# Supplementary material for: Projecting the prevalence of obesity in South Korea through 2040: a microsimulation modelling approach
Source: PubMed Central journal article supplement — BMJ Open. 2020 Dec 30;10(12):e037629. doi: 10.1136/bmjopen-2020-037629 (PMC7780552; doi:10.1136/bmjopen-2020-037629), 2020-12-30
Supplement: bmjopen-2020-037629.draft_revisions.pdf [file bmjopen-2020-037629.draft_revisions.pdf]

# BMJ Open

BMJ Open is committed to open peer review. As part of this commitment we make the peer review history of every article we publish publicly available.

When an article is published we post the peer reviewers' comments and the authors' responses online. We also post the versions of the paper that were used during peer review. These are the versions that the peer review comments apply to.

The versions of the paper that follow are the versions that were submitted during the peer review process. They are not the versions of record or the final published versions. They should not be cited or distributed as the published version of this manuscript.

BMJ Open is an open access journal and the full, final, typeset and author-corrected version of record of the manuscript is available on our site with no access controls, subscription charges or pay-per-view fees (<http://bmjopen.bmj.com>).

If you have any questions on BMJ Open's open peer review process please email [info.bmjopen@bmj.com](mailto:info.bmjopen@bmj.com)

# BMJ Open

## Projecting the prevalence of obesity in South Korea through 2040: a microsimulation modeling approach

|                               |                                                                                                                                                                                                                                                                                                                                                                                                                                       |
|-------------------------------|---------------------------------------------------------------------------------------------------------------------------------------------------------------------------------------------------------------------------------------------------------------------------------------------------------------------------------------------------------------------------------------------------------------------------------------|
| Journal:                      | <i>BMJ Open</i>                                                                                                                                                                                                                                                                                                                                                                                                                       |
| Manuscript ID                 | bmjopen-2020-037629                                                                                                                                                                                                                                                                                                                                                                                                                   |
| Article Type:                 | Original research                                                                                                                                                                                                                                                                                                                                                                                                                     |
| Date Submitted by the Author: | 10-Feb-2020                                                                                                                                                                                                                                                                                                                                                                                                                           |
| Complete List of Authors:     | Yoon, Seok-Jun; Korea University, Department of Preventive Medicine, Korea University College of Medicine<br>Jung, Yoon-Sun; Korea University, Department of Public Health, Graduate School, Korea University<br>Kim, Young-Eun ; Korea University, Department of Preventive Medicine, Korea University College of Medicine<br>Go, Dun-Sol; Korea University, Department of Preventive Medicine, Korea University College of Medicine |
| Keywords:                     | PUBLIC HEALTH, Health policy < HEALTH SERVICES ADMINISTRATION & MANAGEMENT, PREVENTIVE MEDICINE                                                                                                                                                                                                                                                                                                                                       |
|                               |                                                                                                                                                                                                                                                                                                                                                                                                                                       |

SCHOLARONE™  
Manuscripts

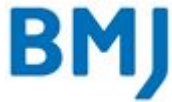

I, the Submitting Author has the right to grant and does grant on behalf of all authors of the Work (as defined in the below author licence), an exclusive licence and/or a non-exclusive licence for contributions from authors who are: i) UK Crown employees; ii) where BMJ has agreed a CC-BY licence shall apply, and/or iii) in accordance with the terms applicable for US Federal Government officers or employees acting as part of their official duties; on a worldwide, perpetual, irrevocable, royalty-free basis to BMJ Publishing Group Ltd ("BMJ") its licensees and where the relevant Journal is co-owned by BMJ to the co-owners of the Journal, to publish the Work in this journal and any other BMJ products and to exploit all rights, as set out in our [licence](#).

The Submitting Author accepts and understands that any supply made under these terms is made by BMJ to the Submitting Author unless you are acting as an employee on behalf of your employer or a postgraduate student of an affiliated institution which is paying any applicable article publishing charge ("APC") for Open Access articles. Where the Submitting Author wishes to make the Work available on an Open Access basis (and intends to pay the relevant APC), the terms of reuse of such Open Access shall be governed by a Creative Commons licence – details of these licences and which [Creative Commons](#) licence will apply to this Work are set out in our licence referred to above.

Other than as permitted in any relevant BMJ Author's Self Archiving Policies, I confirm this Work has not been accepted for publication elsewhere, is not being considered for publication elsewhere and does not duplicate material already published. I confirm all authors consent to publication of this Work and authorise the granting of this licence.

1 **Title: Projecting the prevalence of obesity in South Korea through 2040: a**  
2 **microsimulation modeling approach**

3  
4 **Authors:** Yoon-Sun Jung <sup>a\*</sup>, Young-Eun Kim<sup>b</sup>, Dun-Sol Go<sup>b</sup>, Seok-Jun Yoon<sup>b</sup>

5 **Affiliations:**

6 <sup>a</sup>Department of Public Health, Korea University, Seoul, Korea

7 <sup>b</sup>Department of Preventive Medicine, Korea University College of Medicine, Seoul, Korea

8  
9 **Address for Correspondence:**

10 Seok-Jun Yoon, M.D., Ph.D.

11 Department of Preventive Medicine, Korea University College of Medicine,

12 73 Goryeodae-ro, Seongbuk-gu, Seoul, 02841, Korea

13 E-mail: yoonsj02@korea.ac.kr

14 -

15 **E-mail addresses:**

16 sunnyauro@nate.com (Yoon-Sun Jung)

17 kimyes4454@gmail.com (Young-Eun Kim)

18 kds237@gmail.com (Dun-Sol Go)

19  
20 **Keywords:** Microsimulation, body mass index, obesity, Population Health Model, South  
21 Korea

22  
23 **Word count:** 3,646

24

**ABSTRACT**

**Objective** To project the future prevalence of obesity among populations 19 years and older by 2040 in South Korea

**Design, setting, and participants** Using the 'Population Health Model-Body Mass Index' (BMI) microsimulation model, the prevalence of obesity in Korean adults 19 years and over was projected until the year 2040. The model integrates individual survey data from the Korea Health Panel Survey of 2011 and 2012, population statistics based on resident registration, population projections, and complete life tables categorized by sex and age. Birth rate, life expectancy, and international migration were based on a medium growth scenario. The base population of Korean adults in 2012, devised through data aggregation, was 39,842,730. Prediction equations were formulated using BMI as the dependent variable; the individual's sex, age, smoking status, physical activity, and the preceding year's BMI were used as predictive factors.

**Outcome measure** BMI categorized by sex.

**Results** The average BMI for Korean adults in 2040 was forecast to be 23.47 kg/m<sup>2</sup> (23.91 and 23.04 kg/m<sup>2</sup> for men and women, respectively). According the Korean BMI classification, 70.05% of all adults were forecast to be 'pre-obese' (i.e., have BMIs 23 to 24.9) by 2040 (81.23% of men and 59.07% of women), followed by 25.45% who would be 'underweight or normal'.

**Conclusions** Public health interventions need to be established so that the current average BMI, smoking rate, and physical activity rate among Korean adults can be improved.

1  
2  
3 52 **Strengths and limitations of this study**  
4

- 5 53 • This study is the first in South Korea to analyze individual and national data using  
6  
7 54 microsimulation to predict the prevalence of obesity among adults.  
8  
9  
10 55 • We estimated the proportions of adults who will fall into various BMI categories by the  
11  
12 56 year 2040 assuming that the average BMI, smoking rate, and physical activity rates  
13  
14 57 measured in 2012 retain the same trend.  
15  
16  
17 58 • Our predictive model did not take into account nation-specific factors as applicable to  
18  
19 59 Korea.  
20  
21  
22  
23  
24  
25  
26  
27  
28  
29  
30  
31  
32  
33  
34  
35  
36  
37  
38  
39  
40  
41  
42  
43  
44  
45  
46  
47  
48  
49  
50  
51  
52  
53  
54  
55  
56  
57  
58  
59  
60

## 79 BACKGROUND

80 The prevalence of overweight and obesity has increased markedly over the past 3 decades, and  
81 concerns about health risks associated with obesity have become almost universal.[1] The increasing  
82 rate of obesity is a growing public health concern not only in Western countries but also in South  
83 Korea.[2] From the 1990s through the beginning of the new millennium, the prevalence of adult and  
84 child obesity has increased rapidly and continues to rise steadily in parallel with rapid social and  
85 economic development.[3]

86 Obesity is not only a major public health problem in and of itself, but also a factor in the  
87 development of many chronic diseases; hence, it constitutes a strain on individuals and health systems  
88 worldwide. In the Global Burden of Disease Study,[4] globally in 2017, a high body mass index (BMI)  
89 accounted for 4.72 million deaths and 148.0 million disability-adjusted life-years. It is associated with  
90 an increased risk of many disorders, including diabetes, hypertension, dyslipidemia, heart disease,  
91 stroke, sleep apnea, early death, and cancer.[5-9] Moreover, obesity among older people increases the  
92 risk of knee osteoarthritis[10] and reduces functional capacity and quality of life.[11-14] The  
93 prevalence of these conditions rises commensurate with increased obesity, [15-18] and are associated  
94 with significant morbidity, higher risks of mortality, and increased economic costs for both  
95 individuals and the society at large.[19]

96 A study of data from the National Health Insurance Service in Korea found that the  
97 socioeconomic cost of obesity in 2016 was approximately 9,665.32 million US dollars; medical  
98 expenses accounted for 51.3% of this amount, followed by decreasing productivity (20.5%),  
99 productivity loss (13.1%), early mortality (10.0%), care costs (4.3%), and transportation costs  
100 (0.8%).[20] Several studies on the long-term trends of obesity prevalence in South Korea found that  
101 obesity is increasing in men but not in women.[21-23] Although numerous investigators in other  
102 countries have attempted to predict the prevalence of obesity into the future, only one such study by  
103 Inkyung Baik was recently performed in South Korea.[2] More recent trends still need to be  
104 investigated through predictive studies, and the accurate prediction of obesity prevalence remains an  
105 important public health-related goal in the country.

1  
2  
3 106 To efficiently establish and execute an effective healthcare policy, which would require a large budget,  
4  
5 107 it is necessary to select future targets for policy interventions (such as high-risk groups) to predict  
6  
7 108 future healthcare needs and prevent budget waste.

9 109 Past prediction models incorporated a country's entire population; as such, macroscopic inferences  
11 110 based on average projections for the future society were generalized. However, when establishing a  
13 111 healthcare policy, it is necessary to estimate the future disease burden and medical needs of the entire  
15 112 population based on future projections that reflect individual characteristics, because a real-world  
17 113 understanding of the factors that are influenced by the policies or institutions is required. Individuals  
19 114 are independent entities with different characteristics and needs that govern their future decisions and  
21 115 behaviors. By applying these needs to the healthcare sector, health-related projections can be modeled  
23 116 by reflecting health risk factors such as sex, age, life cycle activities, smoking, etc.; as such, the  
25 117 effects of policy interventions can be quantified.[24] In this study, we aimed to predict the prevalence  
27 118 of obesity in Korea by using microsimulation, which is optimal for considering individual properties.

30 119 Microsimulation is a modeling technique that typically uses individual microunits, each with  
32 120 its own set of properties, to simulate downstream events based on the probability of transition  
34 121 between predefined states and their changes over time. When used in medicine, microsimulation can  
36 122 be particularly powerful because it preserves the patterns of previous behaviors and conditions, and  
38 123 allows for a clearer representation and understanding of how various processes affect the total  
40 124 outcome of the population over time. Collecting individual events from within a population that has  
42 125 varying attributes can be used to predict and plan outcomes (such as incidence, prevalence, and cost),  
44 126 and can also be used to assess the clinical and cost effectiveness of alternative health interventions.[25]  
47 127 Microsimulation modeling is particularly useful for studying BMI trends because it can  
49 128 simultaneously explain population dynamics such as aging, migration, and mortality. Additionally, the  
51 129 longitudinal framework of these models allows for interpreting a person's change in BMI as it is  
53 130 affected by factors such as a person's physical activity and behavior and thus act as a contributing  
55 131 factor to other diseases, [26]

58 132 Obesity prevalence and trend estimates provide important information for research, policy,  
59  
60



1  
2  
3 133 and intervention.[27] As mentioned above, it is necessary to estimate the magnitude of obesity  
4  
5 134 because it has been identified as a risk factor for various chronic diseases. Because health forecasting  
6  
7 135 predicts disease episodes and portends future events, it facilitates healthcare strategies by promoting  
8  
9 136 the setting of goals to reduce obesity, establish health promotion interventions, and optimize resource  
10  
11 137 allocation.[28] Obesity trends may also be used to urge governments to implement preventative  
12  
13 138 approaches to reducing obesity.[29] Based on the above, we performed this study to project the future  
14  
15 139 trends in obesity prevalence in South Korea up to the year 2040.  
16  
17  
18 140

## 141 **METHODS**

### 142 **Model**

143 We used the Population Health Model (POHEM)-BMI to estimate the prevalence of obesity in adults  
144 19 years and over in South Korea from 2012 through 2040. In brief, POHEM is a time-continuous,  
145 population-based, dynamic microsimulation model with individual underlying units of analysis.  
146 Through dynamic simulation, POHEM creates a population and ages it, one person at a time, until  
147 death.[30] The model dynamically simulates an individual's disease state, risk factors, and health  
148 determinants to describe and plan health outcomes.[31] The POHEM models include cardiovascular  
149 disease, various cancers, osteoarthritis, physical activity, and neurological events. The model used in  
150 this study was the POHEM-BMI; the performance of each prediction step is shown in Figure 1.

151 [Insert Figure 1 here]

### 152 **Base population**

153 To create the base population for the POHEM-BMI model, we used the 2011- 2012 Korea Health  
154 Panel survey and the resident registration-based population statistics. This constituted the base  
155 population for POHEM-BMI (n=39,842,730), reflecting the Korean population. Each Korean  
156 respondent 19 years of age and over (n=11,501) in 2012 was replicated using their survey-recorded  
157 weights to generate a simulated cohort of approximately 39,842,730 individuals. Korea Health Panel  
158 survey data are nationally representative panel surveys that incorporate health status, chronic diseases,  
159 health risk behaviors, and socio-demographic characteristics. Among them, we extracted sex, age,

1  
2  
3 160 current smoking status, physical activity, and the previous and current years' BMI values; these  
4  
5 161 variables were required for the predictive equation. We then used a multiple linear regression model  
6  
7 162 to estimate the BMI value using the independent variables age, sex, smoking status, physical activity,  
8  
9 163 and previous BMI value as predictors. The POHEM-BMI model is auto-regressive and includes  
10  
11 164 previous BMI values as a main explanatory variable.[26] For comparison with other international  
12  
13 165 studies using this model, we used the variables as-is without normalizing them to Korean standards.  
14  
15 166 In terms of predictor definitions, a current smoker was an individual who reported smoking 'every  
16  
17 167 day' or 'sometimes'. Practicing physical activity was defined as performing either intense physical  
18  
19 168 activity for at least 10 continuous minutes a day, 20 minutes total per day, 3 days a week during the  
20  
21 169 preceding week, or moderate physical activity for at least 30 minutes a day, 5 days a week during the  
22  
23 170 preceding week.

#### 26 171 **Simulation: Annual updates and risk transition**

28 172 The population makeup was updated by aging each person by 1 year and changing the total  
29  
30 173 population size based on population statistics, population projections, and complete life tables  
31  
32 174 categorized by sex and age from Statistics Korea. For population projections, we assumed a medium  
33  
34 175 growth scenario in terms of birth rate, life expectancy, and international migration. Each person's  
35  
36 176 BMI was updated annually by applying a predictive equation that incorporates his/her own  
37  
38 177 characteristics. The transition probability for each stochastic characteristic was calculated based on a  
39  
40 178 generalized linear model.

43 179 Similar to the original POHEM-BMI, we assumed that the current individual behavioral  
44  
45 180 patterns persisted, and no new factors arose to prevent obesity. We also assumed that the attributes of  
46  
47 181 19-year-old individuals, which were entered annually, remained similar year-to-year.

#### 49 182 **Model validation and calibration**

51 183 We established the model's validity by comparing the projected BMI average obtained from the  
52  
53 184 prediction model to estimates obtained from the Korea Health Panel survey. We set the calibration  
54  
55 185 cutoff point to 5% and adjusted the model by comparing the difference between the mean BMI  
56  
57 186 estimates observed from the Korea Health Panel survey and the values derived from the prediction  
58  
59  
60

187 model categorized by sex and age. We analyzed the BMIs of each group by comparing the 2016 data  
 188 available from the Korea Health Panel with the most recent data. We accepted a difference of less  
 189 than 5% overall as well as in the sex- and age-categorized groups. Finally, we adjusted the  
 190 demographics of the 2040 population so that the predictions were similar within a 5% margin of error.

### 191 **Projection**

192 The model projected the BMI of each person from 2017 to 2040. Based on demographic  
 193 characteristics, the projections were then aggregated by year for each of the predefined subgroups.  
 194 The various trends observed in the Korean population data were used to generate algorithms that were  
 195 applied to future projections.

### 196 **Model outputs**

197 The final results of the BMI distributions were calculated overall and by sex. Individuals with a BMI  
 198  $\geq 25$  kg/m<sup>2</sup> were obese according to the Guidelines for the Management of Obesity in Korean, which  
 199 is not the internationally accepted standard (see Table 1). According to this guideline, BMI is  
 200 categorized into standard groupings for underweight ( $< 18.5$  kg/m<sup>2</sup>), normal weight (18.5–22.9 kg/m<sup>2</sup>),  
 201 pre-obese (23–24.9 kg/m<sup>2</sup>), obese class I (25–29.9 kg/m<sup>2</sup>), obese class II (30–34.9 kg/m<sup>2</sup>), and  
 202 obese class III ( $\geq 35$  kg/m<sup>2</sup>). All analyses in this study were performed using STATA version 13  
 203 (StataCorp LLC, College Station, TX, USA).

204

205 **Table 1** BMI classification of South Korea

| Classification  | Body mass index<br>(kg/m <sup>2</sup> ) |
|-----------------|-----------------------------------------|
| Underweight     | $< 18.5$                                |
| Normal          | 18.5 – 22.9                             |
| Pre-obese       | 23 – 24.9                               |
| Obese class I   | 25 – 29.9                               |
| Obese class II  | 30 – 34.9                               |
| Obese class III | $\geq 35$                               |

206

207

208 **RESULTS**

209

210

211

212

213

214

215

216

217

218

219

220

221

222

223

224

225

226

227

228

We compared the total numbers of the individuals and characteristics in the initial 2012 population to those in the projected 2040 population (see Table 2) There were 39,842,730 adults who were 19 or over in 2012 and 43,818,808 in 2040. The male:female ratio was nearly 1:1 in both 2012 and 2040. The rapid aging of the Korean population was clearly observed when comparing the 2 eras. The average age of adults was expected to increase by 10.9 years from 45.69 years in 2012 to 56.59 years in 2040 (from 44.57 to 55.54 years among men and from 46.77 to 57.63 years among women). In 2012, the proportion of young people (those in the 19–24, 25–29, 30–34, 35–39, 40–44, 45–49, and 50–54 year age groups combined) accounted for approximately 71% of the adult population (with approximately 10% in each aforementioned age group), while the proportion of individuals aged 65 years and older was relatively low at approximately 14% and that of individuals 80 years of age and older at 2.6%. However, the age group structure in South Korea 28 years later (2040) is predicted to be quite different, as the proportion of the elderly population ( $\geq 80$  years) was estimated to be almost 12% of the total adult population, while the proportion of individuals 19–64 years (i.e., the working age population) was only 60.95% of the adult population.

There was no significant difference between the average BMIs in 2012 and 2040; however, according to the BMI classification in South Korea, approximately 50% of the adult population was ‘underweight or normal’ in 2012, whereas only 25.45% of the population was predicted to be the same in 2040. On the other hand, the ‘pre-obese’ group was expected to account for approximately 70% of the total adult population.

**Table 2** Comparison of number of people, by sex and BMI classification, South Korea, 2012 and 2040

|                                      | Men        |         | Women      |        | Total      |         |
|--------------------------------------|------------|---------|------------|--------|------------|---------|
| <i>Population at baseline (2012)</i> |            |         |            |        |            |         |
| Number of people                     | 19,709,628 |         | 20,133,102 |        | 39,842,730 |         |
| Age (mean)                           | 44.57      |         | 46.77      |        | 45.69      |         |
| 19-24                                | 2,094,471  | (10.63) | 1,873,563  | (9.31) | 3,968,034  | (9.96)  |
| 25-29                                | 1,748,148  | (8.87)  | 1,642,257  | (8.16) | 3,390,405  | (8.51)  |
| 30-34                                | 2,047,849  | (10.39) | 1,962,314  | (9.75) | 4,010,163  | (10.06) |

|                                        |            |         |            |         |            |         |
|----------------------------------------|------------|---------|------------|---------|------------|---------|
| 35-39                                  | 2,095,269  | (10.63) | 2,027,690  | (10.07) | 4,122,959  | (10.35) |
| 40-44                                  | 2,316,943  | (11.76) | 2,248,910  | (11.17) | 4,565,853  | (11.46) |
| 45-49                                  | 2,120,987  | (10.76) | 2,026,584  | (10.07) | 4,147,571  | (10.41) |
| 50-54                                  | 2,160,552  | (10.96) | 2,128,759  | (10.57) | 4,289,311  | (10.77) |
| 55-59                                  | 1,616,103  | (8.20)  | 1,631,900  | (8.11)  | 3,248,003  | (8.15)  |
| 60-64                                  | 1,145,904  | (5.81)  | 1,194,718  | (5.93)  | 2,340,622  | (5.87)  |
| 65-69                                  | 879,627    | (4.46)  | 997,490    | (4.95)  | 1,877,117  | (4.71)  |
| 70-74                                  | 737,954    | (3.74)  | 954,289    | (4.74)  | 1,692,243  | (4.25)  |
| 75-79                                  | 445,317    | (2.26)  | 707,930    | (3.52)  | 1,153,247  | (2.89)  |
| 80-                                    | 300,504    | (1.52)  | 736,698    | (3.66)  | 1,037,202  | (2.60)  |
| BMI (mean)                             | 23.60      |         | 22.48      |         | 23.03      |         |
| Number of people by BMI classification |            |         |            |         |            |         |
| Underweight / Normal                   | 8,254,562  | (41.88) | 11,482,066 | (57.03) | 19,736,628 | (49.54) |
| Pre-obese                              | 5,264,866  | (26.71) | 4,207,673  | (20.90) | 9,472,539  | (23.77) |
| Obese class I                          | 5,867,369  | (29.77) | 4,046,607  | (20.10) | 9,913,976  | (24.88) |
| Obese class II                         | 318,297    | (1.61)  | 324,205    | (1.61)  | 642,502    | (1.61)  |
| Obese class III                        | 4,534      | (0.02)  | 72,551     | (0.36)  | 77,085     | (0.19)  |
| Smoking status                         |            |         |            |         |            |         |
| Smoker                                 | 8,879,037  | (45.05) | 450,946    | (2.24)  | 9,329,983  | (23.42) |
| Non-smoker                             | 10,830,591 | (54.95) | 19,682,156 | (97.76) | 30,512,747 | (76.58) |
| Physical activity                      |            |         |            |         |            |         |
| Physical activity                      | 5,199,273  | (26.38) | 3,103,036  | (15.41) | 8,302,309  | (20.84) |
| Physical inactivity                    | 14,510,355 | (73.62) | 17,030,066 | (84.59) | 31,540,421 | (79.16) |
| <b>Projected population (2040)</b>     |            |         |            |         |            |         |
| Number of people                       | 21,717,128 |         | 22,101,680 |         | 43,818,808 |         |
| Age (mean)                             | 55.54      |         | 57.63      |         | 56.59      |         |
| 19-24                                  | 1,249,921  | (5.76)  | 1,189,386  | (5.38)  | 2,439,307  | (5.57)  |
| 25-29                                  | 1,165,520  | (5.37)  | 1,106,562  | (5.01)  | 2,272,082  | (5.19)  |
| 30-34                                  | 1,160,786  | (5.35)  | 1,091,788  | (4.94)  | 2,252,574  | (5.14)  |
| 35-39                                  | 1,297,513  | (5.97)  | 1,201,131  | (5.43)  | 2,498,644  | (5.70)  |
| 40-44                                  | 1,696,199  | (7.81)  | 1,552,548  | (7.02)  | 3,248,747  | (7.41)  |
| 45-49                                  | 1,838,461  | (8.47)  | 1,632,766  | (7.39)  | 3,471,227  | (7.92)  |
| 50-54                                  | 1,599,077  | (7.36)  | 1,475,843  | (6.68)  | 3,074,920  | (7.02)  |
| 55-59                                  | 1,882,322  | (8.67)  | 1,821,485  | (8.24)  | 3,703,807  | (8.45)  |
| 60-64                                  | 1,880,827  | (8.66)  | 1,866,992  | (8.45)  | 3,747,819  | (8.55)  |
| 65-69                                  | 2,078,232  | (9.57)  | 2,101,456  | (9.51)  | 4,179,688  | (9.54)  |
| 70-74                                  | 1,956,454  | (9.01)  | 2,055,954  | (9.30)  | 4,012,408  | (9.16)  |
| 75-79                                  | 1,739,807  | (8.01)  | 1,919,444  | (8.68)  | 3,659,251  | (8.35)  |
| 80-                                    | 2,172,009  | (10.00) | 3,086,325  | (13.96) | 5,258,334  | (12.00) |
| BMI (mean)                             | 23.91      |         | 23.04      |         | 23.47      |         |
| Number of people by BMI classification |            |         |            |         |            |         |
| Underweight / Normal                   | 2,327,521  | (10.72) | 8,823,981  | (39.92) | 11,151,502 | (25.45) |

|     |             |            |         |            |         |            |         |
|-----|-------------|------------|---------|------------|---------|------------|---------|
|     | Pre-obese   | 17,641,668 | (81.23) | 13,055,482 | (59.07) | 30,697,150 | (70.05) |
| I   | Obese class | 1,712,332  | (7.88)  | 221,829    | (1.00)  | 1,934,161  | (4.41)  |
| II  | Obese class | 33,455     | (0.15)  | 388        | (0.00)  | 33,843     | (0.08)  |
| III | Obese class | 2,152      | (0.01)  | 0          | (0.00)  | 2,152      | (0.00)  |

229

230

231

The model was well calibrated in both the initial population and from 2017 to 2040.

232

Differences in each of the variables estimated between 2013 to 2016, which were derived from the

233

Korea Health Panel data, were within the 5% range only when using the predictive model.

234

Additionally, when compared to the population structure for 2040 (the final year) as predicted by

235

Statistics Korea, the total population and gender and age-specific ratio were similar.

236

Figure 2 shows the average predicted BMIs between 2017 and 2040. Each average BMI

237

value from 2013 to 2016 was estimated from the Korea Health Panel survey. The average BMI for the

238

entire adult population is predicted to increase very slightly from 23.19 kg/m<sup>2</sup> in 2017 to 23.46 kg/m<sup>2</sup>

239

in 2036 and is expected to remain steady thereafter. The predicted mean BMI trends are similar for

240

men and women; the mean BMI in adult men was projected to increase only slightly, from 23.72

241

kg/m<sup>2</sup> in 2017 to 23.91 kg/m<sup>2</sup> in 2036 (from 22.67 kg/m<sup>2</sup> in 2017 to 23.01 in 2036 kg/m<sup>2</sup> for adult

242

women) and then almost plateau thereafter.

243

[Insert Figure 2 here]

244

The BMI distributions for men and women from 2012 to 2040 are shown in Figure 3. The

245

proportions of 'pre-obese' individuals in both sexes are predicted to increase dramatically over time,

246

while the proportions of individuals who are classified as 'underweight or normal' and 'obese' will

247

gradually decrease. As of 2025, 52.35% of all male adults were expected to be pre-obese, with that

248

proportion expected to be close to 81.23% by 2040. Moreover, 53.24% of all adult women are

249

expected to be 'pre-obese' by 2035, with the proportion rising to almost 59.078% by 2040.

250

[Insert Figure 3A and 3B here]

251

## 252 DISCUSSION

253 The purpose of this study was to predict the prevalence of obesity in South Korea in the year  
254 2040 using a microsimulation model. In the field of healthcare, microsimulation can predict the  
255 burden of disease by modeling various health risk factors that occur during an individual's lifetime.  
256 Given macro-effects such as changes in population structures in the forecasting model,  
257 microsimulation is very useful in that it can estimate both disease burdens and medical needs across  
258 the country.[24] While microsimulation models have been steadily evolving across health- and  
259 economy-related fields in many European countries,[32] they have yet to be actively utilized in South  
260 Korea (especially for healthcare). In this study, we strove to predict future adult obesity rates in South  
261 Korea using the POHEM-BMI, which is developed by Statistics Canada. POHEM is one of several  
262 population-based health dynamic microsimulation models used worldwide. Dynamic microsimulation,  
263 in the context of social science and population health, is a simulation of individuals (i.e., micro-level)  
264 and their behaviors, statuses, and actions (dynamics) over time.[33] These are modeled as desired  
265 using multiple sources of empirical data, including cross-sectional surveys, administrative databases,  
266 vital statistics, and census data.[31]

267 Summarizing the predicted results, the average BMI of South Korea's adult population aged  
268 19 years and older was expected to be 23.47 in 2040, while the percentage of 'pre-obese' individuals  
269 was expected to increase over time. While it is encouraging that the proportion of 'obese' people (i.e.,  
270 those with BMIs  $\geq 25$  kg/m<sup>2</sup>) in 2040 is predicted to be much lower than that in 2012, it is  
271 discouraging that the proportion of 'underweight or normal' individuals is also markedly lower. Most  
272 notably, the pre-obesity rate is predicted to rise dramatically. In addition to the sex and age of each  
273 individual, our model includes only smoking and physical activity as health-related behaviors. The  
274 distributions of these factors were assumed to remain equal across the years; hence, our data show that  
275 maintaining smoking and physical activity rates at 2012 levels among adults will lead to a sharp  
276 increase in the 'pre-obese' population by 2040.

277 To our knowledge, the only other study that predicted future obesity rates among South  
278 Korean adults was the aforementioned investigation by Baik.[2] That study explored factors affecting

1  
2  
3 279 adult obesity as well as abdominal obesity, and constructed forecasting models to predict obesity  
4  
5 280 prevalence rates in 2020 and 2030 using the Korea National Health and Nutritional Examination  
6  
7 281 Survey (KNHANES). The prevalence rates of obesity among men and women in that study were  
8  
9 282 predicted to be 47% and 32%, respectively, in 2020 and 62% and 37%, respectively, in 2030; these  
10  
11 283 data were inconsistent with our own. The differences appeared to be caused by the different secondary  
12  
13 284 sources used in the 2 studies, as well as the different independent variables and prediction  
14  
15 285 methodologies. In particular, the obesity rate in the initial population according to the KNHANES  
16  
17 286 tended to be higher; as such, a higher initial prevalence rate would lead to a higher projection.[34]  
18  
19 287 Most importantly, Baik's study did not consider the preceding year's BMI, which was a major  
20  
21 288 independent variable in our study; this may be a major explanation for the differences in findings  
22  
23 289 between the 2 studies. We also compared our results to those predicted in Canada using the same  
24  
25 290 model we used; based on self-reported BMIs, approximately 59% of the adult Canadian population  
26  
27 291 was predicted to be 'overweight or obese' (i.e., BMIs >25 kg/m<sup>2</sup>) by 2030, which is a much higher  
28  
29 292 percentage than that predicted in South Korea (10.12%).  
30  
31

32  
33 293 With respect to worldwide comparisons, whether cutoff points for overweight and obesity  
34  
35 294 should be lower for Asians than for another ethnic group remains debated.[35] Because of racial  
36  
37 295 differences, the World Health Organization has proposed regarding BMIs of 18.5–22.9 kg/m<sup>2</sup> as  
38  
39 296 optimal, 23–24.9 kg/m<sup>2</sup> as overweight, 25–29.9 kg/m<sup>2</sup> as moderate obesity, and ≥30 kg/m<sup>2</sup> as severe  
40  
41 297 obesity for Asians.[36] If the international BMI standard were to be applied in our study, the results  
42  
43 298 would be much more favorable given that a large proportion of subjects would be classified as normal.  
44  
45 299 However, more research is needed to determine particular BMI values that increase the likelihood of  
46  
47 300 developing particular chronic disease, depending on the sex and age of the individual. The Korean  
48  
49 301 Society of Obesity, which was established to improve obesity management through research and  
50  
51 302 education, revised its clinical practical guidelines for the prevention and treatment of obesity in 2018.  
52  
53 303 The new guidelines renamed the "overweight" category to "pre-obese", and divided obesity into 3  
54  
55 304 categories, thereby aiming to highlight the risk of obesity instead of promoting the term "overweight."  
56  
57 305 The most recent guidance is based in part on data from of 84,690,131 Korean adults extracted from  
58  
59  
60



1  
2  
3 306 the Korean National Health Insurance Service Health Checkup Database between 2006 and 2015. By  
4  
5 307 including the entire population registered in the National Health Insurance Services Database, they  
6  
7 308 calculated the first and second cutoff points corresponding to the increased risk of any of 3  
8  
9 309 accompanying diseases (type 2 diabetes, hypertension, and dyslipidemia). The first and second BMI  
10  
11 310 cutoff levels were 23 kg/m<sup>2</sup> and 25 kg/m<sup>2</sup>, respectively.[37,38] Rather than emphasizing the BMI  
12  
13 311 classification criteria, however, future studies ought to analyze the BMI reference points that can  
14  
15 312 significantly predict the occurrence of chronic diseases by sex and age group. Based on such evidence,  
16  
17 313 the developing governmental 'National Health Promotion Comprehensive Plan' needs to incorporate  
18  
19 314 additional, wider-ranging goals that take into account the characteristics of each sex and age group,  
20  
21 315 rather than presenting goals for obesity prevalence among adult men and women. Moreover,  
22  
23 316 systematic public health interventions that are tailored to individual characteristics need to be  
24  
25 317 established.

26  
27  
28 318 A limitation of this study was that the forecast model was not specific to Korea, as no  
29  
30 319 microsimulation model for predicting obesity prevalence has been developed in this country.  
31  
32 320 Therefore, we borrowed a model from Statistics Canada and performed an international comparison.  
33  
34 321 For that reason, the variables used as predictors included only sex, age, smoking, physical activity,  
35  
36 322 and the preceding year's BMI value. Nevertheless, our study's importance is that it is the first to  
37  
38 323 examine the possibility of using microsimulation to predict future BMI averages in South Korea.  
39  
40 324 Additionally, it is important to note that the BMI of the future adult population was predicted after  
41  
42 325 considering the change in population structure at the macro level as well as individual health behavior  
43  
44 326 components at the micro level.

45  
46  
47 327

## 48 49 328 **CONCLUSION**

50  
51 329 The key finding of this study is that by 2040, 70.05% of Korean adults are predicted to be  
52  
53 330 pre-obese. Utilizing data sources available in Korea, the possibility of applying and expanding on the  
54  
55 331 concept of microsimulation was explored. In future studies, a model suitable for South Korea needs to  
56  
57 332 be developed, and the effectiveness of specific health policies ought to be assessed by applying  
58  
59  
60

333 various relevant scenarios to the basic forecasting model.

334

### 335 **Abbreviations**

336 BMI: body mass index; KNHANES: Korea National Health and Nutritional Examination  
337 Survey, POHEM: Population Health Model

### 338 **Contributions**

339 YS (the first author) designed the study, analyzed and interpreted the data, and wrote the  
340 paper. YE participated in the statistical analysis. DS provided assistance in the interpretation of the  
341 data and preparation of the manuscript. SJ (the corresponding author) directed this study. All authors  
342 read and approved the final version of the manuscript.

### 343 **Funding**

344 This work was supported by the National Research Foundation of Korea (NRF) grant funded  
345 by the Korea government (Ministry of Science and ICT) (No. 2017R1A2B4005876). The funding  
346 agency had no role in the study design, analysis and interpretation of the data, or the preparation of  
347 the manuscript.

### 348 **Competing Interests**

349 The authors declare that they have no competing interests.

### 350 **Ethics approval**

351 This study used publicly available data of Korea Health Panel Survey 2011-2012 from The  
352 Korea Institute for Health and Social Affairs and the National Health Insurance, population statistics  
353 based on resident registration, population projections, complete life tables and future mortality rates  
354 from Statistics Korea. The dataset does not contain any identifiable personal information. Ethical  
355 approval was given by the Institutional Review Board of Korea University, Seoul, Korea (IRB No.  
356 KUIRB-2020-0018-01).

357 **Provenance and peer review** Not commissioned; externally peer reviewed.

### 358 **Data sharing statement**

359 The Korea Health Panel Survey data used in this article is available in

360 <https://www.khp.re.kr:444/eng/data/data.do>. Detailed information on the survey design and data  
361 characteristics are provided at <https://www.khp.re.kr:444/eng/survey/sampling.do>. Population  
362 statistics, population projections, and complete life tables are available from <http://kosis.kr/eng/>.

363

364 **REFERENCES**

365

- 366 1. Ng M, Fleming T, Robinson M, et al. Global, regional, and national prevalence of overweight and  
367 obesity in children and adults during 1980-2013: a systematic analysis for the Global Burden of  
368 Disease Study 2013. *Lancet* 2014;384:766–81. [https://doi.org/10.1016/S0140-6736\(14\)60460-8](https://doi.org/10.1016/S0140-6736(14)60460-8)
- 369 2. I Baik. Forecasting obesity prevalence in Korean adults for the years 2020 and 2030 by the analysis of  
370 contributing factors. *Nutr Res Pract* 2018;12:25–7. <https://dx.doi.org/10.4162/nrp.2018.12.3.251>
- 371 3. D Kim, C Ahn, SY Nam. Prevalence of obesity in Korea. *Obesity Rev* 2005;6:117–21.  
372 <https://doi.org/10.1111/j.1467-789X.2005.00173.x>
- 373 4. GBD 2017 Risk Factor Collaborators. Global, regional, and national comparative risk assessment of  
374 84 behavioural, environmental and occupational, and metabolic risks or clusters of risks for 195  
375 countries and territories, 1990-2017: a systematic analysis for the Global Burden of Disease Study  
376 2017. *Lancet* 2018;392:1923–94. [https://doi.org/10.1016/S0140-6736\(18\)32225-6](https://doi.org/10.1016/S0140-6736(18)32225-6)
- 377 5. Okosun IS, Chandra KMD, Choi S, et al. Hypertension and type 2 diabetes comorbidity in adults in  
378 the United States: Risk of overall and regional adiposity. *Obes Res* 2001;9:1–9.  
379 <https://doi.org/10.1038/oby.2001.1>
- 380 6. Krauss RM, Winston M, Fletcher BJ, et al. Obesity: impact on cardiovascular disease. *Circulation*  
381 1998;98:1472–6.
- 382 7. Chin K, Ohi M. Obesity and obstructive sleep apnea syndrome. *Intern Med* 1999;38:200–2.  
383 <https://doi.org/10.2169/internalmedicine.38.200>
- 384 8. Wallström P, Bjartell A, Gullberg B, et al. A prospective Swedish study on body size, body  
385 composition, diabetes, and prostate cancer risk. *Brit J Cancer* 2009;100:1799–805.  
386 <https://doi.org/10.1038/sj.bjc.6605077>
- 387 9. Guh DP, Zhang W, Bansback N, et al. The incidence of comorbidities related to obesity and  
388 overweight: a systematic review and meta-analysis. *BMC Public Health* 2009;9:88.  
389 <https://doi.org/10.1186/1471-2458-9-88>

- 1  
2  
3 390 10. Coggon D, Reading I, Croft P, et al. Knee osteoarthritis and obesity. *Int J Obes Relat Metab Disord*  
4 391 2001;25:622–7. <https://doi.org/10.1038/sj.ijo.0801585>  
5  
6  
7 392 11. Stenholm S, Rantanen T, Alanen E, et al. Obesity history as a predictor of walking limitation at old  
8 393 age. *Obesity* 2007;15:929–38. <https://doi.org/10.1038/oby.2007.583>  
9  
10 394 12. Alley DE, Chang VW. The changing relationship of obesity and disability, 1988–2004. *JAMA*  
11 395 2007;298:2020–7. <https://doi.org/10.1001/jama.298.17.2020>  
12  
13 396 13. Larsson U, Karlsson J, Sullivan M. Impact of overweight and obesity on health-related quality of life–  
14 397 a Swedish population study. *Int J Obes Relat Metab Disord* 2002;26:417–24.  
15 398 <https://doi.org/10.1038/sj.ijo.0801919>  
16  
17 399 14. Zaninotto P, Pierce M, Breeze E, et al. BMI and waist circumference as predictors of well-being in  
18 400 older adults: findings from the English Longitudinal Study of Ageing. *Obesity* 2010;18:1981–7.  
19 401 <https://doi.org/10.1038/oby.2009.497>  
20  
21 402 15. Emerging Risk Factors Collaboration, Wormser D, Kaptoge S, et al. Separate and combined  
22 403 associations of body-mass index and abdominal adiposity with cardiovascular disease: Collaborative  
23 404 analysis of 58 prospective studies. *Lancet* 2011;377:1085–95. [https://doi.org/10.1016/S0140-](https://doi.org/10.1016/S0140-6736(11)60105-0)  
24 405 [6736\(11\)60105-0](https://doi.org/10.1016/S0140-6736(11)60105-0)  
25  
26 406 16. The Global Burden of Metabolic Risk Factors for Chronic Diseases Collaboration (BMI Mediated  
27 407 Effects), Lu Y, Hajifathalian K, et al. Metabolic mediators of the effects of body-mass index,  
28 408 overweight, and obesity on coronary heart disease and stroke: A pooled analysis of 97 prospective  
29 409 cohorts with 1.8 million participants. *Lancet* 2014;383:970–83. [https://doi.org/10.1016/S0140-](https://doi.org/10.1016/S0140-6736(13)61836-X)  
30 410 [6736\(13\)61836-X](https://doi.org/10.1016/S0140-6736(13)61836-X)  
31  
32 411 17. Renehan AG, Tyson M, Egger M, et al. Body-mass index and incidence of cancer: A systematic  
33 412 review and meta-analysis of prospective observational studies. *Lancet* 2008;371:569–78.  
34 413 [https://doi.org/10.1016/S0140-6736\(08\)60269-X](https://doi.org/10.1016/S0140-6736(08)60269-X)  
35  
36 414 18. Bhimjiyani A, Knuchel-Takano A, Hunt D, et al. Tipping the scales: Why preventing obesity makes  
37 415 economic sense. Technical Report 2016.  
38 416 [https://www.cancerresearchuk.org/sites/default/files/tipping\\_the\\_scales\\_-\\_cruk\\_full\\_report11.pdf](https://www.cancerresearchuk.org/sites/default/files/tipping_the_scales_-_cruk_full_report11.pdf)  
39 417 (accessed 26 Jan 2020).  
40  
41 418 19. Wang YC, McPherson K, Marsh T, et al. Health and economic burden of the projected obesity trends  
42 419 in the USA and the UK. *Lancet* 2011;378:815–25. [https://doi.org/10.1016/S0140-6736\(11\)60814-3](https://doi.org/10.1016/S0140-6736(11)60814-3)  
43  
44  
45  
46  
47  
48  
49  
50  
51  
52  
53  
54  
55  
56  
57  
58  
59  
60

- 1  
2  
3 420 20. M Lee. Half of the socioeconomic costs of obesity are ‘medical costs’. *Korea Biomedical Review*  
4 (2018, December 10). <http://www.docdocdoc.co.kr/news/articleView.html?idxno=1063317/>  
5 421  
6 (accessed 2020, January 29)  
7 422  
8  
9 423 21. Kang HT, Shim JY, Lee HR, et al. Trends in prevalence of overweight and obesity in Korean adults,  
10 424 1998–2009: the Korean National Health and Nutrition Examination Survey. *J Epidemiol*  
11 425 2014;24:109–16. <https://doi.org/10.2188/jea.je20130017>  
12  
13 426 22. Khang YH, Yun SC. Trends in general and abdominal obesity among Korean adults: findings from  
14 427 1998, 2001, 2005, and 2007 Korea National Health and Nutrition Examination Surveys. *J Korean*  
15 428 *Med Sci* 2010;25:1582–8. <https://doi.org/10.3346/jkms.2010.25.11.1582>  
16  
17 429 23. Yoo S, Cho HJ, Khang YH. General and abdominal obesity in South Korea, 1998–2007: gender and  
18 430 socioeconomic differences. *Prev Med* 2010;51:460–5. <https://doi.org/10.1016/j.ypmed.2010.10.004>  
19  
20 431 24. Kim D. Estimation of disease and disease burden by health behavior. Sejong City: Korea Institute for  
21 432 Health and Social Affairs 2018.  
22  
23 433 25. Çağlayan Ç, Terawaki H, Chen Q, et al. Microsimulation Modeling in Oncology. *JCO Clin Cancer*  
24 434 *Inform* 2018;2:1–11. <https://doi.org/10.1200/CCI.17.00029>  
25  
26 435 26. Hennessy D, Garner R, Flanagan WM, et al. Development of a population-based microsimulation  
27 436 model of body mass index. *Health Rep* 2017;28:20–30.  
28  
29 437 27. The National Academies of Sciences, Engineering, and Medicine. Assessing prevalence and trends in  
30 438 obesity: Navigating the evidence. Washington DC: The National Academies Press 2016.  
31  
32 439 28. Soyiri IN, Reidpath DD. An overview of health forecasting. *Environ Health Prev Med* 2013;18:1–9.  
33 440 <https://doi.org/10.1007/s12199-012-0294-6>  
34  
35 441 29. Pineda E, Sanchez-Romero LM, Brown M, et al. Forecasting future trends in obesity across Europe:  
36 442 The value of improving surveillance. *Obes Facts* 2018;11:360–71. <https://doi.org/10.1159/000492115>  
37  
38 443 30. Manuel DG, Tuna M, Hennessy D, et al. Projections of preventable risks for cardiovascular disease in  
39 444 Canada to 2021: a microsimulation modelling approach. *CMAJ Open* 2014;2:E94–101.  
40 445 <https://doi.org/10.9778/cmajo.2012-0015>  
41  
42 446 31. Hennessy DA, Flanagan WM, Tanuseputro P, et al. The Population Health Model (POHEM): an  
43 447 overview of rationale, methods and applications. *Popul Health Metrics* 2015;13:24.  
44 448 <https://doi.org/10.1186/s12963-015-0057-x>  
45  
46 449 32. Spielauer M. Dynamic microsimulation of health care demand, health care finance and the economic  
47  
48  
49  
50  
51  
52  
53  
54  
55  
56  
57  
58  
59  
60

- 1  
2  
3 450 impact of health behaviours: survey and review. 2007 *International Journal of Microsimulation*  
4  
5 451 2007;1:35–53.  
6  
7 452 33. Zucchelli E, Jones A, Rice N. The evaluation of health policies through dynamic microsimulation  
8  
9 453 methods. *International Journal of Microsimulation* 2012;5:2–20.  
10  
11 454 34. Lin J, Thompson TJ, Cheng YJ, et al. Projection of the future diabetes burden in the United States  
12  
13 455 through 2060. *Popul Health Metr* 2018;16:9. <https://doi.org/10.1186/s12963-018-0166-4>  
14  
15 456 35. Low S, Chin MC, Ma S, et al. Rationale for redefining obesity in Asians. *Ann Acad Med Singapore*  
16  
17 457 2009;38:66–9.  
18  
19 458 36. The World Health Organization Western Pacific Region, International Association for the Study of  
20  
21 459 Obesity. The Asia-Pacific Perspective: Redefining obesity and its treatment. Sydney, Australia: Health  
22  
23 460 Communications Australia Pty Limited; 2000.  
24  
25 461 37. Seo MH, Kim YH, Han K, et al. Prevalence of obesity and incidence of obesity-related comorbidities  
26  
27 462 in Koreans based on National Health Insurance Service Health Checkup Data 2006-2015 (*J Obes*  
28  
29 463 *Metab Syndr* 2018;27:46–52). *J Obes Metab Syndr* 2018;27:198–9.  
30  
31 464 <https://doi.org/10.7570/jomes.2018.27.3.198>  
32  
33 465 38. Seo MH, Lee WY, Kim SS, et al. 2018 Korean Society for the Study of Obesity guideline for the  
34  
35 466 management of obesity in Korea. *J Obes Metab Syndr* 2019;28:40–5.  
36  
37 467 <https://doi.org/10.7570/jomes.2019.28.1.40>  
38  
39 468  
40  
41  
42  
43  
44  
45  
46  
47  
48  
49  
50  
51  
52  
53  
54  
55  
56  
57  
58  
59  
60

**Figure 1** Summary of data sources and methods used to generate and validate projections of distribution of BMI categories in South Korea, 2012-2040

**Figure 2** Population Health Model (POHEM) projections of average BMI in South Korea, 2012-2040

**Figure 3A** Projection of distribution of BMI, Men aged 19 years and older, South Korea, 2012-2040

**Figure 3B** Projection of distribution of BMI, Women aged 19 years and older, South Korea, 2012-2040

**Figure 1** Summary of data sources and methods used to generate and validate projections of distribution of BMI categories in South Korea, 2012-2040

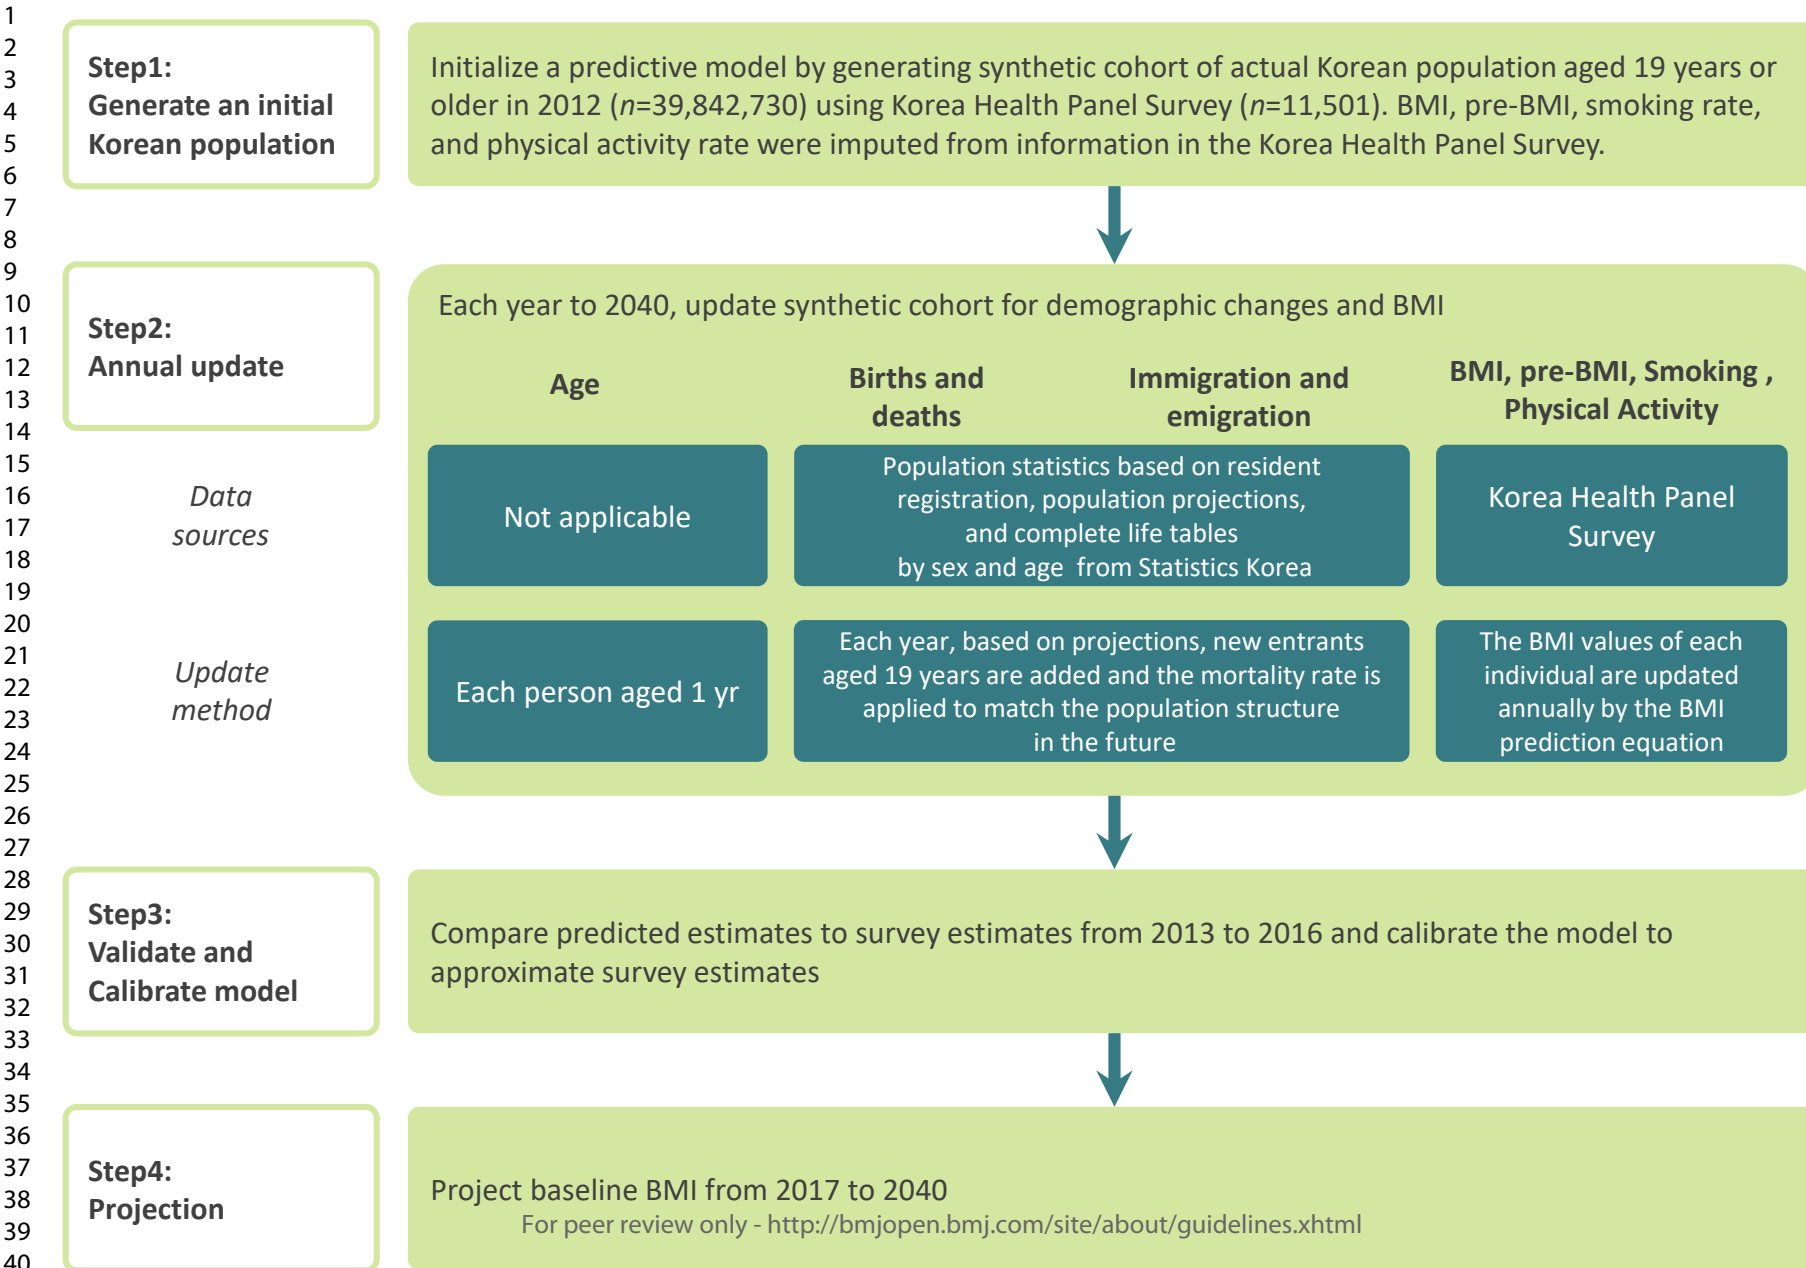

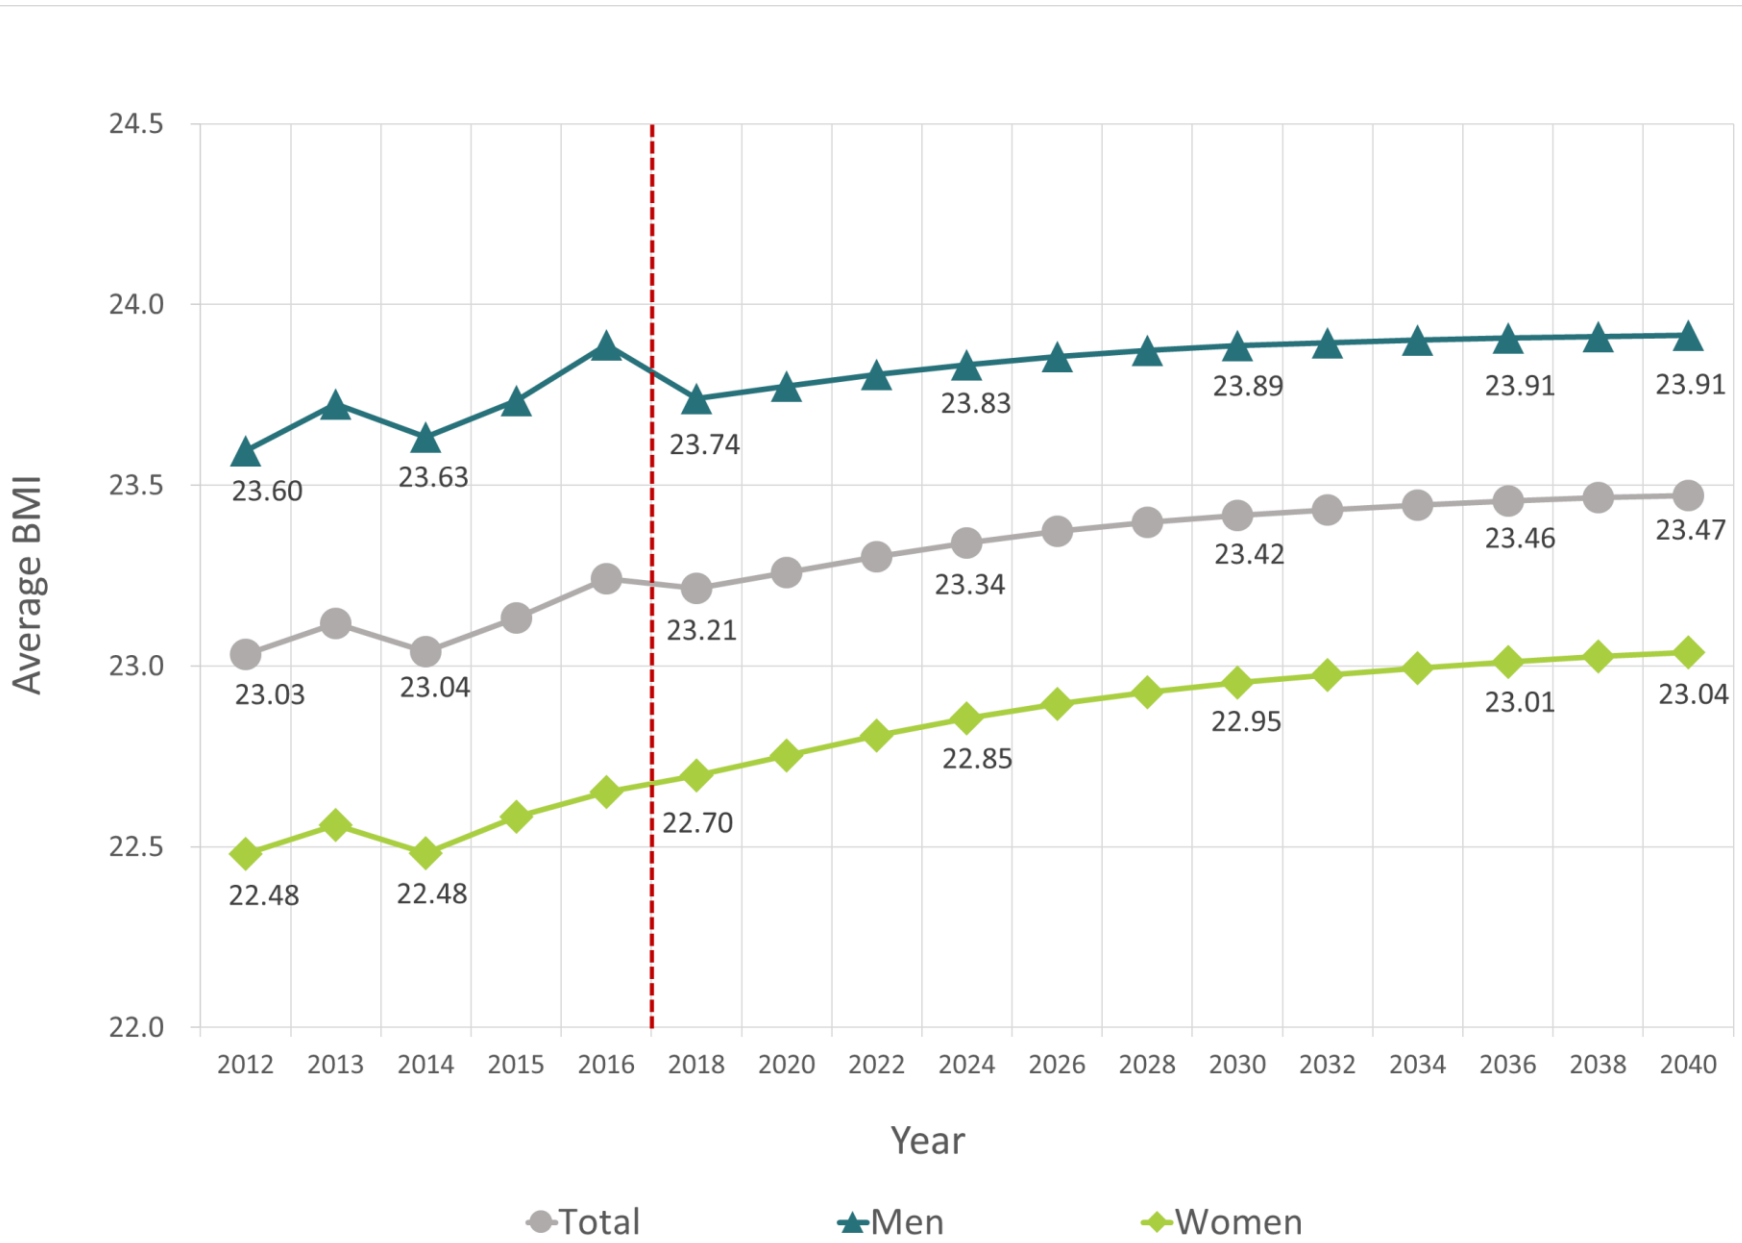

● Total      ▲ Men      ◆ Women



**Figure 3** Projection of distribution of BMI, (A) Men and (B) Women, aged 19 years and older, South Korea, 2012-2040

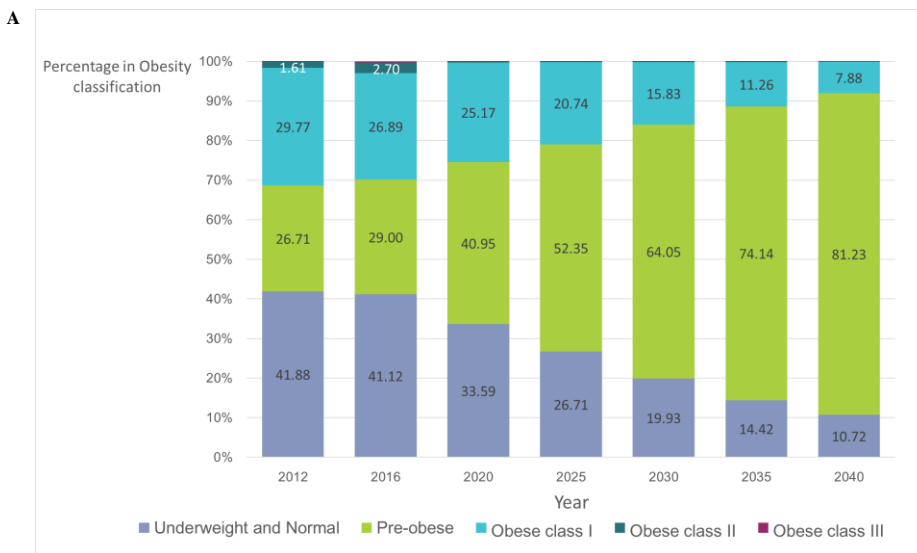

1

**Figure 3** Projection of distribution of BMI, (A) Men and (B) Women, aged 19 years and older, South Korea, 2012-2040

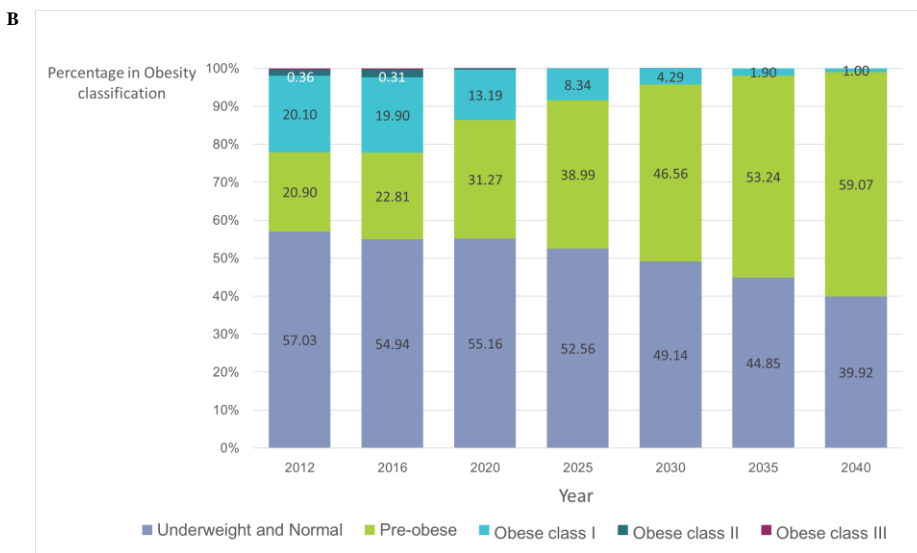

2

## STROBE Statement—checklist of items that should be included in reports of observational studies

|                              | Item No | Recommendation                                                                                                                                                                                                                                                                                                                                                                                                                                                         | Page No |
|------------------------------|---------|------------------------------------------------------------------------------------------------------------------------------------------------------------------------------------------------------------------------------------------------------------------------------------------------------------------------------------------------------------------------------------------------------------------------------------------------------------------------|---------|
| <b>Title and abstract</b>    | 1       | (a) Indicate the study's design with a commonly used term in the title or the abstract                                                                                                                                                                                                                                                                                                                                                                                 | 1-2     |
|                              |         | (b) Provide in the abstract an informative and balanced summary of what was done and what was found                                                                                                                                                                                                                                                                                                                                                                    | 2       |
| <b>Introduction</b>          |         |                                                                                                                                                                                                                                                                                                                                                                                                                                                                        |         |
| Background/rationale         | 2       | Explain the scientific background and rationale for the investigation being reported                                                                                                                                                                                                                                                                                                                                                                                   | 4       |
| Objectives                   | 3       | State specific objectives, including any prespecified hypotheses                                                                                                                                                                                                                                                                                                                                                                                                       | 5       |
| <b>Methods</b>               |         |                                                                                                                                                                                                                                                                                                                                                                                                                                                                        |         |
| Study design                 | 4       | Present key elements of study design early in the paper                                                                                                                                                                                                                                                                                                                                                                                                                | 6       |
| Setting                      | 5       | Describe the setting, locations, and relevant dates, including periods of recruitment, exposure, follow-up, and data collection                                                                                                                                                                                                                                                                                                                                        | 6-8     |
| Participants                 | 6       | (a) <i>Cohort study</i> —Give the eligibility criteria, and the sources and methods of selection of participants. Describe methods of follow-up<br><i>Case-control study</i> —Give the eligibility criteria, and the sources and methods of case ascertainment and control selection. Give the rationale for the choice of cases and controls<br><i>Cross-sectional study</i> —Give the eligibility criteria, and the sources and methods of selection of participants | 6-7     |
|                              |         | (b) <i>Cohort study</i> —For matched studies, give matching criteria and number of exposed and unexposed<br><i>Case-control study</i> —For matched studies, give matching criteria and the number of controls per case                                                                                                                                                                                                                                                 | -       |
| Variables                    | 7       | Clearly define all outcomes, exposures, predictors, potential confounders, and effect modifiers. Give diagnostic criteria, if applicable                                                                                                                                                                                                                                                                                                                               | 6-8     |
| Data sources/<br>measurement | 8*      | For each variable of interest, give sources of data and details of methods of assessment (measurement). Describe comparability of assessment methods if there is more than one group                                                                                                                                                                                                                                                                                   | 6-7     |
| Bias                         | 9       | Describe any efforts to address potential sources of bias                                                                                                                                                                                                                                                                                                                                                                                                              | 7-8     |
| Study size                   | 10      | Explain how the study size was arrived at                                                                                                                                                                                                                                                                                                                                                                                                                              | 6       |
| Quantitative variables       | 11      | Explain how quantitative variables were handled in the analyses. If applicable, describe which groupings were chosen and why                                                                                                                                                                                                                                                                                                                                           | 7       |
| Statistical methods          | 12      | (a) Describe all statistical methods, including those used to control for confounding                                                                                                                                                                                                                                                                                                                                                                                  | 6-8     |
|                              |         | (b) Describe any methods used to examine subgroups and interactions                                                                                                                                                                                                                                                                                                                                                                                                    | 7       |
|                              |         | (c) Explain how missing data were addressed                                                                                                                                                                                                                                                                                                                                                                                                                            | 7-8     |
|                              |         | (d) <i>Cohort study</i> —If applicable, explain how loss to follow-up was addressed<br><i>Case-control study</i> —If applicable, explain how matching of cases and controls was addressed<br><i>Cross-sectional study</i> —If applicable, describe analytical methods taking account of sampling strategy                                                                                                                                                              | 7-8     |
|                              |         | (e) Describe any sensitivity analyses                                                                                                                                                                                                                                                                                                                                                                                                                                  | -       |

Continued on next page

1  
2  
3  
4  
5  
6  
7  
8  
9  
10  
11  
12  
13  
14  
15  
16  
17  
18  
19  
20  
21  
22  
23  
24  
25  
26  
27  
28  
29  
30  
31  
32  
33  
34  
35  
36  
37  
38  
39  
40  
41  
42  
43  
44  
45  
46  
47  
48  
49  
50  
51  
52  
53  
54  
55  
56  
57  
58  
59  
60**Results**

|                  |     |                                                                                                                                                                                                              |      |
|------------------|-----|--------------------------------------------------------------------------------------------------------------------------------------------------------------------------------------------------------------|------|
| Participants     | 13* | (a) Report numbers of individuals at each stage of study—eg numbers potentially eligible, examined for eligibility, confirmed eligible, included in the study, completing follow-up, and analysed            | 9-11 |
|                  |     | (b) Give reasons for non-participation at each stage                                                                                                                                                         | -    |
|                  |     | (c) Consider use of a flow diagram                                                                                                                                                                           | -    |
| Descriptive data | 14* | (a) Give characteristics of study participants (eg demographic, clinical, social) and information on exposures and potential confounders                                                                     | 9-11 |
|                  |     | (b) Indicate number of participants with missing data for each variable of interest                                                                                                                          | 9-11 |
|                  |     | (c) <i>Cohort study</i> —Summarise follow-up time (eg, average and total amount)                                                                                                                             | 9-11 |
| Outcome data     | 15* | <i>Cohort study</i> —Report numbers of outcome events or summary measures over time                                                                                                                          | 11   |
|                  |     | <i>Case-control study</i> —Report numbers in each exposure category, or summary measures of exposure                                                                                                         | -    |
|                  |     | <i>Cross-sectional study</i> —Report numbers of outcome events or summary measures                                                                                                                           | -    |
| Main results     | 16  | (a) Give unadjusted estimates and, if applicable, confounder-adjusted estimates and their precision (eg, 95% confidence interval). Make clear which confounders were adjusted for and why they were included | 9-11 |
|                  |     | (b) Report category boundaries when continuous variables were categorized                                                                                                                                    | 8    |
|                  |     | (c) If relevant, consider translating estimates of relative risk into absolute risk for a meaningful time period                                                                                             | -    |
| Other analyses   | 17  | Report other analyses done—eg analyses of subgroups and interactions, and sensitivity analyses                                                                                                               | -    |

**Discussion**

|                  |    |                                                                                                                                                                            |       |
|------------------|----|----------------------------------------------------------------------------------------------------------------------------------------------------------------------------|-------|
| Key results      | 18 | Summarise key results with reference to study objectives                                                                                                                   | 12    |
| Limitations      | 19 | Discuss limitations of the study, taking into account sources of potential bias or imprecision. Discuss both direction and magnitude of any potential bias                 | 14    |
| Interpretation   | 20 | Give a cautious overall interpretation of results considering objectives, limitations, multiplicity of analyses, results from similar studies, and other relevant evidence | 12-14 |
| Generalisability | 21 | Discuss the generalisability (external validity) of the study results                                                                                                      | 14    |

**Other information**

|         |    |                                                                                                                                                               |    |
|---------|----|---------------------------------------------------------------------------------------------------------------------------------------------------------------|----|
| Funding | 22 | Give the source of funding and the role of the funders for the present study and, if applicable, for the original study on which the present article is based | 15 |
|---------|----|---------------------------------------------------------------------------------------------------------------------------------------------------------------|----|

\*Give information separately for cases and controls in case-control studies and, if applicable, for exposed and unexposed groups in cohort and cross-sectional studies.

**Note:** An Explanation and Elaboration article discusses each checklist item and gives methodological background and published examples of transparent reporting. The STROBE checklist is best used in conjunction with this article (freely available on the Web sites of PLoS Medicine at <http://www.plosmedicine.org/>, Annals of Internal Medicine at <http://www.annals.org/>, and Epidemiology at <http://www.epidem.com/>). Information on the STROBE Initiative is available at [www.strobe-statement.org](http://www.strobe-statement.org).

# BMJ Open

## Projecting the prevalence of obesity in South Korea through 2040: a microsimulation modeling approach

|                                 |                                                                                                                                                                                                                                                                                                                                                                                                         |
|---------------------------------|---------------------------------------------------------------------------------------------------------------------------------------------------------------------------------------------------------------------------------------------------------------------------------------------------------------------------------------------------------------------------------------------------------|
| Journal:                        | <i>BMJ Open</i>                                                                                                                                                                                                                                                                                                                                                                                         |
| Manuscript ID                   | bmjopen-2020-037629.R1                                                                                                                                                                                                                                                                                                                                                                                  |
| Article Type:                   | Original research                                                                                                                                                                                                                                                                                                                                                                                       |
| Date Submitted by the Author:   | 23-Jun-2020                                                                                                                                                                                                                                                                                                                                                                                             |
| Complete List of Authors:       | Jung, Yoon-Sun; Department of Public Health, Graduate School, Korea University, Seoul, Korea<br>Kim, Young-Eun ; Big Data Department, National Health Insurance Service, Wonju, Korea<br>Go, Dun-Sol; Department of Health Care Policy Research, Korea Institute for Health and Social Affairs<br>Yoon, Seok-Jun; Department of Preventive Medicine, Korea University College of Medicine, Seoul, Korea |
| <b>Primary Subject Heading</b>: | Public health                                                                                                                                                                                                                                                                                                                                                                                           |
| Secondary Subject Heading:      | Health policy                                                                                                                                                                                                                                                                                                                                                                                           |
| Keywords:                       | PUBLIC HEALTH, Health policy < HEALTH SERVICES ADMINISTRATION & MANAGEMENT, PREVENTIVE MEDICINE                                                                                                                                                                                                                                                                                                         |
|                                 |                                                                                                                                                                                                                                                                                                                                                                                                         |

SCHOLARONE™  
Manuscripts



I, the Submitting Author has the right to grant and does grant on behalf of all authors of the Work (as defined in the below author licence), an exclusive licence and/or a non-exclusive licence for contributions from authors who are: i) UK Crown employees; ii) where BMJ has agreed a CC-BY licence shall apply, and/or iii) in accordance with the terms applicable for US Federal Government officers or employees acting as part of their official duties; on a worldwide, perpetual, irrevocable, royalty-free basis to BMJ Publishing Group Ltd ("BMJ") its licensees and where the relevant Journal is co-owned by BMJ to the co-owners of the Journal, to publish the Work in this journal and any other BMJ products and to exploit all rights, as set out in our [licence](#).

The Submitting Author accepts and understands that any supply made under these terms is made by BMJ to the Submitting Author unless you are acting as an employee on behalf of your employer or a postgraduate student of an affiliated institution which is paying any applicable article publishing charge ("APC") for Open Access articles. Where the Submitting Author wishes to make the Work available on an Open Access basis (and intends to pay the relevant APC), the terms of reuse of such Open Access shall be governed by a Creative Commons licence – details of these licences and which [Creative Commons](#) licence will apply to this Work are set out in our licence referred to above.

Other than as permitted in any relevant BMJ Author's Self Archiving Policies, I confirm this Work has not been accepted for publication elsewhere, is not being considered for publication elsewhere and does not duplicate material already published. I confirm all authors consent to publication of this Work and authorise the granting of this licence.

1 **Title: Projecting the prevalence of obesity in South Korea through 2040: a**  
2 **microsimulation modeling approach**

3  
4 **Authors:** Yoon-Sun Jung <sup>a\*</sup>, Young-Eun Kim<sup>b</sup>, Dun-Sol Go<sup>c</sup>, Seok-Jun Yoon<sup>d</sup>

5 **Affiliations:**

6 <sup>a</sup>Department of Public Health, Graduate School, Korea University, Seoul, Korea

7 <sup>b</sup>Big Data Department, National Health Insurance Service, Wonju, Korea

8 <sup>c</sup>Department of Health Care Policy Research, Korea Institute for Health and Social Affairs

9 <sup>d</sup>Department of Preventive Medicine, Korea University College of Medicine, Seoul, Korea

10

11 **Corresponding author:**

12 Seok-Jun Yoon, M.D., Ph.D.

13 Department of Preventive Medicine, Korea University College of Medicine,

14 73, Goryeodae-ro, Seongbuk-gu, Seoul, 02841, Korea

15 E-mail: yoonsj02@korea.ac.kr

16 -

17 **E-mail addresses:**

18 sunnyauroa@nate.com (Yoon-Sun Jung)

19 kimyes4454@gmail.com (Young-Eun Kim)

20 kds237@gmail.com (Dun-Sol Go)

21

22 **Keywords:** Microsimulation, body mass index, obesity, Population Health Model, South  
23 Korea

24

25 **Word count:** 4,337

**ABSTRACT**

**Objective** To project the future prevalence of obesity among populations 19 years and older by 2040 in South Korea

**Design, setting, and participants** Using the ‘Population Health Model-Body Mass Index’ (BMI) microsimulation model, the prevalence of obesity in Korean adults 19 years and over was projected until the year 2040. The model integrates individual survey data from the Korea Health Panel Survey of 2011 and 2012, population statistics based on resident registration, population projections, and complete life tables categorized by sex and age. Birth rate, life expectancy, and international migration were based on a medium growth scenario. The base population of Korean adults in 2012, devised through data aggregation, was 39,842,730. Prediction equations were formulated using BMI as the dependent variable; the individual’s sex, age, smoking status, physical activity, and the preceding year’s BMI were used as predictive factors.

**Outcome measure** BMI categorized by sex.

**Results** The median BMI for Korean adults in 2040 was forecast to be 23.55 kg/m<sup>2</sup> (23.97 and 23.17 kg/m<sup>2</sup> for men and women, respectively). According to the Korean BMI classification, 70.05% of all adults were forecast to be ‘pre-obese’ (i.e., have BMIs 23 to 24.9) by 2040 (81.23% of men and 59.07% of women), followed by 24.88% who would be ‘normal’.

**Conclusions** We explored the possibility of applying and expanding on the concept of microsimulation in the field of healthcare by combining data sources available in Korea using the POHEM model. In future studies, it is necessary to develop a microsimulation model suitable for Korea’s domestic situation, and it is necessary to evaluate the effectiveness of special health policies by applying various prediction scenarios to the basic model.

### Strengths and limitations of this study

- To the best of our knowledge, this study is the first to use a microsimulation model to predict future obesity prevalence in Korea considering the change in population structure (macro level) as well as individual health behavior components (micro level).
- This study has the greatest significance in exploring the possibility of applying and expanding the concept of microsimulation in the field of healthcare by combining data sources available in Korea.
- Although a representative data source was used in this study, the prevalence of obesity may be underestimated because it is based on a self-reported BMI value.
- The estimated BMI value differs from the Korea Health Statistics, which is based on the data measured by actual measurement.
- There is a limitation that it does not accurately reflect the domestic situation because it borrows a micro-simulation model developed abroad.



## 80 BACKGROUND

81 The prevalence of overweight and obesity has increased markedly over the past 3 decades, and  
82 concerns about health risks associated with obesity have become almost universal.[1] The increasing  
83 rate of obesity is a growing public health concern not only in Western countries but also in South  
84 Korea.[2] From the 1990s through the beginning of the new millennium, the prevalence of adult and  
85 child obesity has increased rapidly and continues to rise steadily in parallel with rapid social and  
86 economic development.[3]

87 Obesity is not only a major public health problem in and of itself, but also a factor in the  
88 development of many chronic diseases; hence, it constitutes a strain on individuals and health systems  
89 worldwide. In the Global Burden of Disease Study,[4] globally in 2017, a high body mass index  
90 (BMI) accounted for 4.72 million deaths and 148.0 million disability-adjusted life-years. It is  
91 associated with an increased risk of many disorders, including diabetes, hypertension, dyslipidemia,  
92 heart disease, stroke, sleep apnea, early death, and cancer.[5-9] Moreover, obesity among older people  
93 increases the risk of knee osteoarthritis[10] and reduces functional capacity and quality of life.[11-14]  
94 The prevalence of these conditions rises commensurate with increased obesity, [15-18] and are  
95 associated with significant morbidity, higher risks of mortality, and increased economic costs for both  
96 individuals and the society at large.[19]

97 Meanwhile, with respect to worldwide comparisons, whether cutoff points for overweight  
98 and obesity should be lower for Asians than for another ethnic group remains debated.[20] Because of  
99 racial differences, the World Health Organization has proposed regarding BMIs of 18.5–22.9 kg/m<sup>2</sup> as  
100 optimal, 23–24.9 kg/m<sup>2</sup> as overweight, 25–29.9 kg/m<sup>2</sup> as moderate obesity, and ≥30 kg/m<sup>2</sup> as severe  
101 obesity for Asians.[21] However, it is more important to determine particular BMI values that  
102 increase the likelihood of developing particular chronic disease, depending on the sex and age of the  
103 individual. The Korean Society of Obesity, which was established to improve obesity management  
104 through research and education, revised its clinical practical guidelines for the prevention and  
105 treatment of obesity in 2018. The new guidelines renamed the “overweight” category to “pre-obese”,  
106 and divided obesity into 3 categories, thereby aiming to highlight the risk of obesity instead of  
107 promoting the term “overweight.” The most recent guidance is based in part on data from of

1  
2  
3 108 84,690,131 Korean adults extracted from the Korean National Health Insurance Service Health  
4  
5 109 Checkup Database between 2006 and 2015. By including the entire population registered in the  
6  
7 110 National Health Insurance Service Database, they calculated the first and second cutoff points  
8  
9 111 corresponding to the increased risk of any of 3 accompanying diseases (type 2 diabetes, hypertension,  
10  
11 112 and dyslipidemia). The first and second BMI cutoff levels were reported to be 23 kg/m<sup>2</sup> and 25 kg/m<sup>2</sup>,  
12  
13 113 respectively, [22,23] suggesting that obesity criteria reflecting the actual risk of chronic disease in  
14  
15 114 Koreans is necessary.

16  
17  
18 115 A study of data from the National Health Insurance Service in Korea found that the  
19  
20 116 socioeconomic cost of obesity in 2016 was approximately 9,665.32 million US dollars; medical  
21  
22 117 expenses accounted for 51.3% of this amount, followed by decreasing productivity (20.5%),  
23  
24 118 productivity loss (13.1%), early mortality (10.0%), care costs (4.3%), and transportation costs  
25  
26 119 (0.8%).[24] Several studies on the long-term trends of obesity prevalence in South Korea found that  
27  
28 120 obesity is increasing in men but not in women.[25-27] Although numerous investigators in other  
29  
30 121 countries have attempted to predict the prevalence of obesity into the future, only one such study by  
31  
32 122 Inkyung Baik was recently performed in South Korea.[2] More recent trends still need to be  
33  
34 123 investigated through predictive studies, and the accurate prediction of obesity prevalence remains an  
35  
36 124 important public health-related goal in the country. To efficiently establish and execute an effective  
37  
38 125 healthcare policy, which would require a large budget, it is necessary to select future targets for policy  
39  
40 126 interventions (such as high-risk groups) to predict future healthcare needs and prevent budget waste.

41  
42  
43 127 Past prediction models incorporated a country's entire population; as such, macroscopic  
44  
45 128 inferences based on average projections for the future society were generalized. However, when  
46  
47 129 establishing a healthcare policy, it is necessary to estimate the future disease burden and medical  
48  
49 130 needs of the entire population based on future projections that reflect individual characteristics,  
50  
51 131 because a real-world understanding of the factors that are influenced by the policies or institutions is  
52  
53 132 required. Individuals are independent entities with different characteristics and needs that govern their  
54  
55 133 future decisions and behaviors. By applying these needs to the healthcare sector, health-related  
56  
57 134 projections can be modeled by reflecting health risk factors such as sex, age, life cycle activities,  
58  
59 135 smoking, etc.; as such, the effects of policy interventions can be quantified.[28] In this study, we

1  
2  
3 136 aimed to predict the prevalence of obesity in Korea by using microsimulation, which is optimal for  
4  
5 137 considering individual properties.

6  
7 138           Microsimulation is a modeling technique that typically uses individual microunits, each with  
8  
9 139 its own set of properties, to simulate downstream events based on the probability of transition  
10  
11 140 between predefined states and their changes over time. When used in medicine, microsimulation can  
12  
13 141 be particularly powerful because it preserves the patterns of previous behaviors and conditions, and  
14  
15 142 allows for a clearer representation and understanding of how various processes affect the total  
16  
17 143 outcome of the population over time. In other words, microsimulation can predict the burden of  
18  
19 144 disease by modeling various health risk factors that occur during an individual's lifetime. Given  
20  
21 145 macro-effects such as changes in population structures in the forecasting model, microsimulation is  
22  
23 146 very useful in that it can estimate both disease burdens and medical needs across the country.[28]  
24  
25 147 Collecting individual events from within a population that has varying attributes can be used to  
26  
27 148 predict and plan outcomes (such as incidence, prevalence, and cost), and can also be used to assess the  
28  
29 149 clinical and cost effectiveness of alternative health interventions.[29] Microsimulation modeling is  
30  
31 150 particularly useful for studying BMI trends because it can simultaneously explain population  
32  
33 151 dynamics such as aging, migration, and mortality. Additionally, the longitudinal framework of these  
34  
35 152 models allows for interpreting a person's change in BMI as it is affected by factors such as a person's  
36  
37 153 physical activity and behavior and thus act as a contributing factor to other diseases. [30] However,  
38  
39 154 while microsimulation models have been steadily evolving across health- and economy-related fields  
40  
41 155 in many European countries,[31] they have yet to be actively utilized in South Korea (especially for  
42  
43 156 healthcare).

44  
45  
46  
47 157           Obesity prevalence and trend estimates provide important information for research, policy,  
48  
49 158 and intervention.[32] As mentioned above, it is necessary to estimate the magnitude of obesity  
50  
51 159 because it has been identified as a risk factor for various chronic diseases. Because health forecasting  
52  
53 160 predicts disease episodes and portends future events, it facilitates healthcare strategies by promoting  
54  
55 161 the setting of goals to reduce obesity, establish health promotion interventions, and optimize resource  
56  
57 162 allocation.[33] Obesity trends may also be used to urge governments to implement preventative  
58  
59 163 approaches to reducing obesity.[34] Based on the above, we performed this study to project the future

164 trends in obesity prevalence in South Korea up to the year 2040.

165

## 166 **METHODS**

### 167 **Model**

168 We used the Population Health Model (POHEM)-BMI to estimate the prevalence of obesity  
169 in adults 19 years and over in South Korea from 2012 through 2040. In brief, POHEM is a time-  
170 continuous, population-based, dynamic microsimulation model with individual underlying units of  
171 analysis used worldwide. Dynamic microsimulation, in the context of social science and population  
172 health, is a simulation of individuals (i.e., micro-level) and their behaviors, statuses, and actions  
173 (dynamics) over time.[35] These are modeled as desired using multiple sources of empirical data,  
174 including cross-sectional surveys, administrative databases, vital statistics, and census data.[36]  
175 Through dynamic simulation, POHEM creates a population and ages it, one person at a time, until  
176 death.[37] The model dynamically simulates an individual's disease state, risk factors, and health  
177 determinants to describe and plan health outcomes.[36] POHEM is accessible because it wants the  
178 general process to be constant across the country's population, with the exception of variables unique  
179 to each country, such as marriage and mortality. The POHEM models include cardiovascular disease,  
180 various cancers, osteoarthritis, physical activity, and neurological events. The model used in this study  
181 was the POHEM-BMI; the performance of each prediction step is shown in Figure 1.

182 [Insert Figure 1 here]

### 183 **Base population**

184 To create the base population for the POHEM-BMI model, we used the 2011- 2012 Korea Health  
185 Panel survey and the resident registration-based population statistics. This constituted the base  
186 population for POHEM-BMI (n=39,842,730), reflecting the Korean population. Each Korean  
187 respondent 19 years of age and over (n=11,501) in 2012 was replicated using their survey-recorded  
188 weights to generate a simulated cohort of approximately 39,842,730 individuals. Korea Health Panel  
189 survey data are nationally representative panel surveys that incorporate health status, chronic diseases,  
190 health risk behaviors, and socio-demographic characteristics. Among them, we extracted sex, age,  
191 current smoking status, physical activity, and the previous and current years' BMI values; these

192 variables were required for the predictive equation. We then used a multiple linear regression model  
193 to estimate the BMI value using the independent variables age, sex, smoking status, physical activity,  
194 and previous BMI value as predictors. The POHEM-BMI model is auto-regressive and includes  
195 previous BMI values as a main explanatory variable.[30] For comparison with other international  
196 studies using this model, the variable composition was the same, but the variable definition was not.  
197 The definition of variables was consistent with the definition of indicators in the Korea Health  
198 Statistics. In terms of predictor definitions, a current smoker was an individual who reported smoking  
199 'every day' or 'sometimes'. Practicing physical activity was defined as performing either intense  
200 physical activity for at least 10 continuous minutes a day, 20 minutes total per day, 3 days a week  
201 during the preceding week, or moderate physical activity for at least 30 minutes a day, 5 days a week  
202 during the preceding week.

### 203 **Simulation: Annual updates and risk transition**

204 The population makeup was updated by aging each person by 1 year and changing the total  
205 population size based on population statistics, population projections, and complete life tables  
206 categorized by sex and age from Statistics Korea. For population projections, we assumed a medium  
207 growth scenario in terms of birth rate, life expectancy, and international migration. Each person's  
208 BMI was updated annually by applying a predictive equation that incorporates his/her own  
209 characteristics. The transition probability for each stochastic characteristic was calculated based on a  
210 generalized linear model.

211 Similar to the original POHEM-BMI, we assumed that the current individual behavioral  
212 patterns persisted, and no new factors arose to prevent obesity. We also assumed that the attributes of  
213 19-year-old individuals, which were entered annually, remained similar year-to-year.

### 214 **Model validation and calibration**

215 We established the model's validity by comparing the projected BMI median obtained from  
216 the prediction model to estimates obtained from the Korea Health Panel survey. We set the calibration  
217 cutoff point to 5% and adjusted the model by comparing the difference between the median BMI  
218 estimates observed from the Korea Health Panel survey and the values derived from the prediction  
219 model categorized by sex and age. We analyzed the BMIs of each group by comparing the 2016 data

220 available from the Korea Health Panel with the most recent data. We accepted a difference of less  
 221 than 5% overall as well as in the sex- and age-categorized groups. Finally, we adjusted the  
 222 demographics of the 2040 population so that the predictions were similar within a 5% margin of error.  
 223 In this study, all necessary data for model building and projection were obtained from publicly  
 224 available data and does not include any identifiable personal information, so no additional ethical  
 225 approval was required. In addition, ethical and governance approvals were granted by the Korea  
 226 Institute for Health and Social Affairs which conducts Korea Health Panel Survey. All participants  
 227 gave written informed consent to take part before they were allowed to complete the survey.

228

### 229 **Projection**

230 The model projected the BMI of each person from 2017 to 2040. Based on demographic  
 231 characteristics, the projections were then aggregated by year for each of the predefined subgroups.  
 232 The various trends observed in the Korean population data were used to generate algorithms that were  
 233 applied to future projections.

### 234 **Model outputs**

235 The final results of the BMI distributions were calculated overall and by sex. Individuals with a BMI  
 236  $\geq 25$  kg/m<sup>2</sup> were obese according to the Guidelines for the Management of Obesity in Korean, which  
 237 is not the internationally accepted standard (see Table 1). According to this guideline, BMI is  
 238 categorized into standard groupings for underweight (<18.5 kg/m<sup>2</sup>), normal weight (18.5–22.9 kg/m<sup>2</sup>),  
 239 pre-obese (23–24.9 kg/m<sup>2</sup>), obese class I (25–29.9 kg/m<sup>2</sup>), obese class II (30–34.9 kg/m<sup>2</sup>), and  
 240 obese class III ( $\geq 35$  kg/m<sup>2</sup>). All analyses in this study were performed using STATA version 13  
 241 (StataCorp LLC, College Station, TX, USA).

242

243 **Table 1** BMI classification of South Korea

| Classification | Body mass index<br>(kg/m <sup>2</sup> ) |
|----------------|-----------------------------------------|
| Underweight    | < 18.5                                  |

|                 |             |
|-----------------|-------------|
| Normal          | 18.5 – 22.9 |
| Pre-obese       | 23 – 24.9   |
| Obese class I   | 25 – 29.9   |
| Obese class II  | 30 – 34.9   |
| Obese class III | ≥ 35        |

244

### 245 Patient and public involvement

246 No patient involved

247

### 248 RESULTS

249 We compared the total numbers of the individuals and characteristics in the initial 2012  
 250 population to those in the projected 2040 population (see Table 2) There were 39,842,730 adults who  
 251 were 19 or over in 2012 and 43,818,808 in 2040. The male:female ratio was nearly 1:1 in both 2012  
 252 and 2040. The rapid aging of the Korean population was clearly observed when comparing the 2 eras.  
 253 The average age of adults was expected to increase by 10.9 years from 45.69 years in 2012 to 56.59  
 254 years in 2040 (from 44.57 to 55.54 years among men and from 46.77 to 57.63 years among women).  
 255 In 2012, the proportion of young people (those in the 19–39 and 40–64 year age groups combined)  
 256 accounted for approximately 85.54% of the adult population, while the proportion of individuals aged  
 257 65 years and older was relatively low at approximately 14%. However, the age group structure in  
 258 South Korea 28 years later (2040) is predicted to be quite different, as the proportion of individuals  
 259 19–64 years (i.e., the working age population) was only 60.95% of the adult population, while the  
 260 proportion of the elderly population (≥65 years) was estimated to be almost 40% of the total adult  
 261 population.

262

263 **Table 2** Comparison of number of people, South Korea, 2012 and 2040

|                     | <i>Population at baseline (2012)</i> |              |             |              |             |              | <i>Projected population (2040)</i> |              |             |              |             |              |
|---------------------|--------------------------------------|--------------|-------------|--------------|-------------|--------------|------------------------------------|--------------|-------------|--------------|-------------|--------------|
|                     | Men                                  |              | Women       |              | Total       |              | Men                                |              | Women       |              | Total       |              |
|                     | Number                               | (Percentage) | Number      | (Percentage) | Number      | (Percentage) | Number                             | (Percentage) | Number      | (Percentage) | Number      | (Percentage) |
| Number of people    | 19,709,628                           |              | 20,133,102  |              | 39,842,730  |              | 21,717,128                         |              | 22,101,680  |              | 43,818,808  |              |
| Age (mean±s.d.)     | 44.57±15.60                          |              | 46.77±16.92 |              | 45.69±16.31 |              | 55.54±18.60                        |              | 57.63±19.33 |              | 56.59±19.00 |              |
| 19-39               | 7,985,737                            | (40.52)      | 7,505,824   | (37.29)      | 15,491,561  | (38.88)      | 4,873,740                          | (22.45)      | 4,588,867   | (20.76)      | 9,462,607   | (21.60)      |
| 40-64               | 9,360,489                            | (47.49)      | 9,230,871   | (45.85)      | 18,591,360  | (46.66)      | 8,896,886                          | (40.97)      | 8,349,634   | (37.78)      | 17,246,520  | (39.35)      |
| 65-                 | 2,363,402                            | (11.98)      | 3,396,407   | (16.87)      | 5,759,809   | (14.45)      | 7,946,502                          | (36.59)      | 9,163,179   | (41.45)      | 17,109,681  | (39.05)      |
| Smoking status      |                                      |              |             |              |             |              |                                    |              |             |              |             |              |
| Smoker              | 8,879,037                            | (45.05)      | 450,946     | (2.24)       | 9,329,983   | (23.42)      |                                    |              |             |              |             |              |
| Non-smoker          | 10,830,591                           | (54.95)      | 19,682,156  | (97.76)      | 30,512,747  | (76.58)      |                                    |              |             |              |             |              |
| Physical activity   |                                      |              |             |              |             |              |                                    |              |             |              |             |              |
| Physical activity   | 5,199,273                            | (26.38)      | 3,103,036   | (15.41)      | 8,302,309   | (20.84)      |                                    |              |             |              |             |              |
| Physical inactivity | 14,510,355                           | (73.62)      | 17,030,066  | (84.59)      | 31,540,421  | (79.16)      |                                    |              |             |              |             |              |

264 There was no significant difference between the median BMIs in 2012 and 2040; however, according to the BMI classification in South Korea, approximately

265 41.48% of the adult population was 'normal' in 2012, whereas only 24.88% of the population was predicted to be the same in 2040. (see Table 3) On the



266 other hand, the 'pre-obese' group was expected to account for approximately 70% of the total adult population.

267 **Table 3** Comparison of number of people, by BMI classification, South Korea, 2012 and 2040

|                                        | <i>Population at baseline (2012)</i> |                      |               |                      |               |                     | <i>Projected population (2040)</i> |                      |               |                     |               |                     |
|----------------------------------------|--------------------------------------|----------------------|---------------|----------------------|---------------|---------------------|------------------------------------|----------------------|---------------|---------------------|---------------|---------------------|
|                                        | <b>Men</b>                           |                      | <b>Women</b>  |                      | <b>Total</b>  |                     | <b>Men</b>                         |                      | <b>Women</b>  |                     | <b>Total</b>  |                     |
|                                        | <b>Number</b>                        | <b>(Percent age)</b> | <b>Number</b> | <b>(Percent age)</b> | <b>Number</b> | <b>(Percentage)</b> | <b>Number</b>                      | <b>(Percent age)</b> | <b>Number</b> | <b>(Percentage)</b> | <b>Number</b> | <b>(Percentage)</b> |
| BMI (median)                           | 23.59                                |                      | 22.41         |                      | 23.04         |                     | 23.97                              |                      | 23.17         |                     | 23.55         |                     |
| Number of people by BMI classification |                                      |                      |               |                      |               |                     |                                    |                      |               |                     |               |                     |
| Underweight                            | 840,251                              | (4.26)               | 2,368,051     | (11.76)              | 3,208,302     | (8.05)              | 98,954                             | (0.46)               | 152,500       | (0.69)              | 251,454       | (0.57)              |
| Normal                                 | 7,414,311                            | (37.62)              | 9,114,015     | (45.27)              | 16,528,326    | (41.48)             | 2,228,567                          | (10.26)              | 8,671,481     | (39.23)             | 10,900,048    | (24.88)             |
| Pre-obese                              | 5,264,866                            | (26.71)              | 4,207,673     | (20.90)              | 9,472,539     | (23.77)             | 17,641,668                         | (81.23)              | 13,055,482    | (59.07)             | 30,697,150    | (70.05)             |
| Obese class I                          | 5,867,369                            | (29.77)              | 4,046,607     | (20.10)              | 9,913,976     | (24.88)             | 1,712,332                          | (7.88)               | 221,829       | (1.00)              | 1,934,161     | (4.41)              |
| Obese class II                         | 318,297                              | (1.61)               | 324,205       | (1.61)               | 642,502       | (1.61)              | 33,455                             | (0.15)               | 388           | (0.00)              | 33,843        | (0.08)              |
| Obese class III                        | 4,534                                | (0.02)               | 72,551        | (0.36)               | 77,085        | (0.19)              | 2,152                              | (0.01)               | 0             | (0.00)              | 2,152         | (0.00)              |

268

269

1  
2  
3 270 The model was well calibrated in both the initial population and from 2017 to 2040.  
4  
5 271 Differences in each of the variables estimated between 2013 to 2016, which were derived from the  
6  
7 272 Korea Health Panel data, were within the 5% range only when using the predictive model.  
8  
9 273 Additionally, when compared to the population structure for 2040 (the final year) as predicted by  
10  
11 274 Statistics Korea, the total population and gender and age-specific ratio were similar.

12  
13 275 Figure 2 shows the median predicted BMIs between 2017 and 2040. Each median BMI value  
14  
15 276 from 2013 to 2016 was estimated from the Korea Health Panel survey. The median BMI for the entire  
16  
17 277 adult population is predicted to increase very slightly from 23.23 kg/m<sup>2</sup> in 2018 to 23.53 kg/m<sup>2</sup> in  
18  
19 278 2036 and is expected to remain steady thereafter. The predicted median BMI trends are similar for  
20  
21 279 men; the median BMI in adult men was projected to increase only slightly, from 23.74 kg/m<sup>2</sup> in 2018  
22  
23 280 to 23.95 kg/m<sup>2</sup> in 2036 and then almost plateau thereafter. On the other hand, women were expected  
24  
25 281 to experience a relatively steep rise compared to men; the median BMI in adult women was projected  
26  
27 282 to increase from 22.66 kg/m<sup>2</sup> in 2018 to 23.17 kg/m<sup>2</sup> in 2040.

28  
29  
30 283 [Insert Figure 2 here]

31  
32 284 The BMI distributions for men and women from 2012 to 2040 are shown in Figure 3. The  
33  
34 285 proportions of 'pre-obese' individuals in both sexes are predicted to increase dramatically over time,  
35  
36 286 while the proportions of individuals who are classified as 'normal' and 'obese' will gradually  
37  
38 287 decrease. As of 2025, 52.35% of all male adults were expected to be pre-obese, with that proportion  
39  
40 288 expected to be close to 81.23% by 2040. Moreover, 53.24% of all adult women are expected to be  
41  
42 289 'pre-obese' by 2035, with the proportion rising to almost 59.078% by 2040.

43  
44  
45 290 [Insert Figure 3A and 3B here]

46  
47 291

## 48 49 292 **DISCUSSION**

50  
51 293 The purpose of this study was to predict the prevalence of obesity in South Korea in the year  
52  
53 294 2040 using a microsimulation model. In this study, we strove to predict future adult obesity rates in  
54  
55 295 South Korea using the POHEM-BMI, which is developed by Statistics Canada. Summarizing the  
56  
57 296 predicted results, the median BMI of South Korea's adult population aged 19 years and older was  
58  
59 297 expected to be 23.55 in 2040, while the percentage of 'pre-obese' individuals was expected to

1  
2  
3 298 increase over time. While it is encouraging that the proportion of 'obese' people (i.e., those with  
4  
5 299 BMIs  $\geq 25$  kg/m<sup>2</sup>) in 2040 is predicted to be much lower than that in 2012, it is discouraging that the  
6  
7 300 proportion of 'normal' individuals is also markedly lower. Most notably, the pre-obesity rate is  
8  
9 301 predicted to rise dramatically. In addition to the sex and age of each individual, our model includes  
10  
11 302 only smoking and physical activity as health-related behaviors. The distributions of these factors were  
12  
13 303 assumed to remain equal across the years; hence, our data show that maintaining smoking and  
14  
15 304 physical activity rates at 2012 levels among adults will lead to a sharp increase in the 'pre-obese'  
16  
17 305 population by 2040.

18  
19  
20 306 To our knowledge, the only other study that predicted future obesity rates among South  
21  
22 307 Korean adults was the aforementioned investigation by Baik.[2] That study explored factors affecting  
23  
24 308 adult obesity as well as abdominal obesity, and constructed forecasting models to predict obesity  
25  
26 309 prevalence rates in 2020 and 2030 using the Korea National Health and Nutritional Examination  
27  
28 310 Survey (KNHANES). The prevalence rates of obesity among men and women in that study were  
29  
30 311 predicted to be 47% and 32%, respectively, in 2020 and 62% and 37%, respectively, in 2030; these  
31  
32 312 data were inconsistent with our own. The differences appeared to be caused by the different secondary  
33  
34 313 sources used in the 2 studies, as well as the different independent variables and prediction  
35  
36 314 methodologies. In particular, the obesity rate in the initial population according to the KNHANES  
37  
38 315 tended to be higher; as such, a higher initial prevalence rate would lead to a higher projection.[38]  
39  
40 316 Most importantly, Baik's study did not consider the preceding year's BMI, which was a major  
41  
42 317 independent variable in our study; this may be a major explanation for the differences in findings  
43  
44 318 between the 2 studies. We also compared our results to those predicted in Canada using the same  
45  
46 319 model we used; based on self-reported BMIs, approximately 59% of the adult Canadian population  
47  
48 320 was predicted to be 'overweight or obese' (i.e., BMIs  $> 25$  kg/m<sup>2</sup>) by 2030, which is a much higher  
49  
50 321 percentage than that predicted in South Korea (10.12%).

51  
52  
53 322 With reference to international comparisons, if the international BMI standard were to be  
54  
55 323 applied in our study, the results would be much more favorable given that a large proportion of  
56  
57 324 subjects would be classified as normal. However, this study defined obesity by applying the BMI  
58  
59 325 classification system according to 2018 Korean Society for the Study of Obesity guideline for the

1  
2  
3 326 management of obesity in Korea. Of course, it would be appropriate to use international standards in  
4  
5 327 international comparison, but it is necessary to reflect the situation of individual countries in the  
6  
7 328 management of obesity for the purpose of preventing and managing chronic diseases. Therefore,  
8  
9 329 rather than emphasizing the BMI classification criteria, more research is needed to analyze the BMI  
10  
11 330 values that can significantly predict the occurrence of chronic diseases. In other words, it is necessary  
12  
13 331 to continuously accumulate sufficient epidemiologic evidence for the relationship between the BMI  
14  
15 332 and the actual risk of disease and death for Koreans, and based on such evidence, efforts to establish  
16  
17 333 appropriate diagnostic and medical standards for Koreans are needed. In particular, the relationship is  
18  
19 334 likely to vary by age as well as sex, so it should be considered as well. In the meantime, the obesity  
20  
21 335 standard has been applied collectively regardless of sex and age. However, in order to deviate from a  
22  
23 336 uniform approach to obesity, gender- and age-based approaches are needed, considering the changes  
24  
25 337 in hormones and body composition.

26  
27  
28 338 Because health management policies including obesity management requires a large budget,  
29  
30 339 it is most important to establish cost-effective policies, and this requires selecting targets for policy  
31  
32 340 intervention. The results from this study made it possible to grasp the obese high-risk group by sex  
33  
34 341 and age group, and furthermore, it is expected to enable estimation of medical needs. As it is  
35  
36 342 necessary to apply obesity standards differently according to sex and age group, it is a similar problem  
37  
38 343 in setting goals of the 'National Health Promotion Comprehensive Plan'. The developing  
39  
40 344 governmental 'National Health Promotion Comprehensive Plan' needs to suggest additional, wider-  
41  
42 345 ranging goals considering the characteristics of each sex and age group, rather than presenting goals  
43  
44 346 for obesity prevalence among adult men and women. In this case, the goal should be presented at an  
45  
46 347 achievable level in consideration of future prediction patterns. Finally, systematic public health  
47  
48 348 interventions that are tailored to individual characteristics need to be established.

49  
50  
51 349 Findings from this study should be interpreted with consideration of several limitations.  
52  
53 350 First, since a microsimulation model for predicting obesity prevalence has not been developed in this  
54  
55 351 country, we borrowed the model developed by the Statistics Canada, and accordingly it is not built to  
56  
57 352 fit the domestic situation. Therefore, not only is the definition of obesity different, but the predictors  
58  
59 353 of BMI include only sex, age, smoking, physical activity, and preceding year's BMI values. In the

1  
2  
3 354 future, research to develop a new model of microsimulation in the field of healthcare for domestic  
4  
5 355 conditions will be very valuable. In this process, it is necessary to consider practical suitability and  
6  
7 356 efficiency in selecting basic data, module-specific behavioral equations, and variables for use in the  
8  
9 357 model. Second, it is a limitation of data sources. There is a difference between the current prevalence  
10  
11 358 of obesity calculated from the Korea Health Panel data used in this study and the Korea Health  
12  
13 359 Statistics using the KNHANES. As of 2011, the prevalence of adult obesity in Korea Health Statistics  
14  
15 360 was 31.9%, and the prevalence of adult obesity calculated by the Korea Health Panel data was 23.7%,  
16  
17 361 a difference of 8.2%.[39] Unlike the Korea Health Statistics, which contains body-measured height  
18  
19 362 and weight information, the Korea Health Panel (although this is a representative data source)  
20  
21 363 generates data based on self-reported by respondents, which may underestimate obesity. However, in  
22  
23 364 the POHEM-BMI model used in this study, the BMI of the previous year was regarded as the main  
24  
25 365 explanatory variable, and therefore, the Korea Health panel data that followed the same subject once a  
26  
27 366 year was inevitably used. In addition, the original POHEM-BMI model includes the process of  
28  
29 367 converting self-reported BMI into a measured BMI, but we omitted this due to limitations of the data  
30  
31 368 source.

32  
33  
34  
35 369 Nevertheless, our study's importance is that it is the first to examine the possibility of using  
36  
37 370 microsimulation to predict future BMI medians in South Korea. Additionally, it is important to note  
38  
39 371 that the BMI of the future adult population was predicted after considering the change in population  
40  
41 372 structure at the macro level as well as individual health behavior components at the micro level.

42  
43 373

## 44 374 **CONCLUSION**

45  
46  
47 375 The key finding of this study is that by 2040, 70.05% of Korean adults are predicted to be  
48  
49 376 pre-obese. Utilizing data sources available in Korea, the possibility of applying and expanding on the  
50  
51 377 concept of microsimulation was explored. In future studies, a model suitable for South Korea needs to  
52  
53 378 be developed, and the effectiveness of specific health policies ought to be assessed by applying  
54  
55 379 various relevant scenarios to the basic forecasting model.

56  
57 380

## 58 381 **Abbreviations**

382 BMI: body mass index; KNHANES: Korea National Health and Nutritional Examination  
383 Survey, POHEM: Population Health Model

#### 384 **Authors' Contributions**

385 YS (the first author) designed the study, analyzed and interpreted the data, and wrote the  
386 paper. YE participated in the statistical analysis. DS provided assistance in the interpretation of the  
387 data and preparation of the manuscript. SJ (the corresponding author) directed this study. All authors  
388 read and approved the final version of the manuscript.

#### 389 **Funding**

390 This work was supported by the National Research Foundation of Korea (NRF) grant funded  
391 by the Korea government (Ministry of Science and ICT) (No. 2017R1A2B4005876). The funding  
392 agency had no role in the study design, analysis and interpretation of the data, or the preparation of  
393 the manuscript.

#### 394 **Competing Interests**

395 The authors declare that they have no competing interests.

#### 396 **Ethics approval**

397 This study used publicly available data of Korea Health Panel Survey 2011-2012 from The  
398 Korea Institute for Health and Social Affairs and the National Health Insurance, population statistics  
399 based on resident registration, population projections, complete life tables and future mortality rates  
400 from Statistics Korea. The dataset does not contain any identifiable personal information. Ethical  
401 approval was given by the Institutional Review Board of Korea University, Seoul, Korea (IRB No.  
402 KUIRB-2020-0018-01).

403 **Provenance and peer review** Not commissioned; externally peer reviewed.

#### 404 **Data sharing statement**

405 The Korea Health Panel Survey data used in this article is available in  
406 <https://www.khp.re.kr:444/eng/data/data.do>. Detailed information on the survey design and data  
407 characteristics are provided at <https://www.khp.re.kr:444/eng/survey/sampling.do>. Population  
408 statistics, population projections, and complete life tables are available from <http://kosis.kr/eng/>.

1  
2  
3 409  
4  
5 410  
6  
7 411  
8  
9 412  
10  
11 413  
12  
13 414  
14  
15 415  
16  
17 416  
18  
19 417  
20  
21 418  
22  
23 419  
24  
25 420  
26  
27 421  
28  
29 422  
30  
31 423  
32  
33 424  
34  
35 425  
36  
37 426  
38  
39 427  
40  
41 428  
42  
43 429  
44  
45 430  
46  
47 431  
48  
49 432  
50  
51 433  
52  
53 434  
54  
55 435  
56  
57 436  
58  
59 437  
60  
438

## REFERENCES

1. Ng M, Fleming T, Robinson M, et al. Global, regional, and national prevalence of overweight and obesity in children and adults during 1980-2013: a systematic analysis for the Global Burden of Disease Study 2013. *Lancet* 2014;384:766–81. [https://doi.org/10.1016/S0140-6736\(14\)60460-8](https://doi.org/10.1016/S0140-6736(14)60460-8)
2. I Baik. Forecasting obesity prevalence in Korean adults for the years 2020 and 2030 by the analysis of contributing factors. *Nutr Res Pract* 2018;12:25–7. <https://dx.doi.org/10.4162/nrp.2018.12.3.251>
3. D Kim, C Ahn, SY Nam. Prevalence of obesity in Korea. *Obesity Rev* 2005;6:117–21. <https://doi.org/10.1111/j.1467-789X.2005.00173.x>
4. GBD 2017 Risk Factor Collaborators. Global, regional, and national comparative risk assessment of 84 behavioural, environmental and occupational, and metabolic risks or clusters of risks for 195 countries and territories, 1990-2017: a systematic analysis for the Global Burden of Disease Study 2017. *Lancet* 2018;392:1923–94. [https://doi.org/10.1016/S0140-6736\(18\)32225-6](https://doi.org/10.1016/S0140-6736(18)32225-6)
5. Okosun IS, Chandra KMD, Choi S, et al. Hypertension and type 2 diabetes comorbidity in adults in the United States: Risk of overall and regional adiposity. *Obes Res* 2001;9:1–9. <https://doi.org/10.1038/oby.2001.1>
6. Krauss RM, Winston M, Fletcher BJ, et al. Obesity: impact on cardiovascular disease. *Circulation* 1998;98:1472–6.
7. Chin K, Ohi M. Obesity and obstructive sleep apnea syndrome. *Intern Med* 1999;38:200–2. <https://doi.org/10.2169/internalmedicine.38.200>
8. Wallström P, Bjartell A, Gullberg B, et al. A prospective Swedish study on body size, body composition, diabetes, and prostate cancer risk. *Brit J Cancer* 2009;100:1799–805. <https://doi.org/10.1038/sj.bjc.6605077>
9. Guh DP, Zhang W, Bansback N, et al. The incidence of comorbidities related to obesity and overweight: a systematic review and meta-analysis. *BMC Public Health* 2009;9:88. <https://doi.org/10.1186/1471-2458-9-88>
10. Coggon D, Reading I, Croft P, et al. Knee osteoarthritis and obesity. *Int J Obes Relat Metab Disord* 2001;25:622–7. <https://doi.org/10.1038/sj.ijo.0801585>

- 1  
2  
3 439 11. Stenholm S, Rantanen T, Alanen E, et al. Obesity history as a predictor of walking limitation at old  
4 440 age. *Obesity* 2007;15:929–38. <https://doi.org/10.1038/oby.2007.583>  
5  
6  
7 441 12. Alley DE, Chang VW. The changing relationship of obesity and disability, 1988–2004. *JAMA*  
8 442 2007;298:2020–7. <https://doi.org/10.1001/jama.298.17.2020>  
9  
10 443 13. Larsson U, Karlsson J, Sullivan M. Impact of overweight and obesity on health-related quality of life–  
11 444 a Swedish population study. *Int J Obes Relat Metab Disord* 2002;26:417–24.  
12 445 <https://doi.org/10.1038/sj.ijo.0801919>  
13  
14 446 14. Zaninotto P, Pierce M, Breeze E, et al. BMI and waist circumference as predictors of well-being in  
15 447 older adults: findings from the English Longitudinal Study of Ageing. *Obesity* 2010;18:1981–7.  
16 448 <https://doi.org/10.1038/oby.2009.497>  
17  
18 449 15. Emerging Risk Factors Collaboration, Wormser D, Kaptoge S, et al. Separate and combined  
19 450 associations of body-mass index and abdominal adiposity with cardiovascular disease: Collaborative  
20 451 analysis of 58 prospective studies. *Lancet* 2011;377:1085–95. <https://doi.org/10.1016/S0140->  
21 452 6736(11)60105-0  
22  
23 453 16. The Global Burden of Metabolic Risk Factors for Chronic Diseases Collaboration (BMI Mediated  
24 454 Effects), Lu Y, Hajifathalian K, et al. Metabolic mediators of the effects of body-mass index,  
25 455 overweight, and obesity on coronary heart disease and stroke: A pooled analysis of 97 prospective  
26 456 cohorts with 1.8 million participants. *Lancet* 2014;383:970–83. <https://doi.org/10.1016/S0140->  
27 457 6736(13)61836-X  
28  
29 458 17. Renehan AG, Tyson M, Egger M, et al. Body-mass index and incidence of cancer: A systematic  
30 459 review and meta-analysis of prospective observational studies. *Lancet* 2008;371:569–78.  
31 460 [https://doi.org/10.1016/S0140-6736\(08\)60269-X](https://doi.org/10.1016/S0140-6736(08)60269-X)  
32  
33 461 18. Bhimjiyani A, Knuchel-Takano A, Hunt D, et al. Tipping the scales: Why preventing obesity makes  
34 462 economic sense. Technical Report 2016.  
35 463 [https://www.cancerresearchuk.org/sites/default/files/tipping\\_the\\_scales\\_-\\_cruk\\_full\\_report11.pdf](https://www.cancerresearchuk.org/sites/default/files/tipping_the_scales_-_cruk_full_report11.pdf)  
36 464 (accessed 26 Jan 2020).  
37  
38 465 19. Wang YC, McPherson K, Marsh T, et al. Health and economic burden of the projected obesity trends  
39 466 in the USA and the UK. *Lancet* 2011;378:815–25. [https://doi.org/10.1016/S0140-6736\(11\)60814-3](https://doi.org/10.1016/S0140-6736(11)60814-3)  
40  
41 467 20. Low S, Chin MC, Ma S, et al. Rationale for redefining obesity in Asians. *Ann Acad Med Singapore*  
42 468 2009;38:66–9.  
43  
44  
45  
46  
47  
48  
49  
50  
51  
52  
53  
54  
55  
56  
57  
58  
59  
60



- 1  
2  
3 469 21. The World Health Organization Western Pacific Region, International Association for the Study of  
4  
5 470 Obesity. *The Asia-Pacific Perspective: Redefining obesity and its treatment*. Sydney, Australia: Health  
6  
7 471 Communications Australia Pty Limited; 2000.
- 8  
9 472 22. Seo MH, Kim YH, Han K, et al. Prevalence of obesity and incidence of obesity-related comorbidities  
10  
11 473 in Koreans based on National Health Insurance Service Health Checkup Data 2006-2015 (*J Obes*  
12  
13 474 *Metab Syndr* 2018;27:46–52). *J Obes Metab Syndr* 2018;27:198–9.  
14  
15 475 <https://doi.org/10.7570/jomes.2018.27.3.198>
- 16  
17 476 23. Seo MH, Lee WY, Kim SS, et al. 2018 Korean Society for the Study of Obesity guideline for the  
18  
19 477 management of obesity in Korea. *J Obes Metab Syndr* 2019;28:40–5.  
20  
21 478 <https://doi.org/10.7570/jomes.2019.28.1.40>
- 22  
23 479 24. M Lee. Half of the socioeconomic costs of obesity are ‘medical costs’. *Korea Biomedical Review*  
24  
25 480 (2018, December 10). <http://www.docdocdoc.co.kr/news/articleView.html?idxno=1063317/>  
26  
27 481 (accessed 2020, January 29)
- 28  
29 482 25. Kang HT, Shim JY, Lee HR, et al. Trends in prevalence of overweight and obesity in Korean adults,  
30  
31 483 1998–2009: the Korean National Health and Nutrition Examination Survey. *J Epidemiol*  
32  
33 484 2014;24:109–16. <https://doi.org/10.2188/jea.je20130017>
- 34  
35 485 26. Khang YH, Yun SC. Trends in general and abdominal obesity among Korean adults: findings from  
36  
37 486 1998, 2001, 2005, and 2007 Korea National Health and Nutrition Examination Surveys. *J Korean*  
38  
39 487 *Med Sci* 2010;25:1582–8. <https://doi.org/10.3346/jkms.2010.25.11.1582>
- 40  
41 488 27. Yoo S, Cho HJ, Khang YH. General and abdominal obesity in South Korea, 1998–2007: gender and  
42  
43 489 socioeconomic differences. *Prev Med* 2010;51:460–5. <https://doi.org/10.1016/j.ypmed.2010.10.004>
- 44  
45 490 28. Kim D. *Estimation of disease and disease burden by health behavior*. Sejong City: Korea Institute for  
46  
47 491 Health and Social Affairs 2018.
- 48  
49 492 29. Çağlayan Ç, Terawaki H, Chen Q, et al. *Microsimulation Modeling in Oncology*. *JCO Clin Cancer*  
50  
51 493 *Inform* 2018;2:1–11. <https://doi.org/10.1200/CCI.17.00029>
- 52  
53 494 30. Hennessy D, Garner R, Flanagan WM, et al. Development of a population-based microsimulation  
54  
55 495 model of body mass index. *Health Rep* 2017;28:20–30.
- 56  
57 496 31. Spielauer M. Dynamic microsimulation of health care demand, health care finance and the economic  
58  
59 497 impact of health behaviours: survey and review. 2007 *International Journal of Microsimulation*  
60  
498 2007;1:35–53.

- 1  
2  
3 499 32. The National Academies of Sciences, Engineering, and Medicine. Assessing prevalence and trends in  
4 obesity: Navigating the evidence. Washington DC: The National Academies Press 2016.  
5 500  
6  
7 501 33. Soyiri IN, Reidpath DD. An overview of health forecasting. *Environ Health Prev Med* 2013;18:1–9.  
8  
9 502 <https://doi.org/10.1007/s12199-012-0294-6>  
10  
11 503 34. Pineda E, Sanchez-Romero LM, Brown M, et al. Forecasting future trends in obesity across Europe:  
12 The value of improving surveillance. *Obes Facts* 2018;11:360–71. <https://doi.org/10.1159/000492115>  
13 504  
14 505 35. Zucchelli E, Jones A, Rice N. The evaluation of health policies through dynamic microsimulation  
15 506 methods. *International Journal of Microsimulation* 2012;5:2–20.  
16  
17 507 36. Hennessy DA, Flanagan WM, Tanuseputro P, et al. The Population Health Model (POHEM): an  
18 508 overview of rationale, methods and applications. *Popul Health Metrics* 2015;13:24.  
19 509 <https://doi.org/10.1186/s12963-015-0057-x>  
20  
21 510 37. Manuel DG, Tuna M, Hennessy D, et al. Projections of preventable risks for cardiovascular disease in  
22 511 Canada to 2021: a microsimulation modelling approach. *CMAJ Open* 2014;2:E94–101.  
23 512 <https://doi.org/10.9778/cmajo.2012-0015>  
24  
25 513 38. Lin J, Thompson TJ, Cheng YJ, et al. Projection of the future diabetes burden in the United States  
26 514 through 2060. *Popul Health Metr* 2018;16:9. <https://doi.org/10.1186/s12963-018-0166-4>  
27  
28 515 39. Choi JS, Choi SE, Yeom AR, et al. A Report on the Korea Health Panel Survey of 2011. Korea  
29 516 Institute for Health and Affairs. 2013.  
30  
31  
32  
33  
34  
35  
36  
37  
38  
39  
40  
41  
42  
43  
44  
45  
46  
47  
48  
49  
50  
51  
52  
53  
54  
55  
56  
57  
58  
59  
60

**Figure 1** Summary of data sources and methods used to generate and validate projections of distribution of BMI categories in South Korea, 2012-2040

**Figure 2** Population Health Model (POHEM) projections of median BMI in South Korea, 2012-2040

**Figure 3A** Projection of distribution of BMI, Men aged 19 years and older, South Korea, 2012-2040

**Figure 3B** Projection of distribution of BMI, Women aged 19 years and older, South Korea, 2012-2040

**Figure 1** Summary of data sources and methods used to generate and validate projections of distribution of BMI categories in South Korea, 2012-2040



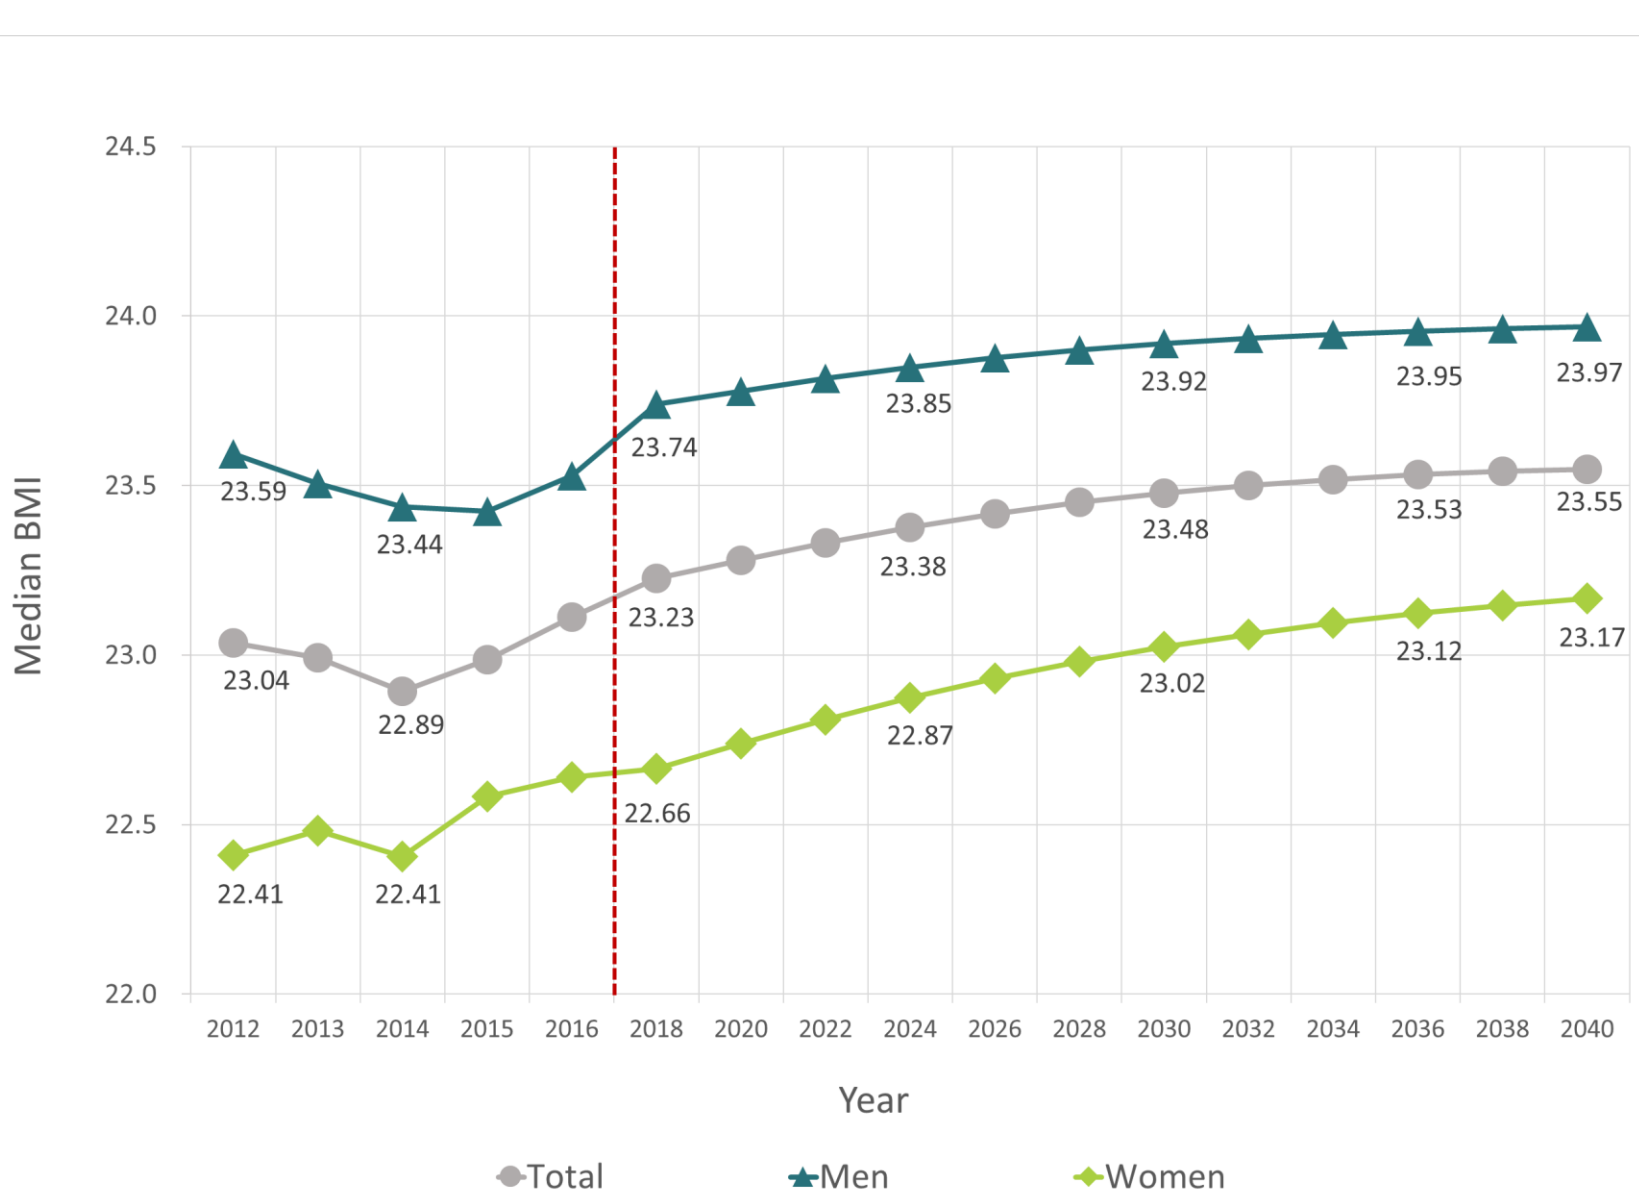

Figure 3 Projection of distribution of BMI, (A) Men and (B) Women, aged 19 years and older, South Korea, 2012-2040

1  
2  
3  
4  
5  
6  
7  
8  
9  
10  
11  
12  
13  
14  
15  
16  
17  
18  
19  
20  
21  
22  
23  
24  
25  
26  
27  
28  
29  
30  
31  
32  
33  
34  
35  
36  
37  
38  
39  
40  
41

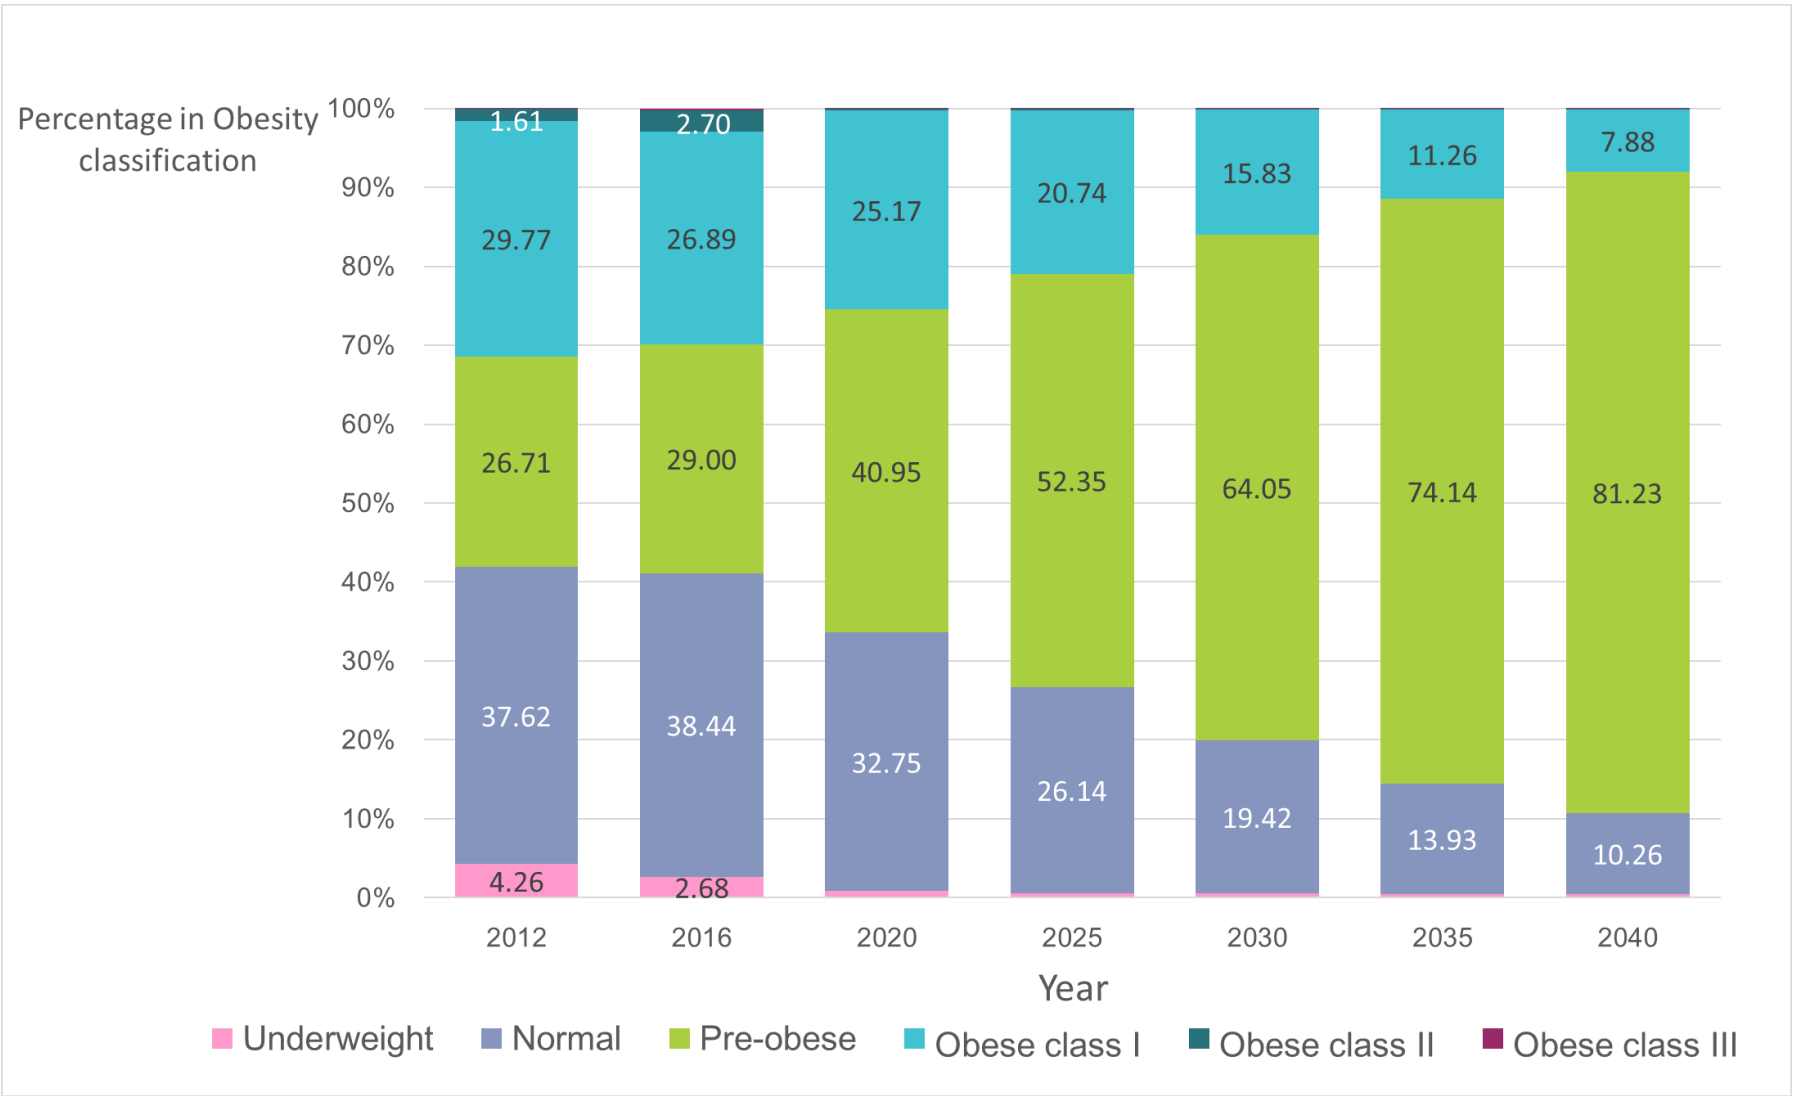

**Figure 3** Projection of distribution of BMI, (A) Men and (B) Women, aged 19 years and older, South Korea, 2012-2040

**B**

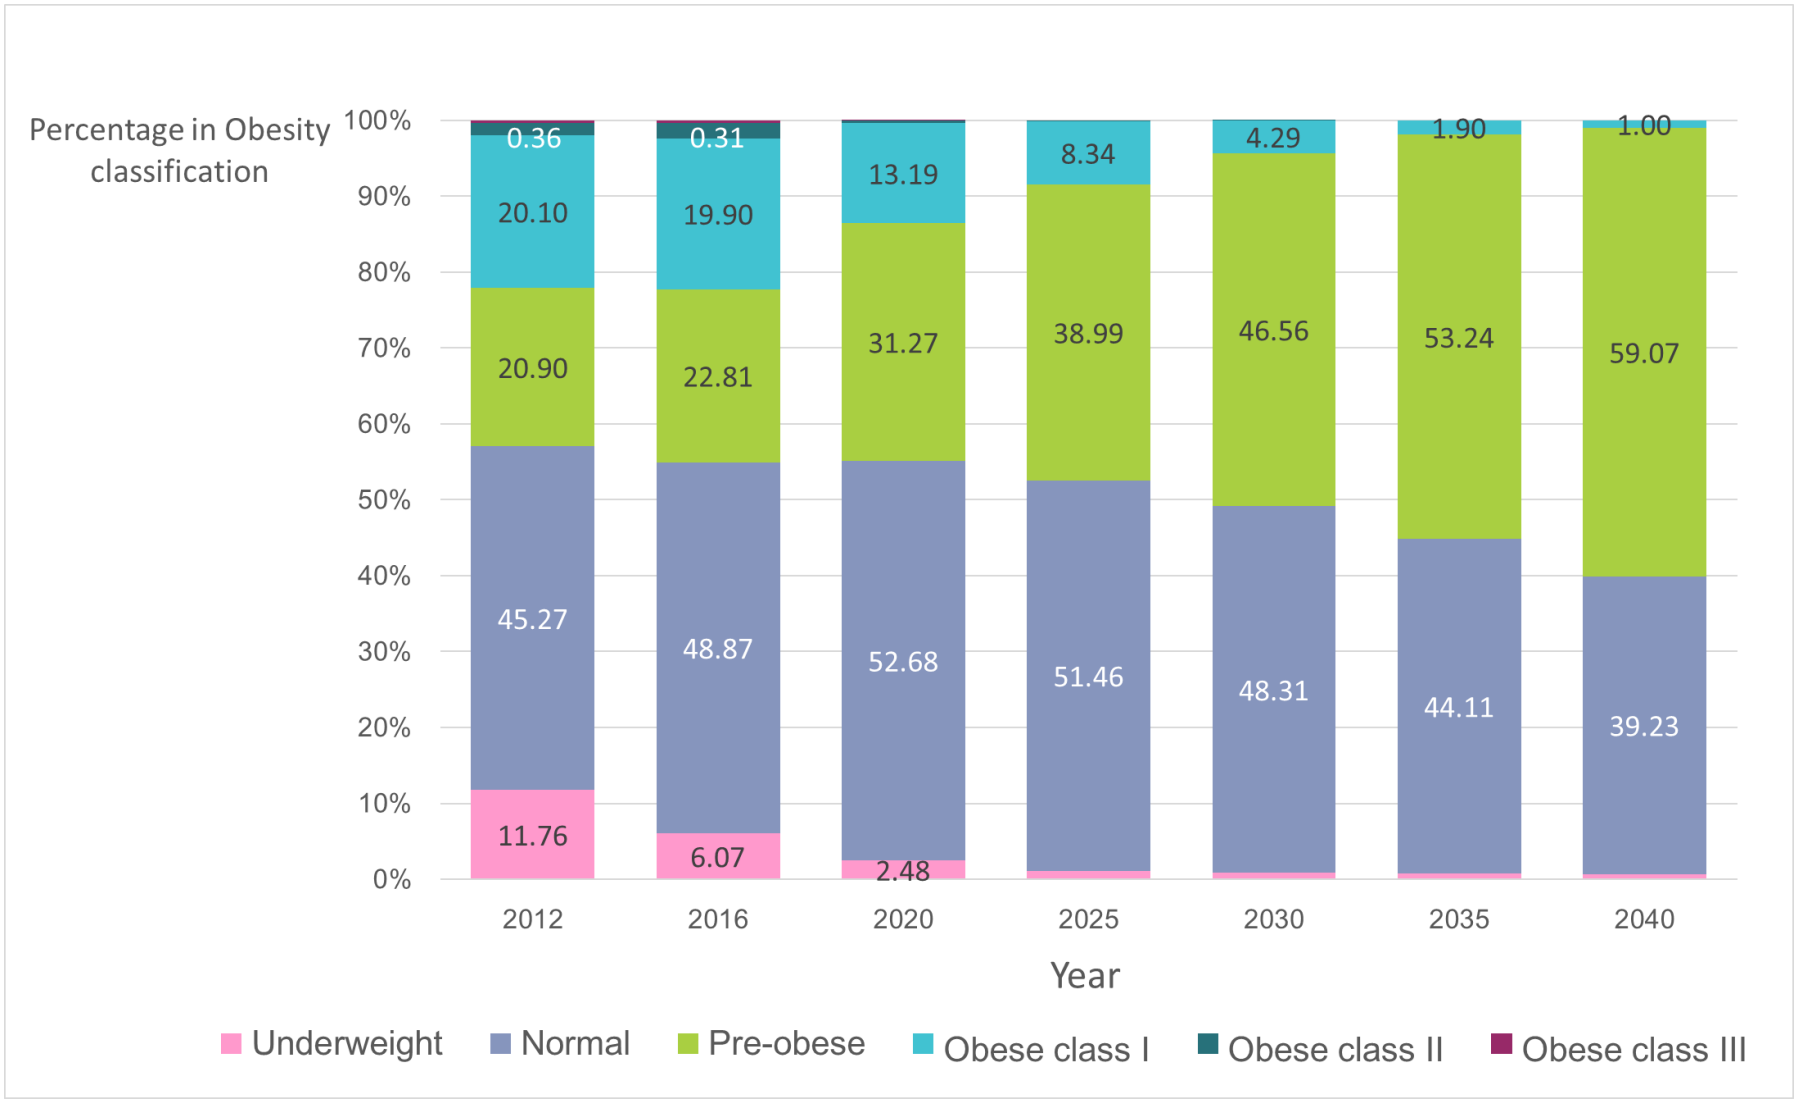

## STROBE Statement—checklist of items that should be included in reports of observational studies

|                              | Item No | Recommendation                                                                                                                                                                                                                                                                                                                                                                                                                                                         | Page No |
|------------------------------|---------|------------------------------------------------------------------------------------------------------------------------------------------------------------------------------------------------------------------------------------------------------------------------------------------------------------------------------------------------------------------------------------------------------------------------------------------------------------------------|---------|
| <b>Title and abstract</b>    | 1       | (a) Indicate the study's design with a commonly used term in the title or the abstract                                                                                                                                                                                                                                                                                                                                                                                 | 1-2     |
|                              |         | (b) Provide in the abstract an informative and balanced summary of what was done and what was found                                                                                                                                                                                                                                                                                                                                                                    | 2       |
| <b>Introduction</b>          |         |                                                                                                                                                                                                                                                                                                                                                                                                                                                                        |         |
| Background/rationale         | 2       | Explain the scientific background and rationale for the investigation being reported                                                                                                                                                                                                                                                                                                                                                                                   | 4-7     |
| Objectives                   | 3       | State specific objectives, including any prespecified hypotheses                                                                                                                                                                                                                                                                                                                                                                                                       | 6-7     |
| <b>Methods</b>               |         |                                                                                                                                                                                                                                                                                                                                                                                                                                                                        |         |
| Study design                 | 4       | Present key elements of study design early in the paper                                                                                                                                                                                                                                                                                                                                                                                                                | 7       |
| Setting                      | 5       | Describe the setting, locations, and relevant dates, including periods of recruitment, exposure, follow-up, and data collection                                                                                                                                                                                                                                                                                                                                        | 7-8     |
| Participants                 | 6       | (a) <i>Cohort study</i> —Give the eligibility criteria, and the sources and methods of selection of participants. Describe methods of follow-up<br><i>Case-control study</i> —Give the eligibility criteria, and the sources and methods of case ascertainment and control selection. Give the rationale for the choice of cases and controls<br><i>Cross-sectional study</i> —Give the eligibility criteria, and the sources and methods of selection of participants | 8-9     |
|                              |         | (b) <i>Cohort study</i> —For matched studies, give matching criteria and number of exposed and unexposed<br><i>Case-control study</i> —For matched studies, give matching criteria and the number of controls per case                                                                                                                                                                                                                                                 | -       |
| Variables                    | 7       | Clearly define all outcomes, exposures, predictors, potential confounders, and effect modifiers. Give diagnostic criteria, if applicable                                                                                                                                                                                                                                                                                                                               | 7-9     |
| Data sources/<br>measurement | 8*      | For each variable of interest, give sources of data and details of methods of assessment (measurement). Describe comparability of assessment methods if there is more than one group                                                                                                                                                                                                                                                                                   | 7-9     |
| Bias                         | 9       | Describe any efforts to address potential sources of bias                                                                                                                                                                                                                                                                                                                                                                                                              | 8-9     |
| Study size                   | 10      | Explain how the study size was arrived at                                                                                                                                                                                                                                                                                                                                                                                                                              | 7       |
| Quantitative variables       | 11      | Explain how quantitative variables were handled in the analyses. If applicable, describe which groupings were chosen and why                                                                                                                                                                                                                                                                                                                                           | 7       |
| Statistical methods          | 12      | (a) Describe all statistical methods, including those used to control for confounding                                                                                                                                                                                                                                                                                                                                                                                  | 7-9     |
|                              |         | (b) Describe any methods used to examine subgroups and interactions                                                                                                                                                                                                                                                                                                                                                                                                    | 8-9     |
|                              |         | (c) Explain how missing data were addressed                                                                                                                                                                                                                                                                                                                                                                                                                            | 8-9     |
|                              |         | (d) <i>Cohort study</i> —If applicable, explain how loss to follow-up was addressed<br><i>Case-control study</i> —If applicable, explain how matching of cases and controls was addressed<br><i>Cross-sectional study</i> —If applicable, describe analytical methods taking account of sampling strategy                                                                                                                                                              | 8-9     |
|                              |         | (e) Describe any sensitivity analyses                                                                                                                                                                                                                                                                                                                                                                                                                                  | -       |

Continued on next page

| <b>Results</b>           |     |                                                                                                                                                                                                              |       |
|--------------------------|-----|--------------------------------------------------------------------------------------------------------------------------------------------------------------------------------------------------------------|-------|
| Participants             | 13* | (a) Report numbers of individuals at each stage of study—eg numbers potentially eligible, examined for eligibility, confirmed eligible, included in the study, completing follow-up, and analysed            | 10-13 |
|                          |     | (b) Give reasons for non-participation at each stage                                                                                                                                                         | -     |
|                          |     | (c) Consider use of a flow diagram                                                                                                                                                                           | -     |
| Descriptive data         | 14* | (a) Give characteristics of study participants (eg demographic, clinical, social) and information on exposures and potential confounders                                                                     | 10-12 |
|                          |     | (b) Indicate number of participants with missing data for each variable of interest                                                                                                                          | 10-12 |
|                          |     | (c) <i>Cohort study</i> —Summarise follow-up time (eg, average and total amount)                                                                                                                             | 10-12 |
| Outcome data             | 15* | <i>Cohort study</i> —Report numbers of outcome events or summary measures over time                                                                                                                          | 13    |
|                          |     | <i>Case-control study</i> —Report numbers in each exposure category, or summary measures of exposure                                                                                                         | -     |
|                          |     | <i>Cross-sectional study</i> —Report numbers of outcome events or summary measures                                                                                                                           | -     |
| Main results             | 16  | (a) Give unadjusted estimates and, if applicable, confounder-adjusted estimates and their precision (eg, 95% confidence interval). Make clear which confounders were adjusted for and why they were included | 11-12 |
|                          |     | (b) Report category boundaries when continuous variables were categorized                                                                                                                                    | 11    |
|                          |     | (c) If relevant, consider translating estimates of relative risk into absolute risk for a meaningful time period                                                                                             | -     |
| Other analyses           | 17  | Report other analyses done—eg analyses of subgroups and interactions, and sensitivity analyses                                                                                                               | -     |
| <b>Discussion</b>        |     |                                                                                                                                                                                                              |       |
| Key results              | 18  | Summarise key results with reference to study objectives                                                                                                                                                     | 13-14 |
| Limitations              | 19  | Discuss limitations of the study, taking into account sources of potential bias or imprecision. Discuss both direction and magnitude of any potential bias                                                   | 15-16 |
| Interpretation           | 20  | Give a cautious overall interpretation of results considering objectives, limitations, multiplicity of analyses, results from similar studies, and other relevant evidence                                   | 14-16 |
| Generalisability         | 21  | Discuss the generalisability (external validity) of the study results                                                                                                                                        | 15    |
| <b>Other information</b> |     |                                                                                                                                                                                                              |       |
| Funding                  | 22  | Give the source of funding and the role of the funders for the present study and, if applicable, for the original study on which the present article is based                                                | 17    |

\*Give information separately for cases and controls in case-control studies and, if applicable, for exposed and unexposed groups in cohort and cross-sectional studies.

**Note:** An Explanation and Elaboration article discusses each checklist item and gives methodological background and published examples of transparent reporting. The STROBE checklist is best used in conjunction with this article (freely available on the Web sites of PLoS Medicine at <http://www.plosmedicine.org/>, Annals of Internal Medicine at <http://www.annals.org/>, and Epidemiology at <http://www.epidem.com/>). Information on the STROBE Initiative is available at [www.strobe-statement.org](http://www.strobe-statement.org).



# BMJ Open

## Projecting the prevalence of obesity in South Korea through 2040: a microsimulation modeling approach

|                                 |                                                                                                                                                                                                                                                                                                                                                                                                                                                                                                                               |
|---------------------------------|-------------------------------------------------------------------------------------------------------------------------------------------------------------------------------------------------------------------------------------------------------------------------------------------------------------------------------------------------------------------------------------------------------------------------------------------------------------------------------------------------------------------------------|
| Journal:                        | <i>BMJ Open</i>                                                                                                                                                                                                                                                                                                                                                                                                                                                                                                               |
| Manuscript ID                   | bmjopen-2020-037629.R2                                                                                                                                                                                                                                                                                                                                                                                                                                                                                                        |
| Article Type:                   | Original research                                                                                                                                                                                                                                                                                                                                                                                                                                                                                                             |
| Date Submitted by the Author:   | 31-Oct-2020                                                                                                                                                                                                                                                                                                                                                                                                                                                                                                                   |
| Complete List of Authors:       | Jung, Yoon-Sun; Korea University, Department of Public Health, Graduate School, Korea University, Seoul, Korea<br>Kim, Young-Eun ; National Health Insurance Service, Big Data Department, National Health Insurance Service, Wonju, Korea<br>Go, Dun-Sol; Korea Institute for Health and Social Affairs, Department of Health Care Policy Research, Korea Institute for Health and Social Affairs<br>Yoon, Seok-Jun; Korea University, Department of Preventive Medicine, Korea University College of Medicine, Seoul, Korea |
| <b>Primary Subject Heading</b>: | Public health                                                                                                                                                                                                                                                                                                                                                                                                                                                                                                                 |
| Secondary Subject Heading:      | Health policy                                                                                                                                                                                                                                                                                                                                                                                                                                                                                                                 |
| Keywords:                       | PUBLIC HEALTH, Health policy < HEALTH SERVICES ADMINISTRATION & MANAGEMENT, PREVENTIVE MEDICINE                                                                                                                                                                                                                                                                                                                                                                                                                               |
|                                 |                                                                                                                                                                                                                                                                                                                                                                                                                                                                                                                               |

SCHOLARONE™  
Manuscripts



I, the Submitting Author has the right to grant and does grant on behalf of all authors of the Work (as defined in the below author licence), an exclusive licence and/or a non-exclusive licence for contributions from authors who are: i) UK Crown employees; ii) where BMJ has agreed a CC-BY licence shall apply, and/or iii) in accordance with the terms applicable for US Federal Government officers or employees acting as part of their official duties; on a worldwide, perpetual, irrevocable, royalty-free basis to BMJ Publishing Group Ltd ("BMJ") its licensees and where the relevant Journal is co-owned by BMJ to the co-owners of the Journal, to publish the Work in this journal and any other BMJ products and to exploit all rights, as set out in our [licence](#).

The Submitting Author accepts and understands that any supply made under these terms is made by BMJ to the Submitting Author unless you are acting as an employee on behalf of your employer or a postgraduate student of an affiliated institution which is paying any applicable article publishing charge ("APC") for Open Access articles. Where the Submitting Author wishes to make the Work available on an Open Access basis (and intends to pay the relevant APC), the terms of reuse of such Open Access shall be governed by a Creative Commons licence – details of these licences and which [Creative Commons](#) licence will apply to this Work are set out in our licence referred to above.

Other than as permitted in any relevant BMJ Author's Self Archiving Policies, I confirm this Work has not been accepted for publication elsewhere, is not being considered for publication elsewhere and does not duplicate material already published. I confirm all authors consent to publication of this Work and authorise the granting of this licence.

1 **Title: Projecting the prevalence of obesity in South Korea through 2040: a**  
2 **microsimulation modeling approach**

3  
4 **Authors:** Yoon-Sun Jung <sup>a\*</sup>, Young-Eun Kim<sup>b</sup>, Dun-Sol Go<sup>c</sup>, Seok-Jun Yoon<sup>d</sup>

5 **Affiliations:**

6 <sup>a</sup>Department of Public Health, Graduate School, Korea University, Seoul, Korea

7 <sup>b</sup>Big Data Department, National Health Insurance Service, Wonju, Korea

8 <sup>c</sup>Department of Health Care Policy Research, Korea Institute for Health and Social Affairs

9 <sup>d</sup>Department of Preventive Medicine, Korea University College of Medicine, Seoul, Korea

10 **Corresponding author:**

11 Seok-Jun Yoon, M.D., Ph.D.

12 Department of Preventive Medicine, Korea University College of Medicine,

13 73, Goryeodae-ro, Seongbuk-gu, Seoul, 02841, Korea

14 E-mail: yoonsj02@korea.ac.kr

15  
16 **E-mail addresses:**

17 sunnyaaurora@nate.com (Yoon-Sun Jung)

18 kimyes4454@gmail.com (Young-Eun Kim)

19 kds237@gmail.com (Dun-Sol Go)

20  
21 **Keywords:** Microsimulation, body mass index, obesity, Population Health Model, South

22 Korea

23  
24 **Word count:** 4,373

25

**ABSTRACT**

**Objective** To project the prevalence of obesity in 2040 among individuals 19 years and older in South Korea.

**Design, setting, and participants** Using the ‘Population Health Model-Body Mass Index’ (POHEM-BMI) microsimulation model, the prevalence of obesity in Korean adults 19 years and older was projected until 2040. The model integrated individual survey data from the Korea Health Panel Survey of 2011 and 2012, population statistics based on resident registration, population projections, and complete life tables categorized by sex and age. Birth rate, life expectancy, and international migration were based on a medium growth scenario. The base population of Korean adults in 2012, devised through data aggregation, was 39,842,730. The prediction equations were formulated using BMI as the dependent variable; the individual’s sex, age, smoking status, physical activity, and preceding year’s BMI were used as predictive factors.

**Outcome measure** BMI categorized by sex.

**Results** The median BMI for Korean adults in 2040 was forecast to be 23.55 kg/m<sup>2</sup> (23.97 and 23.17 kg/m<sup>2</sup> for men and women, respectively). According to the Korean BMI classification, 70.05% of all adults were forecast to be ‘pre-obese’ (i.e., have BMIs 23 to 24.9) by 2040 (81.23% of men and 59.07% of women) and 24.88% to be ‘normal’.

**Conclusions** We explored the possibility of applying and expanding on the concept of microsimulation in the field of healthcare by combining data sources available in Korea and found that more than half of the adults in this study population will be pre-obese, and the proportions of “obesity” and “normal” will decrease compared with those in 2012. The results of our study will aid in devising healthy strategies and spreading public awareness for preventing this condition.

1  
2  
3 51  
4  
5 52  
6  
7  
8 53  
9  
10 54  
11  
12 55  
13  
14 56  
15  
16 57  
17  
18 58  
19  
20 59  
21  
22 60  
23  
24 61  
25  
26 62  
27  
28 63  
29  
30 64  
31  
32 65  
33  
34 66  
35  
36  
37  
38  
39  
40  
41  
42  
43  
44  
45  
46  
47  
48  
49  
50  
51  
52  
53  
54  
55  
56  
57  
58  
59  
60

### **Strengths and limitations of this study**

- To the best of our knowledge, this is the first study to use a microsimulation model to predict future obesity prevalence in Korea considering the change in population structure (macro level) as well as individual health behavior components (micro level).
- The results of our study aid in suggesting additional and wider-ranging strategies for obesity prevention by considering sex and age group in the formulation of the ‘National Health Promotion Comprehensive Plan’.
- Although a representative data source was used in this study, the prevalence of obesity may be underestimated because it is based on a self-reported BMI value.
- This study uses a micro-simulation model developed abroad, and hence, may not reflect the domestic situations accurately.
- Another limitation is that we assumed the attributes of 19-year-old individuals to remain similar each year.

## 67 **BACKGROUND**

68 The prevalence of overweight and obesity has increased markedly over the past 3 decades,  
69 and concerns about health risks associated with obesity have become almost universal.[1]

70 The increasing rate of obesity is a growing public health concern not only in Western  
71 countries but also in South Korea.[2] From the 1990s through the beginning of the new  
72 millennium, the prevalence of adult and child obesity has increased rapidly and continues to  
73 rise steadily in parallel with rapid social and economic development.[3]

74 Obesity is not only a major public health problem in itself, but also a factor in the  
75 development of many chronic diseases; hence, it constitutes a strain on individuals and health  
76 systems worldwide. It is associated with an increased risk of many disorders, including  
77 diabetes, hypertension, dyslipidemia, heart disease, stroke, sleep apnea, early death, and  
78 cancer.[4-8] Moreover, obesity among older people increases the risk of knee  
79 osteoarthritis[9] and reduces functional capacity and quality of life.[10-13] The prevalence of  
80 these conditions rises in proportion to the increase in obesity[14-17] and is associated with  
81 increased economic costs for both individuals and the society at large.[18] A study of data  
82 from the National Health Insurance Service in Korea found that the socioeconomic cost of  
83 obesity in 2016 was approximately 9,665.32 million US dollars.[19]

84 Meanwhile, with respect to worldwide comparisons, whether cutoff points for  
85 overweight and obesity should be lower for Asians than for another ethnic groups remains  
86 debatable.[20] The World Health Organization has proposed BMIs of 18.5–22.9 kg/m<sup>2</sup> as  
87 optimal, 23–24.9 kg/m<sup>2</sup> as overweight, 25–29.9 kg/m<sup>2</sup> as moderate obesity, and  $\geq 30$  kg/m<sup>2</sup>  
88 as severe obesity for Asians.[21] The Korean Society of Obesity, which was established to  
89 improve obesity management through research and education, revised its clinical practical  
90 guidelines for the prevention and treatment of obesity in 2018. The new guidelines renamed  
91 the “overweight” category to "pre-obese", and divided obesity into 3 categories, thereby

1  
2  
3 92 aiming to highlight the risk of obesity instead of promoting the term "overweight." The most  
4  
5 93 recent guidance is based in part on data of 84,690,131 Korean adults extracted from the  
6  
7  
8 94 Korean National Health Insurance Service Health Checkup Database between 2006 and 2015.  
9  
10 95 By including the entire population registered in the National Health Insurance Service  
11  
12 96 Database, they calculated the first and second cutoff points corresponding to the increased  
13  
14 97 risk of any of the 3 accompanying diseases (type 2 diabetes, hypertension, and dyslipidemia)  
15  
16 98 The first cutoff BMI level was 23 kg/m<sup>2</sup>, and the second cutoff BMI level was 25 kg/m<sup>2</sup>,  
17  
18 99 suggesting the necessity of obesity criteria that accurately reflect the risk of chronic disease  
19  
20  
21 100 among Koreans.[22,23]

22  
23  
24 101 Although numerous investigators in other countries have attempted to predict the  
25  
26 102 future prevalence of obesity, only one such study by Inkyung Baik was recently performed in  
27  
28 103 South Korea.[2] More recent trends still need to be investigated through predictive studies,  
29  
30 104 and the accurate prediction of obesity prevalence remains an important public health-related  
31  
32 105 goal in the country. To efficiently establish and execute an effective healthcare policy, which  
33  
34 106 would require a large budget, it is necessary to select future targets for policy interventions  
35  
36 107 (such as high-risk groups) to predict healthcare needs and prevent budget waste.  
37  
38  
39

40 108 Past prediction models incorporated a country's entire population; as such,  
41  
42 109 macroscopic inferences based on average projections for the future society were generalized.  
43  
44 110 However, when establishing a healthcare policy, it is necessary to estimate the future disease  
45  
46 111 burden and medical needs of the entire population based on future projections that reflect  
47  
48 112 individual characteristics because a real-world understanding of factors that are influenced by  
49  
50 113 policies or institutions is required. Individuals are independent entities with different  
51  
52 114 characteristics and needs that govern their future decisions and behaviors. By applying these  
53  
54 115 needs, health-related projections can be modeled to reflect health risk factors such as sex,  
55  
56 116 age, life cycle activities, smoking, etc., and the effects of policy interventions can be  
57  
58  
59  
60

1  
2  
3 117 quantified.[24] In this regard, we aimed to predict the prevalence of obesity in Korea by  
4  
5 118 using microsimulation, which is optimal for considering individual properties.  
6  
7

8 119         Microsimulation is a modeling technique, which typically uses individual microunits,  
9  
10 120 each with its own set of properties, to simulate downstream events based on the probability of  
11  
12 121 transition between predefined states and their changes over time. When used in medicine,  
13  
14 122 microsimulation can be particularly powerful because it preserves the patterns of previous  
15  
16 123 behaviors and conditions, and allows for a clearer representation and understanding of how  
17  
18 124 various processes affect the total outcome of the population over time.[25] Given macro-  
19  
20 125 effects such as changes in population structures in the forecasting model, microsimulation is  
21  
22 126 very useful as it can estimate both disease burdens and medical needs across the country.[24]  
23  
24 127 Microsimulation modeling is particularly useful for studying BMI trends because it can  
25  
26 128 simultaneously explain population dynamics such as aging and mortality. Additionally, the  
27  
28 129 longitudinal framework of these models allows for interpreting a person's change in BMI as  
29  
30 130 it is affected by factors such as a person's physical activity and behavior, and thus, acts as a  
31  
32 131 contributing factor for other diseases.[26] However, while microsimulation models have been  
33  
34 132 steadily evolving across health- and economy-related fields in many European countries,[27]  
35  
36 133 they are yet to be actively utilized in South Korea (especially for healthcare).  
37  
38  
39  
40

41  
42 134         Obesity prevalence and trend estimates provide important information for research,  
43  
44 135 policy, and intervention.[28] Because health forecasting predicts disease episodes and  
45  
46 136 portends future events, it facilitates healthcare strategies by promoting the setting of goals to  
47  
48 137 reduce obesity, establish health promotion interventions, and optimize resource  
49  
50 138 allocation.[29] Obesity trends may also be used to urge governments to implement  
51  
52 139 preventative approaches for reducing obesity.[30] Based on the above findings, we performed  
53  
54 140 this study to project the future trends in obesity prevalence in South Korea up to the year  
55  
56 141 2040.  
57  
58  
59  
60



1  
2  
3 1424  
5 143 **METHODS**6  
7  
8 144 **Model**

9  
10 145 We used the Population Health Model (POHEM)-BMI to estimate the prevalence of  
11  
12 146 obesity among adults 19 years and older in South Korea from 2012 through 2040. In brief,  
13  
14 147 POHEM is a time-continuous, population-based, dynamic microsimulation model with  
15  
16 148 individual underlying units of analysis used worldwide. Dynamic microsimulation, in the  
17  
18 149 context of social science and population health, is a simulation of individuals (i.e., micro-  
19  
20 150 level) and their behaviors, statuses, and actions (dynamics) over time.[31] These are modeled  
21  
22 151 as desired using multiple sources of empirical data, including cross-sectional surveys,  
23  
24 152 administrative databases, vital statistics, and census data.[32]  
25  
26 153 Through dynamic simulation, POHEM creates a population and ages it, one person at a time,  
27  
28 154 until death.[33] The model dynamically simulates an individual's disease state, risk factors,  
29  
30 155 and health determinants to describe and plan health outcomes.[32] POHEM is accessible  
31  
32 156 because it wants the general process to be constant across the country's population, with the  
33  
34 157 exception of variables unique to each country, such as marriage and mortality. The POHEM  
35  
36 158 models include cardiovascular disease, various cancers, osteoarthritis, physical activity, and  
37  
38 159 neurological events. The model used in this study was the POHEM-BMI; the performance of  
39  
40 160 each prediction step is shown in Figure 1.

41  
42  
43  
44  
45  
46  
47 161 **Base population**

48  
49 162 To create the base population for the POHEM-BMI model, we used the 2011–2012 Korea  
50  
51 163 Health Panel survey and the resident registration-based population statistics. The base  
52  
53 164 population for POHEM-BMI (n=39,842,730), reflected the Korean population. Each Korean  
54  
55 165 respondent 19 years of age and older (n=11,501) in 2012 was replicated using their survey-  
56  
57 166 recorded weights to generate a simulated cohort of approximately 39,842,730 individuals.  
58  
59  
60

1  
2  
3 167 Korea Health Panel survey data are nationally representative, and incorporate health status,  
4  
5 168 chronic diseases, health risk behaviors, and socio-demographic characteristics. Among them,  
6  
7  
8 169 we extracted sex, age, current smoking status, physical activity, and the previous and current  
9  
10 170 years' BMI values; these variables were required for the predictive equation. We then used a  
11  
12 171 multiple linear regression model to estimate the BMI value using the extracted independent  
13  
14 172 variables as predictors. The POHEM-BMI model is auto-regressive and includes previous  
15  
16 173 BMI values as a main explanatory variable.[26] For comparison with other international  
17  
18 174 studies using this model, the variable composition was the same, but the variable definition  
19  
20 175 was not. The definition of variables was consistent with the definition of indicators in the  
21  
22 176 Korea Health Statistics. A current smoker was an individual who reported smoking 'every  
23  
24 177 day' or 'sometimes'. Practicing physical activity was defined as performing either intense  
25  
26 178 physical activity for at least 10 continuous minutes a day, 20 minutes total per day, 3 days a  
27  
28 179 week during the preceding week, or moderate physical activity for at least 30 minutes a day,  
29  
30 180 5 days a week during the preceding week. Height and weight, which are components of BMI,  
31  
32 181 were based on self-reported data.

### 182 **Simulation: Annual updates and risk transition**

33  
34  
35  
36  
37  
38 183 The study population was updated by aging each person by 1 year and changing the total  
39  
40 184 population size based on population statistics, population projections, and complete life tables  
41  
42 185 categorized by sex and age from Korean Statistics. For population projections, we assumed a  
43  
44 186 medium growth scenario in terms of birth rate, life expectancy, and international migration.  
45  
46 187 Each person's BMI was updated annually by applying a predictive equation that incorporates  
47  
48 188 his/her own characteristics. The transition probability for each stochastic characteristic was  
49  
50 189 calculated based on a generalized linear model.

51  
52  
53  
54  
55  
56 190 We assumed that the current individual behavioral patterns persisted, and no new  
57  
58 191 factors arose to prevent obesity, like the original POHEM-BMI. We also assumed that the  
59  
60

1  
2  
3 192 attributes of 19-year-old individuals, which were entered annually, remained similar each  
4  
5 193 year.

#### 8 194 **Model validation and calibration**

10 195 We established the model's validity by comparing the projected BMI median  
11  
12 196 obtained from the prediction model to estimates obtained from the Korea Health Panel  
13  
14 197 survey. We set the calibration cutoff point to 5% and adjusted the model by comparing the  
15  
16 198 difference between the median BMI estimates observed from the Korea Health Panel survey  
17  
18 199 and the values derived from the prediction model categorized by sex and age. We analyzed  
19  
20 200 the BMIs of each group by comparing the 2016 data available from the Korea Health Panel  
21  
22 201 with the most recent data. We accepted a difference of less than 5% overall in the sex- and  
23  
24 202 age-categorized groups. Finally, we adjusted the demographics of the 2040 population so that  
25  
26 203 the predictions were within a 5% margin of error. In this study, all necessary data for model  
27  
28 204 building and projection were obtained from publicly available data and does not include any  
29  
30 205 identifiable personal information. Hence, no ethical approval was required, in addition to the  
31  
32 206 ethical and governance approvals granted by the Korea Institute for Health and Social Affairs  
33  
34 207 (KIHASA), which conducts the Korea Health Panel Survey. All participants gave written  
35  
36 208 informed consent before they completed the survey.

#### 42 209 **Projection**

44 210 The model projected the BMI of each person from 2017 to 2040. Based on demographic  
45  
46 211 characteristics, the projections were then aggregated by year for each of the predefined  
47  
48 212 subgroups. The various trends observed in the Korean population data were used to generate  
49  
50 213 algorithms that were applied to future projections.

#### 54 214 **Model outputs**

56 215 The BMI distributions were calculated overall and by sex. Individuals with a BMI  $\geq 25$   
57  
58 216 kg/m<sup>2</sup> were obese according to the Guidelines for the Management of Obesity in Korea,  
59  
60

217 which is not the internationally accepted standard (Table 1). All analyses in this study were  
 218 performed using STATA version 13 (StataCorp LLC, College Station, TX, USA).

219

220 **Table 1** BMI classification of South Korea

| Classification  | Body mass index<br>(kg/m <sup>2</sup> ) |
|-----------------|-----------------------------------------|
| Underweight     | < 18.5                                  |
| Normal          | 18.5 – 22.9                             |
| Pre-obese       | 23 – 24.9                               |
| Obese class I   | 25 – 29.9                               |
| Obese class II  | 30 – 34.9                               |
| Obese class III | ≥ 35                                    |

221

222 **Patient and public involvement**

223 No patient involved

224

225 **RESULTS**

226 We compared the total number of the individuals and their characteristics in the  
 227 initial 2012 population to those in the projected 2040 population (Table 2). There were  
 228 39,842,730 adults who were 19 years of age or older in 2012 and 43,818,808 in 2040. The  
 229 male: female ratio was nearly 1:1 in both 2012 and 2040. Rapid aging of the Korean  
 230 population was clearly observed when comparing the 2 populations. The average age of  
 231 adults was expected to increase by 10.9 years (from 45.69 years in 2012 to 56.59 years in

1  
2  
3 232 2040 [from 44.57 to 55.54 years among men and 46.77 to 57.63 years among women]). In  
4  
5 233 2012, the proportion of young people (those in the 19–39 and 40–64-year age groups  
6  
7 234 combined) accounted for approximately 85.54% of the adult population, while the proportion  
8  
9 235 of individuals aged 65 years and older was relatively low at approximately 14%. However,  
10  
11 236 the age group structure in South Korea 28 years later (2040) is predicted to be quite different,  
12  
13 237 as the proportion of individuals 19–64 years (i.e., the working age population) was only  
14  
15 238 60.95% of the adult population, while the proportion of the elderly population ( $\geq 65$  years)  
16  
17 239 was estimated to be almost 40% of the total adult population.  
18  
19  
20  
21  
22  
23  
24  
25  
26  
27  
28  
29  
30  
31  
32  
33  
34  
35  
36  
37  
38  
39  
40  
41  
42  
43  
44  
45  
46  
47  
48  
49  
50  
51  
52  
53  
54  
55  
56  
57  
58  
59  
60

241 **Table 2** Comparison of number of people, South Korea, 2012 and 2040

|                  | <i>Population at baseline (2012)</i> |                        |               |                        |               |                        | <i>Projected population (2040)</i> |                        |               |                        |               |                        |
|------------------|--------------------------------------|------------------------|---------------|------------------------|---------------|------------------------|------------------------------------|------------------------|---------------|------------------------|---------------|------------------------|
|                  | <b>Men</b>                           |                        | <b>Women</b>  |                        | <b>Total</b>  |                        | <b>Men</b>                         |                        | <b>Women</b>  |                        | <b>Total</b>  |                        |
|                  | <b>Number</b>                        | <b>Perce<br/>ntage</b> | <b>Number</b> | <b>Perce<br/>ntage</b> | <b>Number</b> | <b>Perce<br/>ntage</b> | <b>Number</b>                      | <b>Perce<br/>ntage</b> | <b>Number</b> | <b>Perce<br/>ntage</b> | <b>Number</b> | <b>Perce<br/>ntage</b> |
| Number of people | 19,709,628                           |                        | 20,133,102    |                        | 39,842,730    |                        | 21,717,128                         |                        | 22,101,680    |                        | 43,818,808    |                        |
| Age (mean±s.d.)  | 44.57±15.60                          |                        | 46.77±16.92   |                        | 45.69±16.31   |                        | 55.54±18.60                        |                        | 57.63±19.33   |                        | 56.59±19.00   |                        |
| 19-39            | 7,985,737                            | 40.52%                 | 7,505,824     | 37.29%                 | 15,491,561    | 38.88%                 | 4,873,740                          | 22.45%                 | 4,588,867     | 20.76%                 | 9,462,607     | 21.60%                 |
| 40-64            | 9,360,489                            | 47.49%                 | 9,230,871     | 45.85%                 | 18,591,360    | 46.66%                 | 8,896,886                          | 40.97%                 | 8,349,634     | 37.78%                 | 17,246,520    | 39.35%                 |
| 65 and above     | 2,363,402                            | 11.98%                 | 3,396,407     | 16.87%                 | 5,759,809     | 14.45%                 | 7,946,502                          | 36.59%                 | 9,163,179     | 41.45%                 | 17,109,681    | 39.05%                 |

|                   |          |       |          |       |           |       |  |  |  |  |  |  |
|-------------------|----------|-------|----------|-------|-----------|-------|--|--|--|--|--|--|
| Smoker            | 8,879,03 | 45.05 | 450,946  | 2.24% | 9,329,983 | 23.42 |  |  |  |  |  |  |
|                   | 7        | %     |          |       |           | %     |  |  |  |  |  |  |
| Physical activity | 5,199,27 | 26.38 | 3,103,03 | 15.41 | 8,302,309 | 20.84 |  |  |  |  |  |  |
|                   | 3        | %     | 6        | %     |           | %     |  |  |  |  |  |  |

242

243

For peer review only

1  
2  
3  
4  
5  
6  
7  
8  
9  
10  
11  
12  
13  
14  
15  
16  
17  
18  
19  
20  
21  
22  
23  
24  
25  
26  
27  
28  
29  
30  
31  
32  
33  
34  
35  
36  
37  
38  
39  
40  
41  
42  
43  
44  
45  
46

1  
2  
3 244 The model was well calibrated in both the initial population and from 2017 to 2040.  
4  
5 245 Differences in each of the variables estimated between 2013 and 2016, which were derived  
6  
7 246 from the Korea Health Panel data, were within the 5% range only when using the predictive  
8  
9 247 model. Additionally, when compared to the population structure for 2040 (the final year) as  
10  
11 248 predicted by Statistics Korea, the total population, gender, and age-specific ratio were similar.  
12  
13

14 249 Figure 2 shows the median predicted BMIs between 2017 and 2040. Each median  
15  
16 250 BMI value from 2013 to 2016 was estimated from the Korea Health Panel survey. The  
17  
18 251 median BMI for the entire adult population is predicted to increase very slightly from 23.23  
19  
20 252 kg/m<sup>2</sup> in 2018 to 23.53 kg/m<sup>2</sup> in 2036 and is expected to remain steady thereafter. The  
21  
22 253 predicted median BMI trends are similar for men; the median BMI in adult men was  
23  
24 254 projected to increase only slightly, from 23.74 kg/m<sup>2</sup> in 2018 to 23.95 kg/m<sup>2</sup> in 2036 and then  
25  
26 255 almost plateau thereafter. However, women were expected to experience a relatively steep  
27  
28 256 rise compared to that of men; the median BMI in adult women was projected to increase from  
29  
30 257 22.66 kg/m<sup>2</sup> in 2018 to 23.17 kg/m<sup>2</sup> in 2040.  
31  
32  
33  
34  
35  
36

37 259 The BMI distributions for men and women from 2012 to 2040 are shown in Figure 3.  
38  
39 260 There was no significant difference between the median BMIs in 2012 and 2040, but the  
40  
41 261 results according to the BMI classifications showed large changes. The proportions of ‘pre-  
42  
43 262 obese’ individuals in both sexes are predicted to increase dramatically over time, while the  
44  
45 263 proportions of individuals who are classified as ‘normal’ and ‘obese’ will gradually decrease.  
46  
47 264 As of 2025, 52.35% of all male adults were expected to be pre-obese, with that proportion  
48  
49 265 expected to be close to 81.23% by 2040. Moreover, 53.24% of all women were expected to  
50  
51 266 be ‘pre-obese’ by 2035, with the proportion rising to almost 59.07% by 2040.  
52  
53  
54  
55  
56  
57

58 268 According to the BMI classification by age group, in South Korea, in 2012, about  
59  
60



269 20.36% of the population aged 19-39 were 'pre-obese', but in 2040, it increased to 39.59%,  
 270 almost double. The proportion of the 'normal' population was almost the same in 2012 and  
 271 2040, and the 'obese class I' decreased by nearly half. However, in the population aged 40  
 272 to 64 and over 65, the proportion of 'pre-obese' increased almost three times in 2040  
 273 compared to that in 2012, and the proportion of 'normal' decreased to less than 20% (Table  
 274 3).

275

276 **Table 3** Comparison of number of people, by BMI classification, South Korea, 2012 and 2040

|                                              | <i>Population at baseline (2012)</i> |              |            | <i>Projected population (2040)</i> |              |            |
|----------------------------------------------|--------------------------------------|--------------|------------|------------------------------------|--------------|------------|
|                                              | <b>19-39</b>                         | <b>40-64</b> | <b>65-</b> | <b>19-39</b>                       | <b>40-64</b> | <b>65-</b> |
| Number of people                             | 15,491,561                           | 18,591,360   | 5,759,809  | 9,462,607                          | 17,246,520   | 17,109,681 |
| BMI (median)%                                | 22.37                                | 23.52        | 23.02      | 23.07                              | 23.64        | 23.58      |
| Distribution of people by BMI classification |                                      |              |            |                                    |              |            |
| Underweight %                                | 11.76                                | 5.10         | 7.60       | 2.66                               | 0.00         | 0.00       |
| Normal %                                     | 45.66                                | 37.81        | 42.12      | 45.68                              | 19.89        | 18.40      |
| Pre-obese %                                  | 20.36                                | 26.51        | 24.10      | 39.59                              | 76.60        | 80.31      |
| Obese class I %                              | 20.67                                | 28.40        | 24.85      | 11.70                              | 3.51         | 1.29       |
| Obese class II %                             | 1.51                                 | 1.79         | 1.30       | 0.36                               | 0.00         | 0.00       |
| Obese class III %                            | 0.03                                 | 0.38         | 0.02       | 0.02                               | 0.00         | 0.00       |

## 277 **DISCUSSION**

278           The purpose of this study was to predict the prevalence of obesity in South Korea in  
279 the year 2040 using a microsimulation model. In this study, we strove to predict future adult  
280 obesity rates in South Korea using the POHEM-BMI, which was developed by Statistics  
281 Canada. Summarizing the predicted results, the median BMI of South Korea's adult  
282 population aged 19 years and older was expected to be 23.55 in 2040, while the percentage of  
283 'pre-obese' individuals was expected to increase over time. While it is encouraging that the  
284 proportion of 'obese' people (i.e., those with BMIs  $\geq 25$  kg/m<sup>2</sup>) in 2040 is predicted to be  
285 much lower than that in 2012, it is discouraging that the proportion of 'normal' individuals is  
286 also markedly lower. Most notably, the pre-obesity rate is predicted to rise dramatically. In  
287 addition to the sex and age variables, our model includes only smoking and physical activity  
288 as health-related behaviors. The distributions of these factors were assumed to remain equal  
289 across the years; hence, our data show that maintaining smoking and physical activity rates at  
290 2012 levels among adults will lead to a sharp increase in the 'pre-obese' population by 2040.

291           To the best of our knowledge, the only other study that predicted future obesity rates  
292 among South Korean adults was the investigation by Baik.[2] That study explored factors  
293 affecting adult as well as abdominal obesity, and constructed forecasting models to predict  
294 obesity prevalence rates in 2020 and 2030 using the Korea National Health and Nutritional  
295 Examination Survey (KNHANES). The prevalence rates of obesity among men and women  
296 in that study were predicted to be 47% and 32%, respectively, in 2020 and 62% and 37%,  
297 respectively, in 2030; these data were inconsistent with our results. The differences in  
298 prediction results appeared to be caused by the different secondary sources and prediction  
299 models in the two studies. First, in Baik's study, a prediction model was constructed by  
300 applying a linear regression model and an autoregressive integrated moving average model  
301 using the KNHANES data. The dependent variable in the prediction model was BMI, and the

1  
2  
3 302 independent variables included the survey year, age, marital status, job status, income status,  
4  
5 303 smoking, alcohol consumption, sleep duration, psychological factors, dietary intake, and  
6  
7 304 fertility rate. In contrast, in this study, the Korea Health Panel data was used as the data  
8  
9 305 source, and BMI was predicted by performing microsimulation with sex, age, smoking,  
10  
11 306 physical activity, and previous years' BMIs as independent variables. Therefore, the method  
12  
13 307 of measurement of the dependent variable, BMI differs between the studies; unlike the  
14  
15 308 KNHANES, which contains body-measured height and weight information, the Korea Health  
16  
17 309 Panel (although this is a representative data source) generates data based on self-reported by  
18  
19 310 respondents, which may underestimate obesity. Inevitably, the obesity rate in the initial  
20  
21 311 population according to the KNHANES tended to be higher; as such, a higher initial  
22  
23 312 prevalence rate would lead to a higher projection.[34]

24  
25  
26  
27  
28 313 We also tried to compare the results from this study with the predicted estimate by  
29  
30 314 country, but few studies have empirically predicted the prevalence of obesity in the future  
31  
32 315 using simulation models. One study compiled nationally-representative data from various  
33  
34 316 sources and predicted the future prevalence of overweight and obesity in Indian adults aged  
35  
36 317 20-69 years will reach 30.5% and 9.5% among men, 27.4% and 13.9% among women,  
37  
38 318 respectively, by 2040.[35] According to a study that estimated the prevalence of obesity in  
39  
40 319 the future through regression modeling, 42% of Americans were expected to be obese by  
41  
42 320 2030.[36] Similarly, a study that predicted the prevalence of obesity in Australian adults by  
43  
44 321 2025 using a multiple linear regression model predicted that 83% of male adults over the age  
45  
46 322 of 20 and 75% of female adults would be overweight or obese.[37] In all three countries,  
47  
48 323 India, the United States, and Australia, overweight and obesity were defined according to the  
49  
50 324 classifications defined by the WHO, and much higher values were found than those in Korea.  
51  
52 325 We also compared our results to those predicted in Canada using the same model, and 59% of  
53  
54 326 the adult Canadian population was predicted to be 'overweight or obese' by 2030.  
55  
56  
57  
58  
59  
60

1  
2  
3 327 This study defined obesity by applying the BMI classification system according to  
4  
5 328 2018 Korean Society for the Study of Obesity guideline for the management of obesity in  
6  
7  
8 329 Korea. It would be appropriate to use international standards for comparison; however, it is  
9  
10 330 necessary to reflect the situation of individual countries in the management of obesity for the  
11  
12 331 purpose of preventing and managing chronic diseases. Therefore, rather than emphasizing the  
13  
14 332 BMI classification criteria, more research is needed to determine the BMI values that can  
15  
16 333 significantly predict the occurrence of chronic diseases. In other words, it is necessary to  
17  
18 334 continuously accumulate sufficient epidemiologic evidence for the relationship between the  
19  
20 335 BMI and the actual risk of disease and death for Koreans, and based on such evidence, efforts  
21  
22 336 to establish appropriate diagnostic and medical standards for Koreans are needed. In  
23  
24 337 particular, the relationship is likely to vary by age and sex; hence, it should be considered too.  
25  
26 338 Here, the obesity standard has been applied collectively regardless of sex and age. However,  
27  
28 339 in order to deviate from a uniform approach to obesity, gender- and age-based approaches are  
29  
30 340 needed, considering the changes in hormones and body composition.

31  
32  
33 341 Because health management policies including obesity management require a large  
34  
35 342 budget, it is most important to establish cost-effective policies. The results from this study  
36  
37 343 made it possible to determine the obese high-risk group by sex and age group, and estimate  
38  
39 344 medical needs. As it is necessary to apply obesity standards differently according to sex and  
40  
41 345 age group, it is difficult to set the 'National Health Promotion Comprehensive Plan' goals.  
42  
43 346 This plan needs to suggest additional, wider-ranging goals considering the characteristics of  
44  
45 347 each sex and age group, rather than presenting goals for obesity prevalence among adult men  
46  
47 348 and women. In this case, the goal should be presented at an achievable level in consideration  
48  
49 349 of future prediction patterns. Finally, systematic public health interventions, which are  
50  
51 350 tailored to individual characteristics need to be established.

52  
53  
54 351 Findings from this study should be interpreted with consideration of several  
55  
56  
57  
58  
59  
60

1  
2  
3 352 limitations. First, since a microsimulation model for predicting obesity prevalence has not  
4  
5 353 been developed in this country, we borrowed the model developed by Statistics Canada, and  
6  
7 354 it may not fit the domestic situation; nonetheless, we defined each variable in the predictive  
8  
9 355 equation according to the operational definition in Korea Health Statistics. However, if the  
10  
11 356 model is more suited to the domestic situation, besides sex, age, smoking, physical activity,  
12  
13 357 and previous year's BMI value, various factors related to BMI may be added to the predictors  
14  
15 358 of BMI. However, in this study, as we faithfully followed the existing model and explored the  
16  
17 359 possibility of domestic application, the process of constructing a prediction equation was  
18  
19 360 omitted. In the future, research to develop a new model of microsimulation in the field of  
20  
21 361 healthcare for domestic conditions will be very valuable. In this process, it is necessary to  
22  
23 362 consider practical suitability and efficiency in selecting basic data, module-specific  
24  
25 363 behavioral equations, and variables for use in the model. Second, we had limited data  
26  
27 364 sources. There is a difference between the current prevalence of obesity calculated from the  
28  
29 365 Korea Health Panel data used in this study and the Korea Health Statistics using the  
30  
31 366 KNHANES. As of 2011, the prevalence of adult obesity in Korea Health Statistics was  
32  
33 367 31.9%, and the prevalence of adult obesity calculated by the Korea Health Panel data was  
34  
35 368 23.7%, a difference of 8.2%.[38] As mentioned earlier in the difference between the results of  
36  
37 369 Baik's study, this difference originated from the method of measuring BMI in the two data  
38  
39 370 sources. However, in the POHEM-BMI model used in this study, the BMI of the previous  
40  
41 371 year was regarded as the main explanatory variable, and therefore, the Korea Health panel  
42  
43 372 data that followed the same participants once a year was inevitably used. In addition, the  
44  
45 373 original POHEM-BMI model includes the process of converting self-reported BMI into a  
46  
47 374 measured BMI, but we omitted this due to limitations of the data source. Third, we assumed  
48  
49 375 that the attributes of 19-year-old individuals entered each year remain at a similar level each  
50  
51 376 year. This means that the individual attributes of 19-year-old adults are the same for 29 years  
52  
53  
54  
55  
56  
57  
58  
59  
60

1  
2  
3 377 from 2012 to 2040; thus, it can be considered somewhat less realistic. In future studies, it is  
4  
5 378 expected that more meaningful and realistic results will be derived if the model is constructed  
6  
7 379 by reflecting the trend of changes in the attributes of the 19-year-old population and updating  
8  
9 380 it according to the year.

11  
12 381 Nevertheless, our study is the first to examine the possibility of using  
13  
14 382 microsimulation to predict future BMI medians in South Korea. Additionally, the BMI of the  
15  
16 383 future adult population was predicted after considering the change in population structure at  
17  
18 384 the macro level as well as individual health behavior components at the micro level.

19  
20  
21 385

## 22 386 **CONCLUSION**

23  
24  
25 387 The key finding of this study is that by 2040, 70.05% of Korean adults are predicted  
26  
27 388 to be pre-obese. Utilizing data sources available in Korea, the possibility of applying and  
28  
29 389 expanding on the concept of microsimulation was explored. In future studies, a model  
30  
31 390 suitable for South Korea needs to be developed, and the effectiveness of specific health  
32  
33 391 policies ought to be assessed by applying various relevant scenarios to the basic forecasting  
34  
35 392 model.

36  
37  
38 393

## 39 394 **Abbreviations**

40  
41  
42 395 BMI: body mass index; KNHANES: Korea National Health and Nutritional  
43  
44 396 Examination Survey, POHEM: Population Health Model

## 45 397 **Authors' Contributions**

46  
47 398 YS (the first author) designed the study, analyzed, and interpreted the data, and wrote  
48  
49 399 the paper. YE participated in the statistical analysis. DS aided in the interpretation of the data  
50  
51 400 and preparation of the manuscript. SJ (the corresponding author) directed this study. All  
52  
53 401 authors read and approved the final version of the manuscript.

**402 Funding**

403 This work was supported by the National Research Foundation of Korea (NRF) grant  
404 funded by the Korea government (Ministry of Science and ICT) (No. 2017R1A2B4005876).

405 The funding agency had no role in the study design, analysis and interpretation of the data, or  
406 the preparation of the manuscript.

**407 Competing Interests**

408 The authors declare that they have no competing interests.

**409 Ethics approval**

410 This study used publicly available data of Korea Health Panel Survey 2011-2012  
411 from the Korea Institute for Health and Social Affairs and the National Health Insurance,  
412 population statistics based on resident registration, population projections, complete life  
413 tables and future mortality rates from Statistics Korea. The dataset does not contain any  
414 identifiable personal information. Ethical approval was given by the Institutional Review  
415 Board of Korea University, Seoul, Korea (IRB No. KUIRB-2020-0018-01).

**416 Data sharing statement**

417 The Korea Health Panel Survey data used in this article is available in  
418 <https://www.khp.re.kr:444/eng/data/data.do>. Detailed information on the survey design and  
419 data characteristics are provided at <https://www.khp.re.kr:444/eng/survey/sampling.do>.  
420 Population statistics, population projections, and complete life tables are available from  
421 <http://kosis.kr/eng/>.

422

423

424 **REFERENCES**

425

426 1. Ng M, Fleming T, Robinson M, et al. Global, regional, and national prevalence of

427 overweight and obesity in children and adults during 1980-2013: a systematic analysis for

428 the Global Burden of Disease Study 2013. *Lancet* 2014;384:766–81.429 [https://doi.org/10.1016/S0140-6736\(14\)60460-8](https://doi.org/10.1016/S0140-6736(14)60460-8)

430 2. Baik I. Forecasting obesity prevalence in Korean adults for the years 2020 and 2030 by the

431 analysis of contributing factors. *Nutr Res Pract* 2018;12:25–7.432 <https://dx.doi.org/10.4162/nrp.2018.12.3.251>433 3. Kim D, Ahn C, Nam SY. Prevalence of obesity in Korea. *Obesity Rev* 2005;6:117–21.434 <https://doi.org/10.1111/j.1467-789X.2005.00173.x>

435 4. Okosun IS, Chandra KMD, Choi S, et al. Hypertension and type 2 diabetes comorbidity in

436 adults in the United States: Risk of overall and regional adiposity. *Obes Res* 2001;9:1–9.437 <https://doi.org/10.1038/oby.2001.1>

438 5. Krauss RM, Winston M, Fletcher BJ, et al. Obesity: impact on cardiovascular disease.

439 *Circulation* 1998;98:1472–6.440 6. Chin K, Ohi M. Obesity and obstructive sleep apnea syndrome. *Intern Med* 1999;38:200–441 2. <https://doi.org/10.2169/internalmedicine.38.200>

442 7. Wallström P, Bjartell A, Gullberg B, et al. A prospective Swedish study on body size, body

443 composition, diabetes, and prostate cancer risk. *Brit J Cancer* 2009;100:1799–805.444 <https://doi.org/10.1038/sj.bjc.6605077>

445 8. Guh DP, Zhang W, Bansback N, et al. The incidence of comorbidities related to obesity

446 and overweight: a systematic review and meta-analysis. *BMC Public Health* 2009;9:88.447 <https://doi.org/10.1186/1471-2458-9-88>448 9. Coggon D, Reading I, Croft P, et al. Knee osteoarthritis and obesity. *Int J Obes Relat*



- 1  
2  
3 449 *Metab Disord* 2001;25:622–7. <https://doi.org/10.1038/sj.ijo.0801585>
- 4  
5 450 10. Stenholm S, Rantanen T, Alanen E, et al. Obesity history as a predictor of walking  
6  
7 451 limitation at old age. *Obesity* 2007;15:929–38. <https://doi.org/10.1038/oby.2007.583>
- 8  
9 452 11. Alley DE, Chang VW. The changing relationship of obesity and disability, 1988–2004.  
10  
11 453 *JAMA* 2007;298:2020–7. <https://doi.org/10.1001/jama.298.17.2020>
- 12  
13 454 12. Larsson U, Karlsson J, Sullivan M. Impact of overweight and obesity on health-related  
14  
15 455 quality of life—a Swedish population study. *Int J Obes Relat Metab Disord* 2002;26:417–24.  
16  
17 456 <https://doi.org/10.1038/sj.ijo.0801919>
- 18  
19 457 13. Zaninotto P, Pierce M, Breeze E, et al. BMI and waist circumference as predictors of  
20  
21 458 well-being in older adults: findings from the English Longitudinal Study of Ageing. *Obesity*  
22  
23 459 2010;18:1981–7. <https://doi.org/10.1038/oby.2009.497>
- 24  
25 460 14. Emerging Risk Factors Collaboration, Wormser D, Kaptoge S, et al. Separate and  
26  
27 461 combined associations of body-mass index and abdominal adiposity with cardiovascular  
28  
29 462 disease: Collaborative analysis of 58 prospective studies. *Lancet* 2011;377:1085–95.  
30  
31 463 [https://doi.org/10.1016/S0140-6736\(11\)60105-0](https://doi.org/10.1016/S0140-6736(11)60105-0)
- 32  
33 464 15. The Global Burden of Metabolic Risk Factors for Chronic Diseases Collaboration (BMI  
34  
35 465 Mediated Effects), Lu Y, Hajifathalian K, et al. Metabolic mediators of the effects of body-  
36  
37 466 mass index, overweight, and obesity on coronary heart disease and stroke: A pooled  
38  
39 467 analysis of 97 prospective cohorts with 1.8 million participants. *Lancet* 2014;383:970–83.  
40  
41 468 [https://doi.org/10.1016/S0140-6736\(13\)61836-X](https://doi.org/10.1016/S0140-6736(13)61836-X)
- 42  
43 469 16. Renehan AG, Tyson M, Egger M, et al. Body-mass index and incidence of cancer: A  
44  
45 470 systematic review and meta-analysis of prospective observational studies. *Lancet*  
46  
47 471 2008;371:569–78. [https://doi.org/10.1016/S0140-6736\(08\)60269-X](https://doi.org/10.1016/S0140-6736(08)60269-X)
- 48  
49 472 17. Bhimjiyani A, Knuchel-Takano A, Hunt D, et al. Tipping the scales: Why preventing  
50  
51 473 obesity makes economic sense. Technical Report 2016.  
52  
53  
54  
55  
56  
57  
58  
59  
60

- 1  
2  
3 474 [https://www.cancerresearchuk.org/sites/default/files/tipping\\_the\\_scales\\_-](https://www.cancerresearchuk.org/sites/default/files/tipping_the_scales_-_cruk_full_report11.pdf)  
4  
5 [cruk\\_full\\_report11.pdf](https://www.cancerresearchuk.org/sites/default/files/tipping_the_scales_-_cruk_full_report11.pdf) (accessed 26 Jan 2020).  
6  
7  
8 476 18. Wang YC, McPherson K, Marsh T, et al. Health and economic burden of the projected  
9  
10 477 obesity trends in the USA and the UK. *Lancet* 2011;378:815–25.  
11  
12 478 [https://doi.org/10.1016/S0140-6736\(11\)60814-3](https://doi.org/10.1016/S0140-6736(11)60814-3)  
13  
14  
15 479 19. Lee M. Half of the socioeconomic costs of obesity are ‘medical costs’. Korea Biomedical  
16  
17 480 Review (2018, December 10).  
18  
19 481 <http://www.docdocdoc.co.kr/news/articleView.html?idxno=1063317/> (accessed 2020,  
20  
21 482 [January 29](http://www.docdocdoc.co.kr/news/articleView.html?idxno=1063317/))  
22  
23  
24 483 20. Low S, Chin MC, Ma S, et al. Rationale for redefining obesity in Asians. *Ann Acad Med*  
25  
26 484 *Singapore* 2009;38:66–9.  
27  
28  
29 485 21. The World Health Organization Western Pacific Region, International Association for the  
30  
31 486 Study of Obesity. The Asia-Pacific Perspective: Redefining obesity and its treatment.  
32  
33 487 Sydney, Australia: Health Communications Australia Pty Limited; 2000.  
34  
35  
36 488 22. Seo MH, Kim YH, Han K, et al. Prevalence of obesity and incidence of obesity-related  
37  
38 489 comorbidities in Koreans based on National Health Insurance Service Health Checkup Data  
39  
40 490 2006-2015 (*J Obes Metab Syndr* 2018;27:46–52). *J Obes Metab Syndr* 2018;27:198–9.  
41  
42 491 <https://doi.org/10.7570/jomes.2018.27.3.198>  
43  
44  
45 492 23. Seo MH, Lee WY, Kim SS, et al. 2018 Korean Society for the Study of Obesity guideline  
46  
47 493 for the management of obesity in Korea. *J Obes Metab Syndr* 2019;28:40–5.  
48  
49 494 <https://doi.org/10.7570/jomes.2019.28.1.40>  
50  
51  
52 495 24. Kim D. Estimation of disease and disease burden by health behavior. Sejong City: Korea  
53  
54 496 Institute for Health and Social Affairs 2018.  
55  
56 497 25. Çağlayan Ç, Terawaki H, Chen Q, et al. Microsimulation Modeling in Oncology. *JCO*  
57  
58 498 *Clin Cancer Inform* 2018;2:1–11. <https://doi.org/10.1200/CCI.17.00029>  
59  
60

- 1  
2  
3 499 26. Hennessy D, Garner R, Flanagan WM, et al. Development of a population-based  
4  
5 500 microsimulation model of body mass index. *Health Rep* 2017;28:20–30.  
6  
7  
8 501 27. Spielauer M. Dynamic microsimulation of health care demand, health care finance and  
9  
10 502 the economic impact of health behaviours: survey and review. 2007 *International Journal*  
11  
12 503 *of Microsimulation* 2007;1:35–53.  
13  
14 504 28. The National Academies of Sciences, Engineering, and Medicine. Assessing prevalence  
15  
16 505 and trends in obesity: Navigating the evidence. Washington DC: The National Academies  
17  
18 506 Press 2016.  
19  
20  
21 507 29. Soyiri IN, Reidpath DD. An overview of health forecasting. *Environ Health Prev Med*  
22  
23 508 2013;18:1–9. <https://doi.org/10.1007/s12199-012-0294-6>  
24  
25  
26 509 30. Pineda E, Sanchez-Romero LM, Brown M, et al. Forecasting future trends in obesity  
27  
28 510 across Europe: The value of improving surveillance. *Obes Facts* 2018;11:360–71.  
29  
30 511 <https://doi.org/10.1159/000492115>  
31  
32  
33 512 31. Zucchelli E, Jones A, Rice N. The evaluation of health policies through dynamic  
34  
35 513 microsimulation methods. *International Journal of Microsimulation* 2012;5:2–20.  
36  
37  
38 514 32. Hennessy DA, Flanagan WM, Tanuseputro P, et al. The Population Health Model  
39  
40 515 (POHEM): an overview of rationale, methods and applications. *Popul Health Metrics*  
41  
42 516 2015;13:24. <https://doi.org/10.1186/s12963-015-0057-x>  
43  
44  
45 517 33. Manuel DG, Tuna M, Hennessy D, et al. Projections of preventable risks for  
46  
47 518 cardiovascular disease in Canada to 2021: a microsimulation modelling approach. *CMAJ*  
48  
49 519 *Open* 2014;2:E94–101. <https://doi.org/10.9778/cmajo.2012-0015>  
50  
51  
52 520 34. Lin J, Thompson TJ, Cheng YJ, et al. Projection of the future diabetes burden in the  
53  
54 521 United States through 2060. *Popul Health Metr* 2018;16:9. [https://doi.org/10.1186/s12963-](https://doi.org/10.1186/s12963-018-0166-4)  
55  
56 522 [018-0166-4](https://doi.org/10.1186/s12963-018-0166-4)  
57  
58  
59 523 35. Luhar S, Timæus IM, Jones R, et al. Forecasting the prevalence of overweight and obesity  
60

- 1  
2  
3 524 in India to 2040. *PloS One* 2020;15:e0229438.  
4  
5 525 36. Finkelstein EA, Khavjou OA, Thompson H, et al. Obesity and severe obesity forecasts  
6  
7 526 through 2030. *Am J Prev Med* 2012;42:563–70.  
8  
9  
10 527 37. Haby MM, Markwick A, Peeters A, et al. Future predictions of body mass index and  
11  
12 528 overweight prevalence in Australia, 2005–2025. *Health Promot Int* 2012;27:250–60.  
13  
14 529 38. Choi JS, Choi SE, Yeom AR, et al. A Report on the Korea Health Panel Survey of 2011.  
15  
16  
17 530 Korea Institute for Health and Affairs. 2013.  
18  
19 531  
20  
21 532  
22  
23  
24  
25  
26  
27  
28  
29  
30  
31  
32  
33  
34  
35  
36  
37  
38  
39  
40  
41  
42  
43  
44  
45  
46  
47  
48  
49  
50  
51  
52  
53  
54  
55  
56  
57  
58  
59  
60

1  
2  
3 533 **Figure legends**  
4

5 534 **Figure 1** Summary of data sources and methods used to generate and validate projections of  
6  
7  
8 535 distribution of BMI categories in South Korea, 2012–2040  
9

10 536 **Figure 2** Population Health Model (POHEM) projections of median BMI in South Korea,  
11  
12 537 2012–2040  
13

14 538 **Figure 3A** Projection of distribution of BMI, adults aged 19 years and older, South Korea,  
15  
16 539 2012–2040  
17

18  
19 540 **Figure 3B** Projection of distribution of BMI, men aged 19 years and older, South Korea,  
20  
21 541 2012–2040  
22

23  
24 542 **Figure 3C** Projection of distribution of BMI, women aged 19 years and older, South Korea,  
25  
26 543 2012–2040  
27

28 544  
29  
30  
31  
32  
33  
34  
35  
36  
37  
38  
39  
40  
41  
42  
43  
44  
45  
46  
47  
48  
49  
50  
51  
52  
53  
54  
55  
56  
57  
58  
59  
60

Figure 1 Summary of data sources and methods used to generate and validate projections of distribution of BMI categories in South Korea, 2012-2040



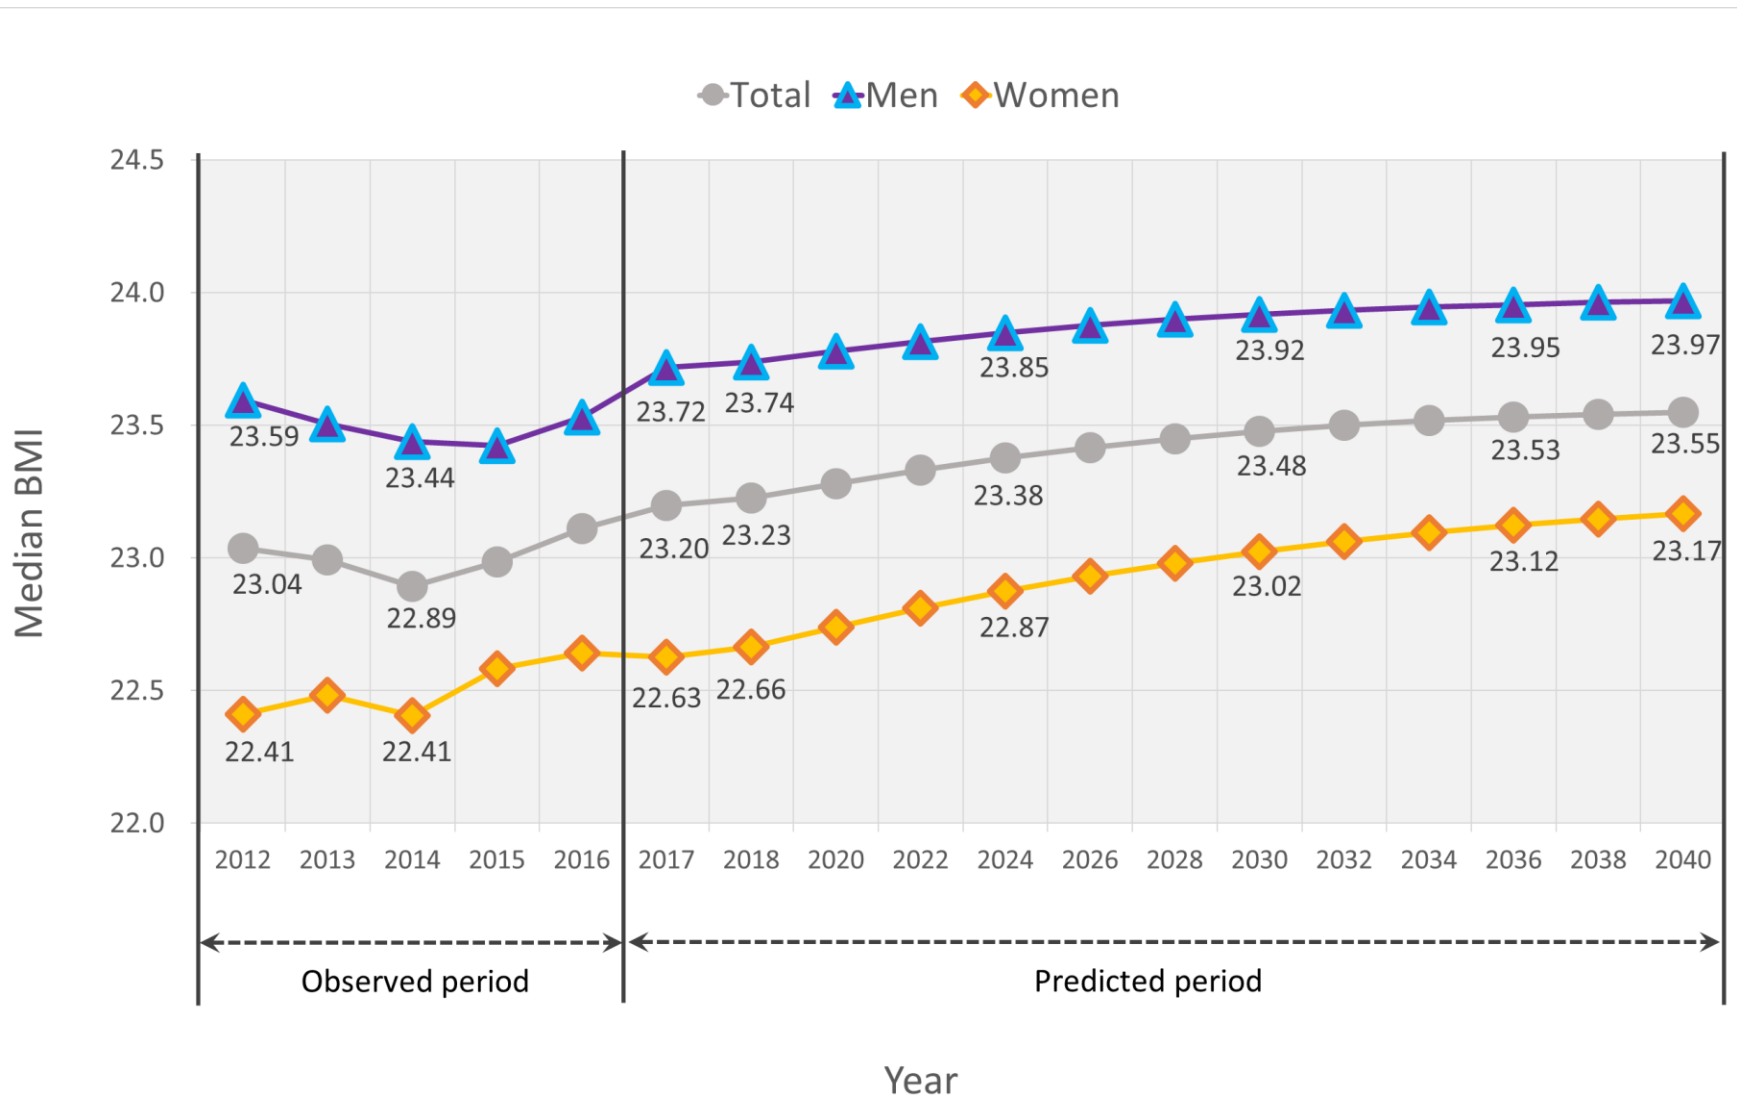

Figure 3 Projection of distribution of BMI, (A) Adults, (B) Men and (C) Women, aged 19 years and older, South Korea, 2012-2040

1  
2  
3  
4  
5  
6  
7  
8  
9  
10  
11  
12  
13  
14  
15  
16  
17  
18  
19  
20  
21  
22  
23  
24  
25  
26  
27  
28  
29  
30  
31  
32  
33  
34  
35  
36  
37  
38  
39  
40  
41

A

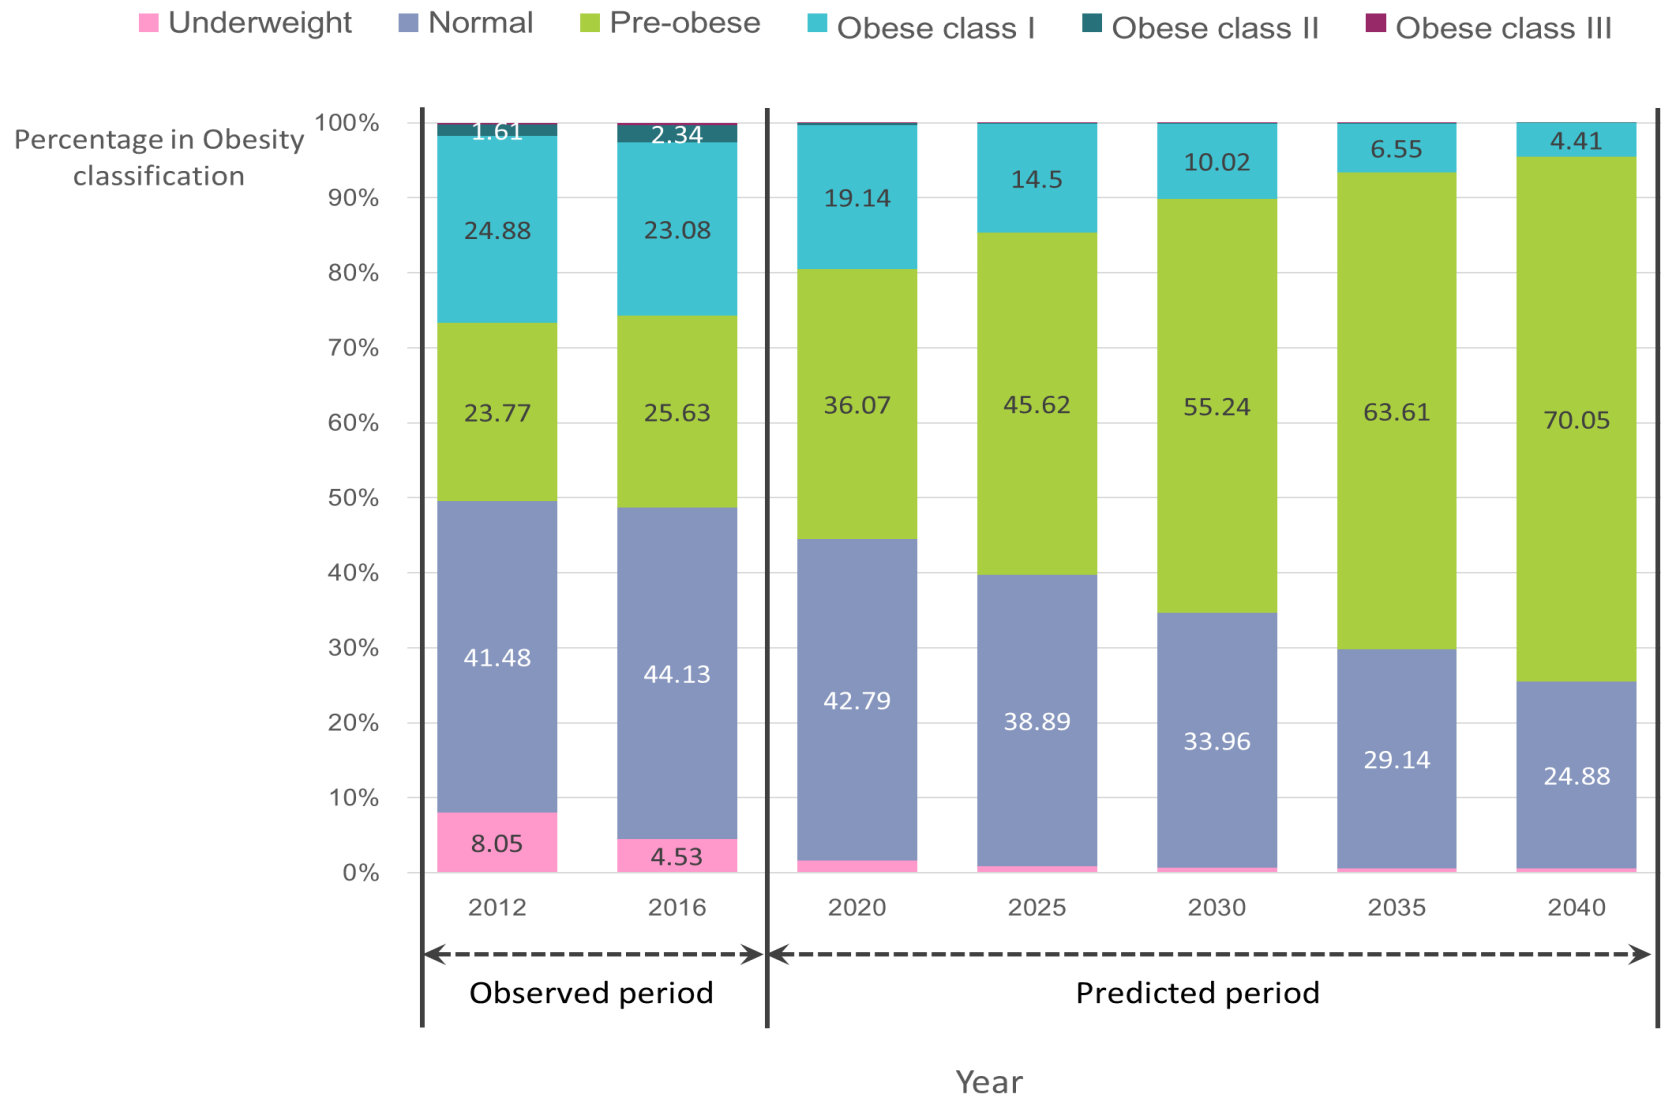



**Figure 3** Projection of distribution of BMI, (A) Adults, (B) Men and (C) Women, aged 19 years and older, South Korea, 2012-2040

**B**

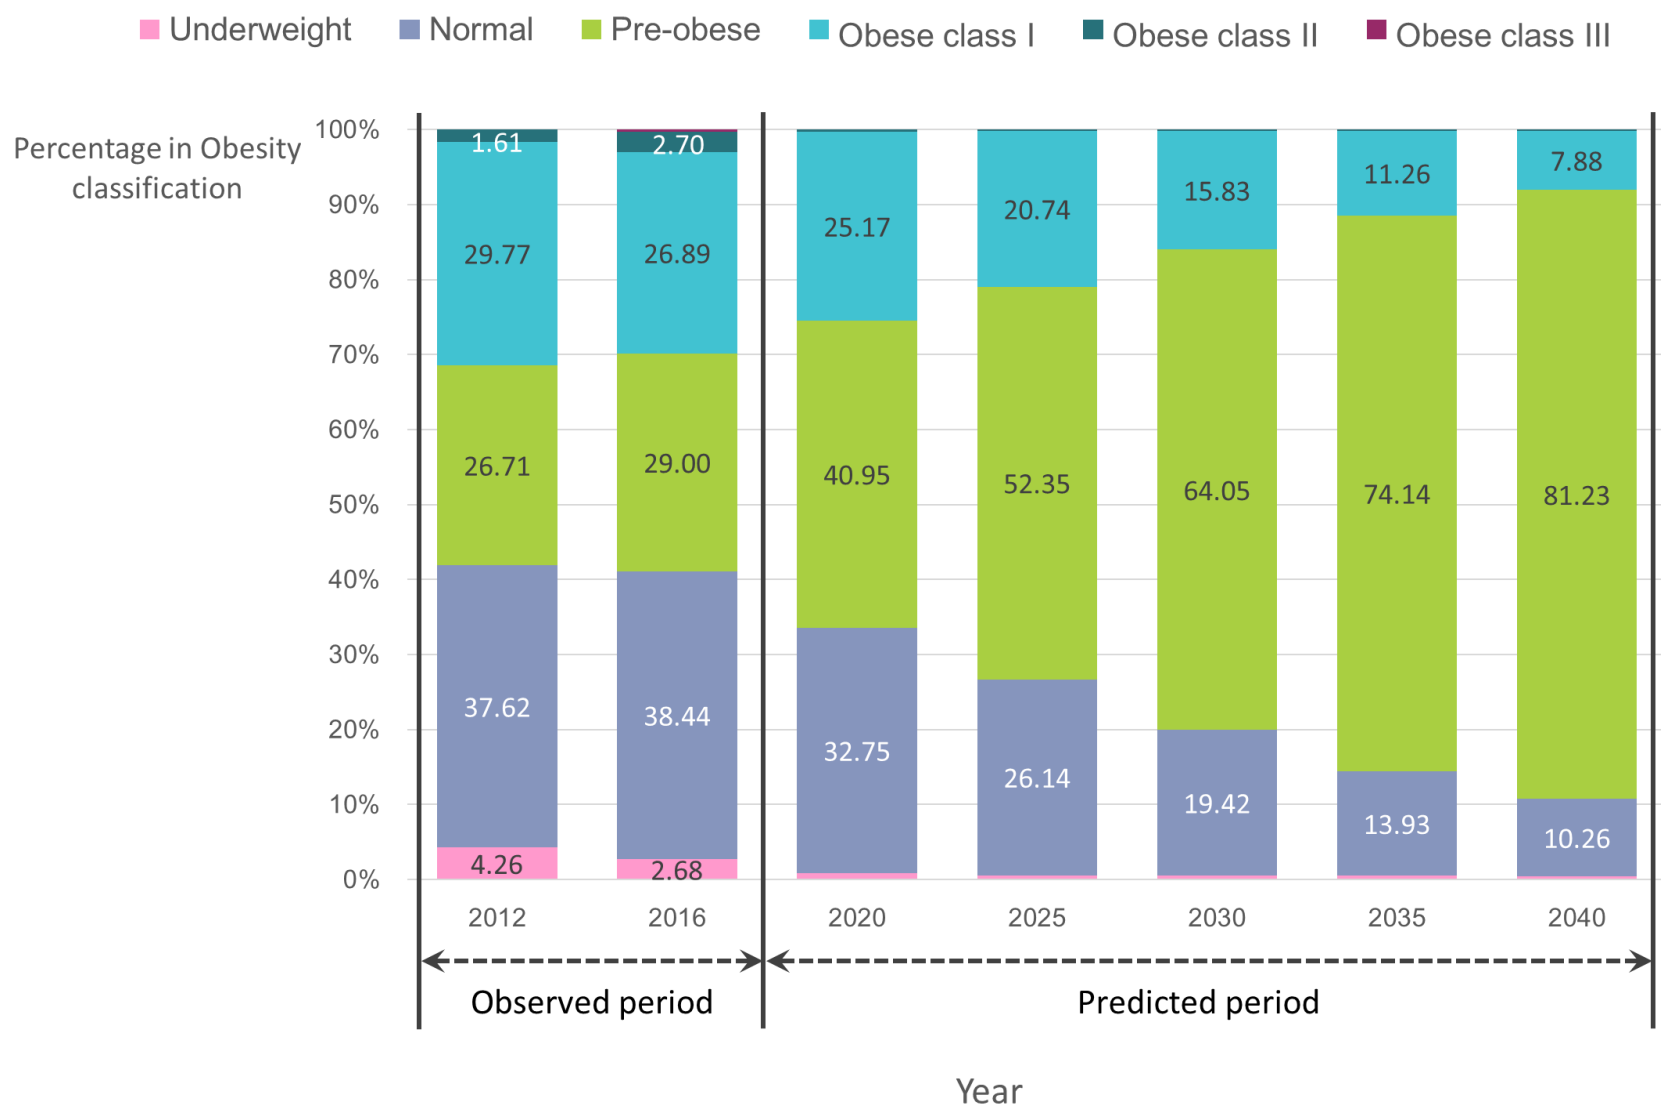

1  
2  
3  
4  
5  
6  
7  
8  
9  
10  
11  
12  
13  
14  
15  
16  
17  
18  
19  
20  
21  
22  
23  
24  
25  
26  
27  
28  
29  
30  
31  
32  
33  
34  
35  
36  
37  
38  
39  
40  
41

Page 663  
**Figure 3** Projection of distribution of BMI, (A) Adults, (B) Men and (C) Women, aged 19 years and older, South Korea, 2012-2040

1  
2  
3  
4  
5  
6  
7  
8  
9  
10  
11  
12  
13  
14  
15  
16  
17  
18  
19  
20  
21  
22  
23  
24  
25  
26  
27  
28  
29  
30  
31  
32  
33  
34  
35  
36  
37  
38  
39  
40  
41

**C**

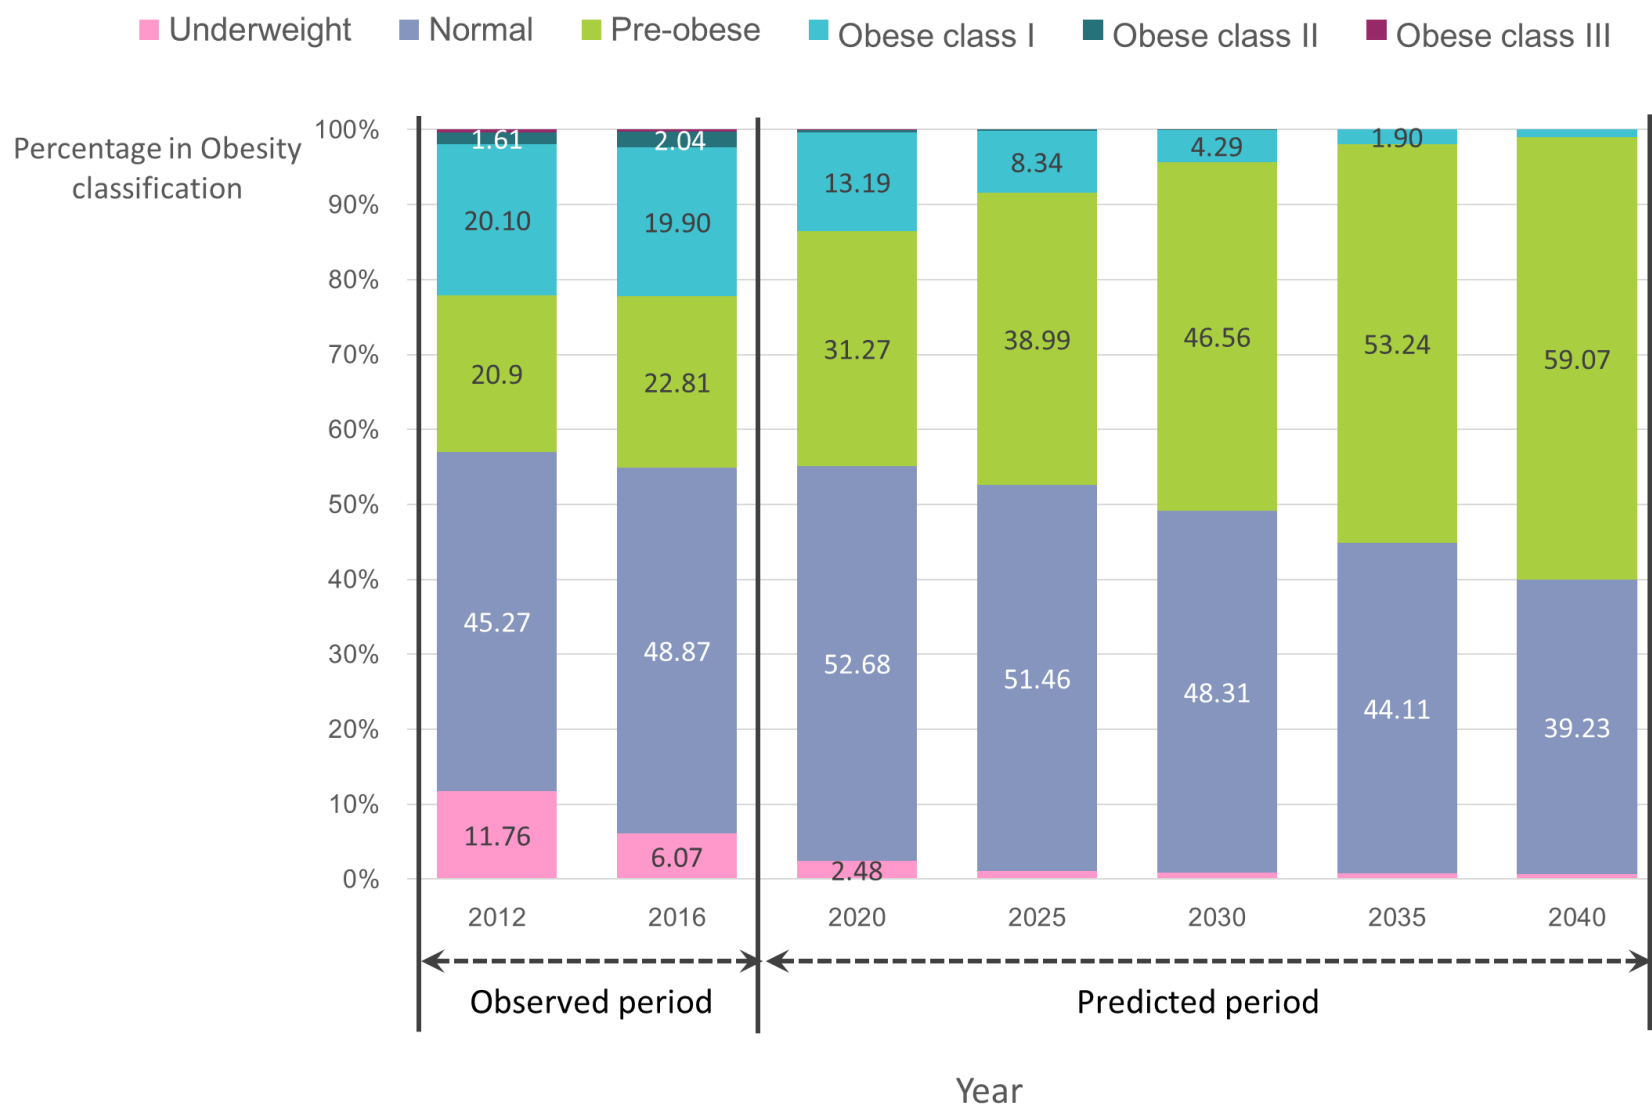

1 **Title: Projecting the prevalence of obesity in South Korea through 2040: a**  
2 **microsimulation modeling approach**

3  
4 **Authors:** Yoon-Sun Jung <sup>a\*</sup>, Young-Eun Kim<sup>b</sup>, Dun-Sol Go<sup>c</sup>, Seok-Jun Yoon<sup>d</sup>

5 **Affiliations:**

6 <sup>a</sup>Department of Public Health, Graduate School, Korea University, Seoul, Korea

7 <sup>b</sup>Big Data Department, National Health Insurance Service, Wonju, Korea

8 <sup>c</sup>Department of Health Care Policy Research, Korea Institute for Health and Social Affairs

9 <sup>d</sup>Department of Preventive Medicine, Korea University College of Medicine, Seoul, Korea

10 **Corresponding author:**

11 Seok-Jun Yoon, M.D., Ph.D.

12 Department of Preventive Medicine, Korea University College of Medicine,

13 73, Goryeodae-ro, Seongbuk-gu, Seoul, 02841, Korea

14 E-mail: yoonsj02@korea.ac.kr

15  
16 **E-mail addresses:**

17 sunnyaaurora@nate.com (Yoon-Sun Jung)

18 kimyes4454@gmail.com (Young-Eun Kim)

19 kds237@gmail.com (Dun-Sol Go)

20  
21 **Keywords:** Microsimulation, body mass index, obesity, Population Health Model, South

22 Korea

23  
24 **Word count:** 4,373

25

**ABSTRACT**

**Objective** To project the prevalence of obesity in 2040 among individuals 19 years and older in South Korea.

**Design, setting, and participants** Using the ‘Population Health Model-Body Mass Index’ (POHEM-BMI) microsimulation model, the prevalence of obesity in Korean adults 19 years and older was projected until 2040. The model integrated individual survey data from the Korea Health Panel Survey of 2011 and 2012, population statistics based on resident registration, population projections, and complete life tables categorized by sex and age. Birth rate, life expectancy, and international migration were based on a medium growth scenario. The base population of Korean adults in 2012, devised through data aggregation, was 39,842,730. The prediction equations were formulated using BMI as the dependent variable; the individual’s sex, age, smoking status, physical activity, and preceding year’s BMI were used as predictive factors.

**Outcome measure** BMI categorized by sex.

**Results** The median BMI for Korean adults in 2040 was forecast to be 23.55 kg/m<sup>2</sup> (23.97 and 23.17 kg/m<sup>2</sup> for men and women, respectively). According to the Korean BMI classification, 70.05% of all adults were forecast to be ‘pre-obese’ (i.e., have BMIs 23 to 24.9) by 2040 (81.23% of men and 59.07% of women) and 24.88% to be ‘normal’.

**Conclusions** We explored the possibility of applying and expanding on the concept of microsimulation in the field of healthcare by combining data sources available in Korea. ~~In future studies, it is necessary to develop a microsimulation model suitable for Korea’s domestic situation, and it is necessary to evaluate the effectiveness of special health policies by applying various prediction scenarios to the basic model. and found that more than half of the adults in this study population will be pre-obese, and the proportions of “obesity” and~~

1  
2  
3 51 “normal” will decrease compared with those in 2012. The results of our study will aid in  
4  
5 52 devising healthy strategies and spreading public awareness for preventing this condition.  
6  
7  
8 53

### 54 **Strengths and limitations of this study**

- 12 55 • To the best of our knowledge, this is the first study to use a microsimulation model to  
13  
14 56 predict future obesity prevalence in Korea considering the change in population structure  
15  
16  
17 57 (macro level) as well as individual health behavior components (micro level).  
18  
19 58 • ~~The results of our study aid has the greatest significance in exploring the possibility of~~  
20  
21 59 ~~applying and expanding the concept of microsimulation in the field of healthcare by~~  
22  
23  
24 60 ~~combining data sources available in Korea.~~ suggesting additional and wider-ranging  
25  
26 61 strategies for obesity prevention by considering sex and age group in the formulation of  
27  
28 62 the ‘National Health Promotion Comprehensive Plan’.  
29  
30  
31 63 • Although a representative data source was used in this study, the prevalence of obesity  
32  
33 64 may be underestimated because it is based on a self-reported BMI value.  
34  
35 65 • ~~The estimated BMI value differs from the Korea Health Statistics, which is based on the~~  
36  
37 66 ~~data measured by actual measurement.~~  
38  
39  
40 67 • ~~There is a limitation that it does not accurately reflect the domestic situation because it~~  
41  
42 68 ~~borrow a micro-simulation model developed abroad.~~ This study uses a micro-simulation  
43  
44 69 model developed abroad, and hence, may not reflect the domestic situations accurately.  
45  
46  
47 70 • Another limitation is that we assumed the attributes of 19-year-old individuals to remain  
48  
49 71 similar each year.  
50  
51 72  
52  
53  
54 73  
55  
56  
57  
58  
59  
60

## 74 BACKGROUND

75 The prevalence of overweight and obesity has increased markedly over the past 3 decades,  
76 and concerns about health risks associated with obesity have become almost universal.[1]

77 The increasing rate of obesity is a growing public health concern not only in Western  
78 countries but also in South Korea.[2] From the 1990s through the beginning of the new  
79 millennium, the prevalence of adult and child obesity has increased rapidly and continues to  
80 rise steadily in parallel with rapid social and economic development.[3]

81 Obesity is not only a major public health problem in itself, but also a factor in the  
82 development of many chronic diseases; hence, it constitutes a strain on individuals and health  
83 systems worldwide. ~~In the Global Burden of Disease Study,[4] globally in 2017, a high body-~~  
84 ~~mass index (BMI) accounted for 4.72 million deaths and 148.0 million disability-adjusted-~~  
85 ~~life-years.~~ It is associated with an increased risk of many disorders, including diabetes,  
86 hypertension, dyslipidemia, heart disease, stroke, sleep apnea, early death, and cancer.[4-8]  
87 Moreover, obesity among older people increases the risk of knee osteoarthritis[9] and reduces  
88 functional capacity and quality of life.[10-13] The prevalence of these conditions rises in  
89 ~~proportion to the increase in obesity[14-17] commensurate with increased obesity and is~~  
90 ~~associated with significant morbidity, higher risks of mortality, and increased economic costs~~  
91 ~~for both individuals and the society at large.[18] A study of data from the National Health~~  
92 ~~Insurance Service in Korea found that the socioeconomic cost of obesity in 2016 was~~  
93 ~~approximately 9,665.32 million US dollars.[19]~~

94 Meanwhile, with respect to worldwide comparisons, whether cutoff points for  
95 overweight and obesity should be lower for Asians than for another ethnic groups remains  
96 debatable.[20] The World Health Organization has proposed BMIs of 18.5–22.9 kg/m<sup>2</sup> as  
97 optimal, 23–24.9 kg/m<sup>2</sup> as overweight, 25–29.9 kg/m<sup>2</sup> as moderate obesity, and  $\geq 30$  kg/m<sup>2</sup>  
98 as severe obesity for Asians.[21] ~~However, it is more important to determine particular BMI-~~

1  
2  
3 99 ~~values that increase the likelihood of developing particular chronic disease, depending on the~~  
4  
5  
6 100 ~~sex and age of the individual.~~ The Korean Society of Obesity, which was established to  
7  
8 101 improve obesity management through research and education, revised its clinical practical  
9  
10 102 guidelines for the prevention and treatment of obesity in 2018. The new guidelines renamed  
11  
12 103 the “overweight” category to "pre-obese", and divided obesity into 3 categories, thereby  
13  
14 104 aiming to highlight the risk of obesity instead of promoting the term "overweight." The most  
15  
16 105 recent guidance is based in part on data of 84,690,131 Korean adults extracted from the  
17  
18 106 Korean National Health Insurance Service Health Checkup Database between 2006 and 2015.  
19  
20 107 By including the entire population registered in the National Health Insurance Service  
21  
22 108 Database, they calculated the first and second cutoff points corresponding to the increased  
23  
24 109 risk of any of the 3 accompanying diseases (type 2 diabetes, hypertension, and dyslipidemia)  
25  
26 110 ~~The first cutoff BMI level was 23 kg/m<sup>2</sup>, and the second cutoff BMI level was The first and~~  
27  
28 111 ~~second BMI cutoff levels were reported to be 23 kg/m<sup>2</sup> and 25 kg/m<sup>2</sup>, respectively,~~  
29  
30  
31 112 suggesting the necessity of obesity criteria that accurately reflect the risk of chronic disease  
32  
33 113 among Koreans.[22,23]

34  
35  
36  
37 114 ~~A study of data from the National Health Insurance Service in Korea found that the~~  
38  
39 115 ~~socioeconomic cost of obesity in 2016 was approximately 9,665.32 million US dollars;~~  
40  
41 116 ~~medical expenses accounted for 51.3% of this amount, followed by decreasing productivity~~  
42  
43 117 ~~(20.5%), productivity loss (13.1%), early mortality (10.0%), care costs (4.3%), and~~  
44  
45 118 ~~transportation costs (0.8%).[24] Several studies on the long-term trends of obesity prevalence~~  
46  
47 119 ~~in South Korea found that obesity is increasing in men but not in women.[25-27]~~ Although  
48  
49 120 numerous investigators in other countries have attempted to predict the future prevalence of  
50  
51 121 obesity, only one such study by Inkyung Baik was recently performed in South Korea.[2]  
52  
53 122 More recent trends still need to be investigated through predictive studies, and the accurate  
54  
55 123 prediction of obesity prevalence remains an important public health-related goal in the  
56  
57  
58  
59  
60

1  
2  
3 124 country. To efficiently establish and execute an effective healthcare policy, which would  
4  
5 125 require a large budget, it is necessary to select future targets for policy interventions (such as  
6  
7 126 high-risk groups) to predict healthcare needs and prevent budget waste.

9  
10 127 Past prediction models incorporated a country's entire population; as such,  
11  
12 128 macroscopic inferences based on average projections for the future society were generalized.  
13  
14 129 However, when establishing a healthcare policy, it is necessary to estimate the future disease  
15  
16 130 burden and medical needs of the entire population based on future projections that reflect  
17  
18 131 individual characteristics because a real-world understanding of factors that are influenced by  
19  
20 132 policies or institutions is required. Individuals are independent entities with different  
21  
22 133 characteristics and needs that govern their future decisions and behaviors. By applying these  
23  
24 134 needs, health-related projections can be modeled to reflect health risk factors such as sex,  
25  
26 135 age, life cycle activities, smoking, etc., and the effects of policy interventions can be  
27  
28 136 quantified.[24] In this regard, we aimed to predict the prevalence of obesity in Korea by  
29  
30 137 using microsimulation, which is optimal for considering individual properties.

31  
32  
33 138 Microsimulation is a modeling technique, which typically uses individual microunits,  
34  
35 139 each with its own set of properties, to simulate downstream events based on the probability of  
36  
37 140 transition between predefined states and their changes over time. When used in medicine,  
38  
39 141 microsimulation can be particularly powerful because it preserves the patterns of previous  
40  
41 142 behaviors and conditions, and allows for a clearer representation and understanding of how  
42  
43 143 various processes affect the total outcome of the population over time.[25]~~In other words,~~  
44  
45 144 ~~microsimulation can predict the burden of disease by modeling various health risk factors that~~  
46  
47 145 ~~occur during an individual's lifetime.~~ Given macro-effects such as changes in population  
48  
49 146 structures in the forecasting model, microsimulation is very useful as it can estimate both  
50  
51 147 disease burdens and medical needs across the country.[24] ~~Collecting individual events from~~  
52  
53 148 ~~within a population that has varying attributes can be used to predict and plan outcomes (such~~  
54  
55  
56  
57  
58  
59  
60



1  
2  
3 149 ~~as incidence, prevalence, and cost), and can also be used to assess the clinical and cost~~  
4  
5 150 ~~effectiveness of alternative health interventions.~~[29] Microsimulation modeling is particularly  
6  
7 151 useful for studying BMI trends because it can simultaneously explain population dynamics  
8  
9 152 such as aging, ~~migration~~, and mortality. Additionally, the longitudinal framework of these  
10  
11 153 models allows for interpreting a person's change in BMI as it is affected by factors such as a  
12  
13 154 person's physical activity and behavior, and thus, acts as a contributing factor for other  
14  
15 155 diseases.[26] However, while microsimulation models have been steadily evolving across  
16  
17 156 health- and economy-related fields in many European countries,[27] they are yet to be  
18  
19 157 actively utilized in South Korea (especially for healthcare).

20  
21  
22  
23  
24 158 Obesity prevalence and trend estimates provide important information for research,  
25  
26 159 policy, and intervention.[28] ~~As mentioned above, it is necessary to estimate the magnitude~~  
27  
28 160 ~~of obesity because it has been identified as a risk factor for various chronic diseases.~~ Because  
29  
30 161 health forecasting predicts disease episodes and portends future events, it facilitates  
31  
32 162 healthcare strategies by promoting the setting of goals to reduce obesity, establish health  
33  
34 163 promotion interventions, and optimize resource allocation.[29] Obesity trends may also be  
35  
36 164 used to urge governments to implement preventative approaches for reducing obesity.[30]  
37  
38 165 Based on the above findings, we performed this study to project the future trends in obesity  
39  
40 166 prevalence in South Korea up to the year 2040.  
41  
42  
43  
44  
45

167

## 168 **METHODS**

### 169 **Model**

50  
51 170 We used the Population Health Model (POHEM)-BMI to estimate the prevalence of  
52  
53 171 obesity among adults 19 years and older in South Korea from 2012 through 2040. In brief,  
54  
55 172 POHEM is a time-continuous, population-based, dynamic microsimulation model with  
56  
57 173 individual underlying units of analysis used worldwide. Dynamic microsimulation, in the  
58  
59  
60

1  
2  
3 174 context of social science and population health, is a simulation of individuals (i.e., micro-  
4  
5 175 level) and their behaviors, statuses, and actions (dynamics) over time.[31] These are modeled  
6  
7  
8 176 as desired using multiple sources of empirical data, including cross-sectional surveys,  
9  
10 177 administrative databases, vital statistics, and census data.[32]  
11  
12 178 Through dynamic simulation, POHEM creates a population and ages it, one person at a time,  
13  
14 179 until death.[33] The model dynamically simulates an individual's disease state, risk factors,  
15  
16 180 and health determinants to describe and plan health outcomes.[32] POHEM is accessible  
17  
18 181 because it wants the general process to be constant across the country's population, with the  
19  
20 182 exception of variables unique to each country, such as marriage and mortality. The POHEM  
21  
22 183 models include cardiovascular disease, various cancers, osteoarthritis, physical activity, and  
23  
24 184 neurological events. The model used in this study was the POHEM-BMI; the performance of  
25  
26 185 each prediction step is shown in Figure 1.  
27  
28  
29

### 30 186 **Base population**

31  
32  
33 187 To create the base population for the POHEM-BMI model, we used the 2011–2012 Korea  
34  
35 188 Health Panel survey and the resident registration-based population statistics. The base  
36  
37 189 population for POHEM-BMI (n=39,842,730), reflected the Korean population. Each Korean  
38  
39 190 respondent 19 years of age and older (n=11,501) in 2012 was replicated using their survey-  
40  
41 191 recorded weights to generate a simulated cohort of approximately 39,842,730 individuals.  
42  
43 192 Korea Health Panel survey data are nationally representative, and incorporate health status,  
44  
45 193 chronic diseases, health risk behaviors, and socio-demographic characteristics. Among them,  
46  
47 194 we extracted sex, age, current smoking status, physical activity, and the previous and current  
48  
49 195 years' BMI values; these variables were required for the predictive equation. We then used a  
50  
51 196 multiple linear regression model to estimate the BMI value using the extracted independent  
52  
53 197 variables as predictors. The POHEM-BMI model is auto-regressive and includes previous  
54  
55 198 BMI values as a main explanatory variable.[26] For comparison with other international  
56  
57  
58  
59  
60

199 studies using this model, the variable composition was the same, but the variable definition  
200 was not. The definition of variables was consistent with the definition of indicators in the  
201 Korea Health Statistics. A current smoker was an individual who reported smoking 'every  
202 day' or 'sometimes'. Practicing physical activity was defined as performing either intense  
203 physical activity for at least 10 continuous minutes a day, 20 minutes total per day, 3 days a  
204 week during the preceding week, or moderate physical activity for at least 30 minutes a day,  
205 5 days a week during the preceding week. [Height and weight, which are components of BMI,](#)  
206 [were based on self-reported data.](#)

### 207 **Simulation: Annual updates and risk transition**

208 The study population was updated by aging each person by 1 year and changing the total  
209 population size based on population statistics, population projections, and complete life tables  
210 categorized by sex and age from Korean Statistics. For population projections, we assumed a  
211 medium growth scenario in terms of birth rate, life expectancy, and international migration.  
212 Each person's BMI was updated annually by applying a predictive equation that incorporates  
213 his/her own characteristics. The transition probability for each stochastic characteristic was  
214 calculated based on a generalized linear model.

215 We assumed that the current individual behavioral patterns persisted, and no new  
216 factors arose to prevent obesity, like the original POHEM-BMI. We also assumed that the  
217 attributes of 19-year-old individuals, which were entered annually, remained similar each  
218 year.

### 219 **Model validation and calibration**

220 We established the model's validity by comparing the projected BMI median  
221 obtained from the prediction model to estimates obtained from the Korea Health Panel  
222 survey. We set the calibration cutoff point to 5% and adjusted the model by comparing the  
223 difference between the median BMI estimates observed from the Korea Health Panel survey

224 and the values derived from the prediction model categorized by sex and age. We analyzed  
 225 the BMIs of each group by comparing the 2016 data available from the Korea Health Panel  
 226 with the most recent data. We accepted a difference of less than 5% overall in the sex- and  
 227 age-categorized groups. Finally, we adjusted the demographics of the 2040 population so that  
 228 the predictions were within a 5% margin of error. In this study, all necessary data for model  
 229 building and projection were obtained from publicly available data and does not include any  
 230 identifiable personal information. Hence, no ethical approval was required, [in addition to the  
 231 ethical and governance approvals granted by the Korea Institute for Health and Social Affairs  
 232 \(KIHASA\), which conducts the Korea Health Panel Survey](#). All participants gave written  
 233 informed consent before they completed the survey.

### 234 **Projection**

235 The model projected the BMI of each person from 2017 to 2040. Based on demographic  
 236 characteristics, the projections were then aggregated by year for each of the predefined  
 237 subgroups. The various trends observed in the Korean population data were used to generate  
 238 algorithms that were applied to future projections.

### 239 **Model outputs**

240 The BMI distributions were calculated overall and by sex. Individuals with a BMI  $\geq 25$   
 241 kg/m<sup>2</sup> were obese according to the Guidelines for the Management of Obesity in Korea,  
 242 which is not the internationally accepted standard (Table 1). All analyses in this study were  
 243 performed using STATA version 13 (StataCorp LLC, College Station, TX, USA).

244

245 **Table 1** BMI classification of South Korea

| Classification | Body mass index<br>(kg/m <sup>2</sup> ) |
|----------------|-----------------------------------------|
|----------------|-----------------------------------------|

|                 |             |
|-----------------|-------------|
| Underweight     | < 18.5      |
| Normal          | 18.5 – 22.9 |
| Pre-obese       | 23 – 24.9   |
| Obese class I   | 25 – 29.9   |
| Obese class II  | 30 – 34.9   |
| Obese class III | ≥ 35        |

246

#### 247 **Patient and public involvement**

248 No patient involved

249

## 250 **RESULTS**

251 We compared the total number of the individuals and their characteristics in the  
 252 initial 2012 population to those in the projected 2040 population (Table 2). There were  
 253 39,842,730 adults who were 19 years of age or older in 2012 and 43,818,808 in 2040. The  
 254 male: female ratio was nearly 1:1 in both 2012 and 2040. Rapid aging of the Korean  
 255 population was clearly observed when comparing the 2 populations. The average age of  
 256 adults was expected to increase by 10.9 years (from 45.69 years in 2012 to 56.59 years in  
 257 2040 [from 44.57 to 55.54 years among men and 46.77 to 57.63 years among women]). In  
 258 2012, the proportion of young people (those in the 19–39 and 40–64-year age groups  
 259 combined) accounted for approximately 85.54% of the adult population, while the proportion  
 260 of individuals aged 65 years and older was relatively low at approximately 14%. However,  
 261 the age group structure in South Korea 28 years later (2040) is predicted to be quite different,  
 262 as the proportion of individuals 19–64 years (i.e., the working age population) was only

1  
2  
3  
4 263 60.95% of the adult population, while the proportion of the elderly population ( $\geq 65$  years)

5  
6  
7 264 was estimated to be almost 40% of the total adult population.

8  
9 265  
10  
11  
12  
13  
14  
15  
16  
17  
18  
19  
20  
21  
22  
23  
24  
25  
26  
27  
28  
29  
30  
31  
32  
33  
34  
35  
36  
37  
38  
39  
40  
41  
42  
43  
44  
45  
46  
47  
48  
49  
50  
51  
52  
53  
54  
55  
56  
57  
58  
59  
60

For peer review only

266 **Table 2** Comparison of number of people, South Korea, 2012 and 2040

|                  | <i>Population at baseline (2012)</i> |                   |               |                   |               |                   | <i>Projected population (2040)</i> |                   |               |                   |               |                   |
|------------------|--------------------------------------|-------------------|---------------|-------------------|---------------|-------------------|------------------------------------|-------------------|---------------|-------------------|---------------|-------------------|
|                  | <b>Men</b>                           |                   | <b>Women</b>  |                   | <b>Total</b>  |                   | <b>Men</b>                         |                   | <b>Women</b>  |                   | <b>Total</b>  |                   |
|                  | <b>Number</b>                        | <b>Percentage</b> | <b>Number</b> | <b>Percentage</b> | <b>Number</b> | <b>Percentage</b> | <b>Number</b>                      | <b>Percentage</b> | <b>Number</b> | <b>Percentage</b> | <b>Number</b> | <b>Percentage</b> |
| Number of people | 19,709,628                           |                   | 20,133,102    |                   | 39,842,730    |                   | 21,717,128                         |                   | 22,101,680    |                   | 43,818,808    |                   |
| Age (mean±s.d.)  | 44.57±15.60                          |                   | 46.77±16.92   |                   | 45.69±16.31   |                   | 55.54±18.60                        |                   | 57.63±19.33   |                   | 56.59±19.00   |                   |
| 19-39            | 7,985,737                            | 40.52%            | 7,505,824     | 37.29%            | 15,491,561    | 38.88%            | 4,873,740                          | 22.45%            | 4,588,867     | 20.76%            | 9,462,607     | 21.60%            |
| 40-64            | 9,360,489                            | 47.49%            | 9,230,871     | 45.85%            | 18,591,360    | 46.66%            | 8,896,886                          | 40.97%            | 8,349,634     | 37.78%            | 17,246,520    | 39.35%            |
| 65 and above     | 2,363,402                            | 11.98%            | 3,396,407     | 16.87%            | 5,759,809     | 14.45%            | 7,946,502                          | 36.59%            | 9,163,179     | 41.45%            | 17,109,681    | 39.05%            |

|                   |          |       |          |       |           |       |  |  |  |  |  |  |
|-------------------|----------|-------|----------|-------|-----------|-------|--|--|--|--|--|--|
| Smoker            | 8,879,03 | 45.05 | 450,946  | 2.24% | 9,329,983 | 23.42 |  |  |  |  |  |  |
|                   | 7        | %     |          |       |           | %     |  |  |  |  |  |  |
| Physical activity | 5,199,27 | 26.38 | 3,103,03 | 15.41 | 8,302,309 | 20.84 |  |  |  |  |  |  |
|                   | 3        | %     | 6        | %     |           | %     |  |  |  |  |  |  |

267

268

For peer review only

1  
2  
3  
4  
5  
6  
7  
8  
9  
10  
11  
12  
13  
14  
15  
16  
17  
18  
19  
20  
21  
22  
23  
24  
25  
26  
27  
28  
29  
30  
31  
32  
33  
34  
35  
36  
37  
38  
39  
40  
41  
42  
43  
44  
45  
46



269 There was no significant difference between the median BMIs in 2012 and 2040; however, according to the BMI classification in South Korea,  
 270 approximately 41.48% of the adult population was 'normal' in 2012, whereas only 24.88% of the population was predicted to be the same in  
 271 2040. (see Table 3) On the other hand, the 'pre-obese' group was expected to account for approximately 70% of the total adult population.

272 **Table 3** Comparison of number of people, by BMI classification, South Korea, 2012 and 2040

|                                        | <i>Population at baseline (2012)</i> |                     |               |                     |               |                     | <i>Projected population (2040)</i> |                     |               |                     |               |                     |
|----------------------------------------|--------------------------------------|---------------------|---------------|---------------------|---------------|---------------------|------------------------------------|---------------------|---------------|---------------------|---------------|---------------------|
|                                        | <b>Men</b>                           |                     | <b>Women</b>  |                     | <b>Total</b>  |                     | <b>Men</b>                         |                     | <b>Women</b>  |                     | <b>Total</b>  |                     |
|                                        | <b>Number</b>                        | <b>(Percentage)</b> | <b>Number</b> | <b>(Percentage)</b> | <b>Number</b> | <b>(Percentage)</b> | <b>Number</b>                      | <b>(Percentage)</b> | <b>Number</b> | <b>(Percentage)</b> | <b>Number</b> | <b>(Percentage)</b> |
| BMI (median)                           | 23.59                                |                     | 22.41         |                     | 23.04         |                     | 23.97                              |                     | 23.17         |                     | 23.55         |                     |
| Number of people by BMI classification |                                      |                     |               |                     |               |                     |                                    |                     |               |                     |               |                     |
| Underweight                            | 840,251                              | (4.26)              | 2,368,051     | (11.76)             | 3,208,302     | (8.05)              | 98,954                             | (0.46)              | 152,500       | (0.69)              | 251,454       | (0.57)              |
| Normal                                 | 7,414,311                            | (37.62)             | 9,114,015     | (45.27)             | 16,528,326    | (41.48)             | 2,228,567                          | (10.26)             | 8,671,481     | (39.23)             | 10,900,048    | (24.88)             |
| Pre-obese                              | 5,264,861                            | (26.71)             | 4,207,675     | (20.90)             | -             | (23.77)             | 17,641,666                         | (81.23)             | 13,055,483    | (59.08)             | 30,697,158    | (70.05)             |

|              |          |         |          |         |          |         |           |        |         |        |           |        |
|--------------|----------|---------|----------|---------|----------|---------|-----------|--------|---------|--------|-----------|--------|
|              | 6        |         | 3        |         | 9,472,53 | )       | 8         |        | 2       | 7)     | 0         |        |
|              |          |         |          |         | 9        |         |           |        |         |        |           |        |
| Obese class– | 5,867,36 | (29.77) | 4,046,60 | (20.10) | -        | (24.88) | 1,712,332 | (7.88) | 221,829 | (1.00) | 1,934,161 | (4.41) |
| I            | 9        |         | 7        |         | 9,913,97 | )       |           |        |         | )      |           |        |
|              |          |         |          |         | 6        |         |           |        |         |        |           |        |
| Obese class– | 318,297  | (-1.61) | —        | (-1.61) | —        | (-1.61) | —33,455   | (0.15) | 388     | (0.00) | —33,843   | (0.08) |
| II           |          |         | 324,205  |         | 642,502  |         |           |        |         | )      |           |        |
| Obese class– | —4,534   | (-0.02) | —        | (-0.36) | —        | (0.19)  | —2,152    | (0.01) | —0      | (0.00) | —2,152    | (0.00) |
| III          |          |         | 72,551   |         | 77,085   |         |           |        |         | )      |           |        |

273

274

1  
2  
3 275 The model was well calibrated in both the initial population and from 2017 to 2040.  
4  
5 276 Differences in each of the variables estimated between 2013 and 2016, which were derived  
6  
7 277 from the Korea Health Panel data, were within the 5% range only when using the predictive  
8  
9 278 model. Additionally, when compared to the population structure for 2040 (the final year) as  
10  
11 279 predicted by Statistics Korea, the total population, gender, and age-specific ratio were similar.

12  
13  
14 280 Figure 2 shows the median predicted BMIs between 2017 and 2040. Each median  
15  
16 281 BMI value from 2013 to 2016 was estimated from the Korea Health Panel survey. The  
17  
18 282 median BMI for the entire adult population is predicted to increase very slightly from 23.23  
19  
20 283 kg/m<sup>2</sup> in 2018 to 23.53 kg/m<sup>2</sup> in 2036 and is expected to remain steady thereafter. The  
21  
22 284 predicted median BMI trends are similar for men; the median BMI in adult men was  
23  
24 285 projected to increase only slightly, from 23.74 kg/m<sup>2</sup> in 2018 to 23.95 kg/m<sup>2</sup> in 2036 and then  
25  
26 286 almost plateau thereafter. However, women were expected to experience a relatively steep  
27  
28 287 rise compared to that of men; the median BMI in adult women was projected to increase from  
29  
30 288 22.66 kg/m<sup>2</sup> in 2018 to 23.17 kg/m<sup>2</sup> in 2040.

31  
32  
33 289  
34  
35 290 The BMI distributions for men and women from 2012 to 2040 are shown in Figure 3.  
36  
37 291 [There was no significant difference between the median BMIs in 2012 and 2040, but the](#)  
38  
39 292 [results according to the BMI classifications showed large changes.](#) The proportions of ‘pre-  
40  
41 293 obese’ individuals in both sexes are predicted to increase dramatically over time, while the  
42  
43 294 proportions of individuals who are classified as ‘normal’ and ‘obese’ will gradually decrease.  
44  
45 295 As of 2025, 52.35% of all male adults were expected to be pre-obese, with that proportion  
46  
47 296 expected to be close to 81.23% by 2040. Moreover, 53.24% of all women were expected to  
48  
49 297 be ‘pre-obese’ by 2035, with the proportion rising to almost 59.07% by 2040.

50  
51 298  
52  
53 299 [According to the BMI classification by age group, in South Korea, in 2012, about](#)  
54  
55  
56  
57  
58  
59  
60

300 20.36% of the population aged 19-39 were 'pre-obese', but in 2040, it increased to 39.59%,  
 301 almost double. The proportion of the 'normal' population was almost the same in 2012 and  
 302 2040, and the 'obese class I' decreased by nearly half. However, in the population aged 40  
 303 to 64 and over 65, the proportion of 'pre-obese' increased almost three times in 2040  
 304 compared to that in 2012, and the proportion of 'normal' decreased to less than 20% (Table  
 305 3).

306

307 **Table 3** Comparison of number of people, by BMI classification, South Korea, 2012 and 2040

|                                              | <i>Population at baseline (2012)</i> |              |            | <i>Projected population (2040)</i> |              |            |
|----------------------------------------------|--------------------------------------|--------------|------------|------------------------------------|--------------|------------|
|                                              | <b>19-39</b>                         | <b>40-64</b> | <b>65-</b> | <b>19-39</b>                       | <b>40-64</b> | <b>65-</b> |
| Number of people                             | 15,491,561                           | 18,591,360   | 5,759,809  | 9,462,607                          | 17,246,520   | 17,109,681 |
| BMI (median)%                                | 22.37                                | 23.52        | 23.02      | 23.07                              | 23.64        | 23.58      |
| Distribution of people by BMI classification |                                      |              |            |                                    |              |            |
| Underweight %                                | 11.76                                | 5.10         | 7.60       | 2.66                               | 0.00         | 0.00       |
| Normal %                                     | 45.66                                | 37.81        | 42.12      | 45.68                              | 19.89        | 18.40      |
| Pre-obese %                                  | 20.36                                | 26.51        | 24.10      | 39.59                              | 76.60        | 80.31      |
| Obese class I %                              | 20.67                                | 28.40        | 24.85      | 11.70                              | 3.51         | 1.29       |
| Obese class II %                             | 1.51                                 | 1.79         | 1.30       | 0.36                               | 0.00         | 0.00       |
| Obese class III %                            | 0.03                                 | 0.38         | 0.02       | 0.02                               | 0.00         | 0.00       |

## 308 DISCUSSION

309 The purpose of this study was to predict the prevalence of obesity in South Korea in  
310 the year 2040 using a microsimulation model. In this study, we strove to predict future adult  
311 obesity rates in South Korea using the POHEM-BMI, which was developed by Statistics  
312 Canada. Summarizing the predicted results, the median BMI of South Korea's adult  
313 population aged 19 years and older was expected to be 23.55 in 2040, while the percentage of  
314 'pre-obese' individuals was expected to increase over time. While it is encouraging that the  
315 proportion of 'obese' people (i.e., those with BMIs  $\geq 25$  kg/m<sup>2</sup>) in 2040 is predicted to be  
316 much lower than that in 2012, it is discouraging that the proportion of 'normal' individuals is  
317 also markedly lower. Most notably, the pre-obesity rate is predicted to rise dramatically. In  
318 addition to the sex and age variables, our model includes only smoking and physical activity  
319 as health-related behaviors. The distributions of these factors were assumed to remain equal  
320 across the years; hence, our data show that maintaining smoking and physical activity rates at  
321 2012 levels among adults will lead to a sharp increase in the 'pre-obese' population by 2040.

322 To the best of our knowledge, the only other study that predicted future obesity rates  
323 among South Korean adults was the investigation by Baik.[2] That study explored factors  
324 affecting adult as well as abdominal obesity, and constructed forecasting models to predict  
325 obesity prevalence rates in 2020 and 2030 using the Korea National Health and Nutritional  
326 Examination Survey (KNHANES). The prevalence rates of obesity among men and women  
327 in that study were predicted to be 47% and 32%, respectively, in 2020 and 62% and 37%,  
328 respectively, in 2030; these data were inconsistent with our results. [The differences in  
329 prediction results appeared to be caused by the different secondary sources and prediction  
330 models in the two studies. First, in Baik's study, a prediction model was constructed by  
331 applying a linear regression model and an autoregressive integrated moving average model  
332 using the KNHANES data. The dependent variable in the prediction model was BMI, and the](#)

1  
2  
3 333 independent variables included the survey year, age, marital status, job status, income status,  
4  
5 334 smoking, alcohol consumption, sleep duration, psychological factors, dietary intake, and  
6  
7 335 fertility rate. In contrast, in this study, the Korea Health Panel data was used as the data  
8  
9 336 source, and BMI was predicted by performing microsimulation with sex, age, smoking,  
10  
11 337 physical activity, and previous years' BMIs as independent variables. Therefore, the method  
12  
13 338 of measurement of the dependent variable, BMI differs between the studies; unlike the  
14  
15 339 KNHANES, which contains body-measured height and weight information, the Korea Health  
16  
17 340 Panel (although this is a representative data source) generates data based on self-reported by  
18  
19 341 respondents, which may underestimate obesity. ~~The differences appeared to be caused by the~~  
20  
21 342 ~~different secondary sources used in the 2 studies, as well as the different independent~~  
22  
23 343 ~~variables and prediction methodologies. In particular, Inevitably, the obesity rate in the initial~~  
24  
25 344 population according to the KNHANES tended to be higher; as such, a higher initial  
26  
27 345 prevalence rate would lead to a higher projection.[34] ~~Most importantly, Baik's study did not~~  
28  
29 346 ~~consider the preceding year's BMI, which was a major independent variable in our study; this~~  
30  
31 347 ~~may be a major explanation for the differences in findings between the 2 studies.~~

32  
33 348 We also tried to compare the results from this study with the predicted estimate by  
34  
35 349 country, but few studies have empirically predicted the prevalence of obesity in the future  
36  
37 350 using simulation models. One study compiled nationally-representative data from various  
38  
39 351 sources and predicted the future prevalence of overweight and obesity in Indian adults aged  
40  
41 352 20-69 years will reach 30.5% and 9.5% among men, 27.4% and 13.9% among women,  
42  
43 353 respectively, by 2040.[35] According to a study that estimated the prevalence of obesity in  
44  
45 354 the future through regression modeling, 42% of Americans were expected to be obese by  
46  
47 355 2030.[36] Similarly, a study that predicted the prevalence of obesity in Australian adults by  
48  
49 356 2025 using a multiple linear regression model predicted that 83% of male adults over the age  
50  
51 357 of 20 and 75% of female adults would be overweight or obese.[37] In all three countries,  
52  
53  
54  
55  
56  
57  
58  
59  
60

1  
2  
3 358 India, the United States, and Australia, overweight and obesity were defined according to the  
4  
5 359 classifications defined by the WHO, and much higher values were found than those in Korea.  
6  
7  
8 360 We also compared our results to those predicted in Canada using the same model, and 59% of  
9  
10 361 the adult Canadian population was predicted to be 'overweight or obese' by 2030.

11  
12 362 This study defined obesity by applying the BMI classification system according to  
13  
14 363 2018 Korean Society for the Study of Obesity guideline for the management of obesity in  
15  
16 364 Korea. It would be appropriate to use international standards for comparison; however, it is  
17  
18 365 necessary to reflect the situation of individual countries in the management of obesity for the  
19  
20 366 purpose of preventing and managing chronic diseases. Therefore, rather than emphasizing the  
21  
22 367 BMI classification criteria, more research is needed to **determine** the BMI values that can  
23  
24 368 significantly predict the occurrence of chronic diseases. In other words, it is necessary to  
25  
26 369 continuously accumulate sufficient epidemiologic evidence for the relationship between the  
27  
28 370 BMI and the actual risk of disease and death for Koreans, and based on such evidence, efforts  
29  
30 371 to establish appropriate diagnostic and medical standards for Koreans are needed. In  
31  
32 372 particular, the relationship is likely to vary by age and sex; hence, it should be considered too.  
33  
34 373 Here, the obesity standard has been applied collectively regardless of sex and age. However,  
35  
36 374 in order to deviate from a uniform approach to obesity, gender- and age-based approaches are  
37  
38 375 needed, considering the changes in hormones and body composition.

39  
40 376 Because health management policies including obesity management require a large  
41  
42 377 budget, it is most important to establish cost-effective policies. The results from this study  
43  
44 378 made it possible to determine the obese high-risk group by sex and age group, and estimate  
45  
46 379 medical needs. As it is necessary to apply obesity standards differently according to sex and  
47  
48 380 age group, it is difficult to set the 'National Health Promotion Comprehensive Plan' goals.  
49  
50 381 This plan needs to suggest additional, wider-ranging goals considering the characteristics of  
51  
52 382 each sex and age group, rather than presenting goals for obesity prevalence among adult men  
53  
54  
55  
56  
57  
58  
59  
60

1  
2  
3 383 and women. In this case, the goal should be presented at an achievable level in consideration  
4  
5 384 of future prediction patterns. Finally, systematic public health interventions, which are  
6  
7 385 tailored to individual characteristics need to be established.  
8  
9

10 386 Findings from this study should be interpreted with consideration of several  
11  
12 387 limitations. First, since a microsimulation model for predicting obesity prevalence has not  
13  
14 388 been developed in this country, we borrowed the model developed by Statistics Canada, and  
15  
16 389 it may not fit the domestic situation; nonetheless, we defined each variable in the predictive  
17  
18 390 equation according to the operational definition in Korea Health Statistics. However, if the  
19  
20 391 model is more suited to the domestic situation, besides sex, age, smoking, physical activity,  
21  
22 392 and previous year's BMI value, various factors related to BMI may be added to the predictors  
23  
24 393 of BMI. However, in this study, as we faithfully followed the existing model and explored the  
25  
26 394 possibility of domestic application, the process of constructing a prediction equation was  
27  
28 395 omitted. Therefore, not only is the definition of obesity different, but the predictors of BMI  
29  
30 396 include only sex, age, smoking, physical activity, and preceding year's BMI values. In the  
31  
32 397 future, research to develop a new model of microsimulation in the field of healthcare for  
33  
34 398 domestic conditions will be very valuable. In this process, it is necessary to consider practical  
35  
36 399 suitability and efficiency in selecting basic data, module-specific behavioral equations, and  
37  
38 400 variables for use in the model. Second, we had limited data sources. There is a difference  
39  
40 401 between the current prevalence of obesity calculated from the Korea Health Panel data used  
41  
42 402 in this study and the Korea Health Statistics using the KNHANES. As of 2011, the  
43  
44 403 prevalence of adult obesity in Korea Health Statistics was 31.9%, and the prevalence of adult  
45  
46 404 obesity calculated by the Korea Health Panel data was 23.7%, a difference of 8.2%.[38]  
47  
48 405 Unlike the Korea Health Statistics, which contains body-measured height and weight  
49  
50 406 information, the Korea Health Panel (although this is a representative data source) generates  
51  
52 407 data based on self-reported by respondents, which may underestimate obesity. As mentioned  
53  
54  
55  
56  
57  
58  
59  
60



1  
2  
3 408 earlier in the difference between the results of Baik's study, this difference originated from  
4  
5 409 the method of measuring BMI in the two data sources. However, in the POHEM-BMI model  
6  
7 410 used in this study, the BMI of the previous year was regarded as the main explanatory  
8  
9 411 variable, and therefore, the Korea Health panel data that followed the same participants once  
10  
11 412 a year was inevitably used. In addition, the original POHEM-BMI model includes the process  
12  
13 413 of converting self-reported BMI into a measured BMI, but we omitted this due to limitations  
14  
15 414 of the data source. Third, we assumed that the attributes of 19-year-old individuals entered  
16  
17 415 each year remain at a similar level each year. This means that the individual attributes of 19-  
18  
19 416 year-old adults are the same for 29 years from 2012 to 2040; thus, it can be considered  
20  
21 417 somewhat less realistic. In future studies, it is expected that more meaningful and realistic  
22  
23 418 results will be derived if the model is constructed by reflecting the trend of changes in the  
24  
25 419 attributes of the 19-year-old population and updating it according to the year.

26  
27 420 Nevertheless, our study is the first to examine the possibility of using  
28  
29 421 microsimulation to predict future BMI medians in South Korea. Additionally, the BMI of the  
30  
31 422 future adult population was predicted after considering the change in population structure at  
32  
33 423 the macro level as well as individual health behavior components at the micro level.

34  
35 424

## 36 37 425 **CONCLUSION**

38  
39 426 The key finding of this study is that by 2040, 70.05% of Korean adults are predicted  
40  
41 427 to be pre-obese. Utilizing data sources available in Korea, the possibility of applying and  
42  
43 428 expanding on the concept of microsimulation was explored. In future studies, a model  
44  
45 429 suitable for South Korea needs to be developed, and the effectiveness of specific health  
46  
47 430 policies ought to be assessed by applying various relevant scenarios to the basic forecasting  
48  
49 431 model.

50  
51 432

### 433 **Abbreviations**

434 BMI: body mass index; KNHANES: Korea National Health and Nutritional  
435 Examination Survey, POHEM: Population Health Model

### 436 **Authors' Contributions**

437 YS (the first author) designed the study, analyzed, and interpreted the data, and wrote  
438 the paper. YE participated in the statistical analysis. DS aided in the interpretation of the data  
439 and preparation of the manuscript. SJ (the corresponding author) directed this study. All  
440 authors read and approved the final version of the manuscript.

### 441 **Funding**

442 This work was supported by the National Research Foundation of Korea (NRF) grant  
443 funded by the Korea government (Ministry of Science and ICT) (No. 2017R1A2B4005876).  
444 The funding agency had no role in the study design, analysis and interpretation of the data, or  
445 the preparation of the manuscript.

### 446 **Competing Interests**

447 The authors declare that they have no competing interests.

### 448 **Ethics approval**

449 This study used publicly available data of Korea Health Panel Survey 2011-2012  
450 from the Korea Institute for Health and Social Affairs and the National Health Insurance,  
451 population statistics based on resident registration, population projections, complete life  
452 tables and future mortality rates from Statistics Korea. The dataset does not contain any  
453 identifiable personal information. Ethical approval was given by the Institutional Review  
454 Board of Korea University, Seoul, Korea (IRB No. KUIRB-2020-0018-01).

### 455 **Data sharing statement**

456 The Korea Health Panel Survey data used in this article is available in  
457 <https://www.khp.re.kr:444/eng/data/data.do>. Detailed information on the survey design and

1  
2  
3 458 data characteristics are provided at <https://www.khp.re.kr:444/eng/survey/sampling.do>.

4  
5 459 Population statistics, population projections, and complete life tables are available from

6  
7  
8 460 <http://kosis.kr/eng/>.

9  
10 461

11  
12 462

13  
14  
15  
16  
17  
18  
19  
20  
21  
22  
23  
24  
25  
26  
27  
28  
29  
30  
31  
32  
33  
34  
35  
36  
37  
38  
39  
40  
41  
42  
43  
44  
45  
46  
47  
48  
49  
50  
51  
52  
53  
54  
55  
56  
57  
58  
59  
60

For peer review only

463 **REFERENCES**

464

465 1. Ng M, Fleming T, Robinson M, et al. Global, regional, and national prevalence of

466 overweight and obesity in children and adults during 1980-2013: a systematic analysis for  
467 the Global Burden of Disease Study 2013. *Lancet* 2014;384:766–81.468 [https://doi.org/10.1016/S0140-6736\(14\)60460-8](https://doi.org/10.1016/S0140-6736(14)60460-8)469 2. Baik I. Forecasting obesity prevalence in Korean adults for the years 2020 and 2030 by the  
470 analysis of contributing factors. *Nutr Res Pract* 2018;12:25–7.471 <https://dx.doi.org/10.4162/nrp.2018.12.3.251>472 3. Kim D, Ahn C, Nam SY. Prevalence of obesity in Korea. *Obesity Rev* 2005;6:117–21.473 <https://doi.org/10.1111/j.1467-789X.2005.00173.x>474 4. Okosun IS, Chandra KMD, Choi S, et al. Hypertension and type 2 diabetes comorbidity in  
475 adults in the United States: Risk of overall and regional adiposity. *Obes Res* 2001;9:1–9.476 <https://doi.org/10.1038/oby.2001.1>

477 5. Krauss RM, Winston M, Fletcher BJ, et al. Obesity: impact on cardiovascular disease.

478 *Circulation* 1998;98:1472–6.479 6. Chin K, Ohi M. Obesity and obstructive sleep apnea syndrome. *Intern Med* 1999;38:200–480 2. <https://doi.org/10.2169/internalmedicine.38.200>481 7. Wallström P, Bjartell A, Gullberg B, et al. A prospective Swedish study on body size, body  
482 composition, diabetes, and prostate cancer risk. *Brit J Cancer* 2009;100:1799–805.483 <https://doi.org/10.1038/sj.bjc.6605077>484 8. Guh DP, Zhang W, Bansback N, et al. The incidence of comorbidities related to obesity  
485 and overweight: a systematic review and meta-analysis. *BMC Public Health* 2009;9:88.486 <https://doi.org/10.1186/1471-2458-9-88>487 9. Coggon D, Reading I, Croft P, et al. Knee osteoarthritis and obesity. *Int J Obes Relat*

- 1  
2  
3 488 *Metab Disord* 2001;25:622–7. <https://doi.org/10.1038/sj.ijo.0801585>
- 4  
5 489 10. Stenholm S, Rantanen T, Alanen E, et al. Obesity history as a predictor of walking  
6  
7 490 limitation at old age. *Obesity* 2007;15:929–38. <https://doi.org/10.1038/oby.2007.583>
- 8  
9 491 11. Alley DE, Chang VW. The changing relationship of obesity and disability, 1988–2004.  
10  
11 492 *JAMA* 2007;298:2020–7. <https://doi.org/10.1001/jama.298.17.2020>
- 12  
13 493 12. Larsson U, Karlsson J, Sullivan M. Impact of overweight and obesity on health-related  
14  
15 494 quality of life—a Swedish population study. *Int J Obes Relat Metab Disord* 2002;26:417–24.  
16  
17 495 <https://doi.org/10.1038/sj.ijo.0801919>
- 18  
19 496 13. Zaninotto P, Pierce M, Breeze E, et al. BMI and waist circumference as predictors of  
20  
21 497 well-being in older adults: findings from the English Longitudinal Study of Ageing. *Obesity*  
22  
23 498 2010;18:1981–7. <https://doi.org/10.1038/oby.2009.497>
- 24  
25 499 14. Emerging Risk Factors Collaboration, Wormser D, Kaptoge S, et al. Separate and  
26  
27 500 combined associations of body-mass index and abdominal adiposity with cardiovascular  
28  
29 501 disease: Collaborative analysis of 58 prospective studies. *Lancet* 2011;377:1085–95.  
30  
31 502 [https://doi.org/10.1016/S0140-6736\(11\)60105-0](https://doi.org/10.1016/S0140-6736(11)60105-0)
- 32  
33 503 15. The Global Burden of Metabolic Risk Factors for Chronic Diseases Collaboration (BMI  
34  
35 504 Mediated Effects), Lu Y, Hajifathalian K, et al. Metabolic mediators of the effects of body-  
36  
37 505 mass index, overweight, and obesity on coronary heart disease and stroke: A pooled  
38  
39 506 analysis of 97 prospective cohorts with 1.8 million participants. *Lancet* 2014;383:970–83.  
40  
41 507 [https://doi.org/10.1016/S0140-6736\(13\)61836-X](https://doi.org/10.1016/S0140-6736(13)61836-X)
- 42  
43 508 16. Renehan AG, Tyson M, Egger M, et al. Body-mass index and incidence of cancer: A  
44  
45 509 systematic review and meta-analysis of prospective observational studies. *Lancet*  
46  
47 510 2008;371:569–78. [https://doi.org/10.1016/S0140-6736\(08\)60269-X](https://doi.org/10.1016/S0140-6736(08)60269-X)
- 48  
49 511 17. Bhimjiyani A, Knuchel-Takano A, Hunt D, et al. Tipping the scales: Why preventing  
50  
51 512 obesity makes economic sense. Technical Report 2016.
- 52  
53  
54  
55  
56  
57  
58  
59  
60

- 1  
2  
3 513 [https://www.cancerresearchuk.org/sites/default/files/tipping\\_the\\_scales\\_-](https://www.cancerresearchuk.org/sites/default/files/tipping_the_scales_-_cruk_full_report11.pdf)  
4  
5 514 [cruk\\_full\\_report11.pdf](https://www.cancerresearchuk.org/sites/default/files/tipping_the_scales_-_cruk_full_report11.pdf) (accessed 26 Jan 2020).  
6  
7  
8 515 18. Wang YC, McPherson K, Marsh T, et al. Health and economic burden of the projected  
9  
10 516 obesity trends in the USA and the UK. *Lancet* 2011;378:815–25.  
11  
12 517 [https://doi.org/10.1016/S0140-6736\(11\)60814-3](https://doi.org/10.1016/S0140-6736(11)60814-3)  
13  
14 518 19. Lee M. Half of the socioeconomic costs of obesity are ‘medical costs’. Korea Biomedical  
15  
16 519 Review (2018, December 10).  
17  
18 520 <http://www.docdocdoc.co.kr/news/articleView.html?idxno=1063317/> (accessed 2020,  
19  
20 521 [January 29](http://www.docdocdoc.co.kr/news/articleView.html?idxno=1063317/))  
21  
22  
23 522 20. Low S, Chin MC, Ma S, et al. Rationale for redefining obesity in Asians. *Ann Acad Med*  
24  
25 523 *Singapore* 2009;38:66–9.  
26  
27  
28 524 21. The World Health Organization Western Pacific Region, International Association for the  
29  
30 525 Study of Obesity. The Asia-Pacific Perspective: Redefining obesity and its treatment.  
31  
32 526 Sydney, Australia: Health Communications Australia Pty Limited; 2000.  
33  
34  
35 527 22. Seo MH, Kim YH, Han K, et al. Prevalence of obesity and incidence of obesity-related  
36  
37 528 comorbidities in Koreans based on National Health Insurance Service Health Checkup Data  
38  
39 529 2006-2015 (*J Obes Metab Syndr* 2018;27:46–52). *J Obes Metab Syndr* 2018;27:198–9.  
40  
41 530 <https://doi.org/10.7570/jomes.2018.27.3.198>  
42  
43  
44 531 23. Seo MH, Lee WY, Kim SS, et al. 2018 Korean Society for the Study of Obesity guideline  
45  
46 532 for the management of obesity in Korea. *J Obes Metab Syndr* 2019;28:40–5.  
47  
48 533 <https://doi.org/10.7570/jomes.2019.28.1.40>  
49  
50  
51 534 24. Kim D. Estimation of disease and disease burden by health behavior. Sejong City: Korea  
52  
53 535 Institute for Health and Social Affairs 2018.  
54  
55  
56 536 25. Çağlayan Ç, Terawaki H, Chen Q, et al. Microsimulation Modeling in Oncology. *JCO*  
57  
58 537 *Clin Cancer Inform* 2018;2:1–11. <https://doi.org/10.1200/CCI.17.00029>  
59  
60

- 1  
2  
3 538 26. Hennessy D, Garner R, Flanagan WM, et al. Development of a population-based  
4  
5 539 microsimulation model of body mass index. *Health Rep* 2017;28:20–30.  
6  
7  
8 540 27. Spielauer M. Dynamic microsimulation of health care demand, health care finance and  
9  
10 541 the economic impact of health behaviours: survey and review. 2007 *International Journal*  
11  
12 542 *of Microsimulation* 2007;1:35–53.  
13  
14  
15 543 28. The National Academies of Sciences, Engineering, and Medicine. Assessing prevalence  
16  
17 544 and trends in obesity: Navigating the evidence. Washington DC: The National Academies  
18  
19 545 Press 2016.  
20  
21  
22 546 29. Soyiri IN, Reidpath DD. An overview of health forecasting. *Environ Health Prev Med*  
23  
24 547 2013;18:1–9. <https://doi.org/10.1007/s12199-012-0294-6>  
25  
26 548 30. Pineda E, Sanchez-Romero LM, Brown M, et al. Forecasting future trends in obesity  
27  
28 549 across Europe: The value of improving surveillance. *Obes Facts* 2018;11:360–71.  
29  
30 550 <https://doi.org/10.1159/000492115>  
31  
32  
33 551 31. Zucchelli E, Jones A, Rice N. The evaluation of health policies through dynamic  
34  
35 552 microsimulation methods. *International Journal of Microsimulation* 2012;5:2–20.  
36  
37  
38 553 32. Hennessy DA, Flanagan WM, Tanuseputro P, et al. The Population Health Model  
39  
40 554 (POHEM): an overview of rationale, methods and applications. *Popul Health Metrics*  
41  
42 555 2015;13:24. <https://doi.org/10.1186/s12963-015-0057-x>  
43  
44  
45 556 33. Manuel DG, Tuna M, Hennessy D, et al. Projections of preventable risks for  
46  
47 557 cardiovascular disease in Canada to 2021: a microsimulation modelling approach. *CMAJ*  
48  
49 558 *Open* 2014;2:E94–101. <https://doi.org/10.9778/cmajo.2012-0015>  
50  
51  
52 559 34. Lin J, Thompson TJ, Cheng YJ, et al. Projection of the future diabetes burden in the  
53  
54 560 United States through 2060. *Popul Health Metr* 2018;16:9. [https://doi.org/10.1186/s12963-](https://doi.org/10.1186/s12963-018-0166-4)  
55  
56 561 [018-0166-4](https://doi.org/10.1186/s12963-018-0166-4)  
57  
58 562 35. Luhar S, Timæus IM, Jones R, et al. Forecasting the prevalence of overweight and obesity

- 1  
2  
3 563 in India to 2040. *PloS One* 2020;15:e0229438.  
4  
5 564 36. Finkelstein EA, Khavjou OA, Thompson H, et al. Obesity and severe obesity forecasts  
6  
7 565 through 2030. *Am J Prev Med* 2012;42:563–70.  
8  
9  
10 566 37. Haby MM, Markwick A, Peeters A, et al. Future predictions of body mass index and  
11  
12 567 overweight prevalence in Australia, 2005–2025. *Health Promot Int* 2012;27:250–60.  
13  
14 568 38. Choi JS, Choi SE, Yeom AR, et al. A Report on the Korea Health Panel Survey of 2011.  
15  
16  
17 569 Korea Institute for Health and Affairs. 2013.  
18  
19 570  
20  
21 571  
22  
23  
24  
25  
26  
27  
28  
29  
30  
31  
32  
33  
34  
35  
36  
37  
38  
39  
40  
41  
42  
43  
44  
45  
46  
47  
48  
49  
50  
51  
52  
53  
54  
55  
56  
57  
58  
59  
60



1  
2  
3 572 **Figure legends**  
4

5 573 **Figure 1** Summary of data sources and methods used to generate and validate projections of  
6  
7  
8 574 distribution of BMI categories in South Korea, 2012–2040  
9

10 575 **Figure 2** Population Health Model (POHEM) projections of median BMI in South Korea,  
11  
12 576 2012–2040  
13

14 577 **Figure 3A** Projection of distribution of BMI, adults aged 19 years and older, South Korea,  
15  
16  
17 578 2012–2040  
18

19 579 **Figure 3B** Projection of distribution of BMI, men aged 19 years and older, South Korea,  
20  
21 580 2012–2040  
22

23  
24 581 **Figure 3C** Projection of distribution of BMI, women aged 19 years and older, South Korea,  
25  
26 582 2012–2040  
27

28 583  
29  
30  
31  
32  
33  
34  
35  
36  
37  
38  
39  
40  
41  
42  
43  
44  
45  
46  
47  
48  
49  
50  
51  
52  
53  
54  
55  
56  
57  
58  
59  
60

## STROBE Statement—checklist of items that should be included in reports of observational studies

|                              | Item No | Recommendation                                                                                                                                                                                                                                                                                                                                                                                                                                                         | Page No |
|------------------------------|---------|------------------------------------------------------------------------------------------------------------------------------------------------------------------------------------------------------------------------------------------------------------------------------------------------------------------------------------------------------------------------------------------------------------------------------------------------------------------------|---------|
| <b>Title and abstract</b>    | 1       | (a) Indicate the study's design with a commonly used term in the title or the abstract                                                                                                                                                                                                                                                                                                                                                                                 | 1-2     |
|                              |         | (b) Provide in the abstract an informative and balanced summary of what was done and what was found                                                                                                                                                                                                                                                                                                                                                                    | 2       |
| <b>Introduction</b>          |         |                                                                                                                                                                                                                                                                                                                                                                                                                                                                        |         |
| Background/rationale         | 2       | Explain the scientific background and rationale for the investigation being reported                                                                                                                                                                                                                                                                                                                                                                                   | 4-6     |
| Objectives                   | 3       | State specific objectives, including any prespecified hypotheses                                                                                                                                                                                                                                                                                                                                                                                                       | 6       |
| <b>Methods</b>               |         |                                                                                                                                                                                                                                                                                                                                                                                                                                                                        |         |
| Study design                 | 4       | Present key elements of study design early in the paper                                                                                                                                                                                                                                                                                                                                                                                                                | 7       |
| Setting                      | 5       | Describe the setting, locations, and relevant dates, including periods of recruitment, exposure, follow-up, and data collection                                                                                                                                                                                                                                                                                                                                        | 7-8     |
| Participants                 | 6       | (a) <i>Cohort study</i> —Give the eligibility criteria, and the sources and methods of selection of participants. Describe methods of follow-up<br><i>Case-control study</i> —Give the eligibility criteria, and the sources and methods of case ascertainment and control selection. Give the rationale for the choice of cases and controls<br><i>Cross-sectional study</i> —Give the eligibility criteria, and the sources and methods of selection of participants | 8-9     |
|                              |         | (b) <i>Cohort study</i> —For matched studies, give matching criteria and number of exposed and unexposed<br><i>Case-control study</i> —For matched studies, give matching criteria and the number of controls per case                                                                                                                                                                                                                                                 | -       |
| Variables                    | 7       | Clearly define all outcomes, exposures, predictors, potential confounders, and effect modifiers. Give diagnostic criteria, if applicable                                                                                                                                                                                                                                                                                                                               | 7-9     |
| Data sources/<br>measurement | 8*      | For each variable of interest, give sources of data and details of methods of assessment (measurement). Describe comparability of assessment methods if there is more than one group                                                                                                                                                                                                                                                                                   | 7-9     |
| Bias                         | 9       | Describe any efforts to address potential sources of bias                                                                                                                                                                                                                                                                                                                                                                                                              | 9       |
| Study size                   | 10      | Explain how the study size was arrived at                                                                                                                                                                                                                                                                                                                                                                                                                              | 7       |
| Quantitative variables       | 11      | Explain how quantitative variables were handled in the analyses. If applicable, describe which groupings were chosen and why                                                                                                                                                                                                                                                                                                                                           | 7-8     |
| Statistical methods          | 12      | (a) Describe all statistical methods, including those used to control for confounding                                                                                                                                                                                                                                                                                                                                                                                  | 7-9     |
|                              |         | (b) Describe any methods used to examine subgroups and interactions                                                                                                                                                                                                                                                                                                                                                                                                    | -       |
|                              |         | (c) Explain how missing data were addressed                                                                                                                                                                                                                                                                                                                                                                                                                            | -       |
|                              |         | (d) <i>Cohort study</i> —If applicable, explain how loss to follow-up was addressed<br><i>Case-control study</i> —If applicable, explain how matching of cases and controls was addressed<br><i>Cross-sectional study</i> —If applicable, describe analytical methods taking account of sampling strategy                                                                                                                                                              | 9       |
|                              |         | (e) Describe any sensitivity analyses                                                                                                                                                                                                                                                                                                                                                                                                                                  | -       |

Continued on next page

| <b>Results</b>           |     |                                                                                                                                                                                                              |       |
|--------------------------|-----|--------------------------------------------------------------------------------------------------------------------------------------------------------------------------------------------------------------|-------|
| Participants             | 13* | (a) Report numbers of individuals at each stage of study—eg numbers potentially eligible, examined for eligibility, confirmed eligible, included in the study, completing follow-up, and analysed            | 10    |
|                          |     | (b) Give reasons for non-participation at each stage                                                                                                                                                         | -     |
|                          |     | (c) Consider use of a flow diagram                                                                                                                                                                           | -     |
| Descriptive data         | 14* | (a) Give characteristics of study participants (eg demographic, clinical, social) and information on exposures and potential confounders                                                                     | 10-13 |
|                          |     | (b) Indicate number of participants with missing data for each variable of interest                                                                                                                          | 14    |
|                          |     | (c) <i>Cohort study</i> —Summarise follow-up time (eg, average and total amount)                                                                                                                             | 10-11 |
| Outcome data             | 15* | <i>Cohort study</i> —Report numbers of outcome events or summary measures over time                                                                                                                          | 14    |
|                          |     | <i>Case-control study</i> —Report numbers in each exposure category, or summary measures of exposure                                                                                                         | -     |
|                          |     | <i>Cross-sectional study</i> —Report numbers of outcome events or summary measures                                                                                                                           | -     |
| Main results             | 16  | (a) Give unadjusted estimates and, if applicable, confounder-adjusted estimates and their precision (eg, 95% confidence interval). Make clear which confounders were adjusted for and why they were included | 14-15 |
|                          |     | (b) Report category boundaries when continuous variables were categorized                                                                                                                                    | 14-15 |
|                          |     | (c) If relevant, consider translating estimates of relative risk into absolute risk for a meaningful time period                                                                                             | -     |
| Other analyses           | 17  | Report other analyses done—eg analyses of subgroups and interactions, and sensitivity analyses                                                                                                               | -     |
| <b>Discussion</b>        |     |                                                                                                                                                                                                              |       |
| Key results              | 18  | Summarise key results with reference to study objectives                                                                                                                                                     | 16    |
| Limitations              | 19  | Discuss limitations of the study, taking into account sources of potential bias or imprecision. Discuss both direction and magnitude of any potential bias                                                   | 18-20 |
| Interpretation           | 20  | Give a cautious overall interpretation of results considering objectives, limitations, multiplicity of analyses, results from similar studies, and other relevant evidence                                   | 18-20 |
| Generalisability         | 21  | Discuss the generalisability (external validity) of the study results                                                                                                                                        | 19    |
| <b>Other information</b> |     |                                                                                                                                                                                                              |       |
| Funding                  | 22  | Give the source of funding and the role of the funders for the present study and, if applicable, for the original study on which the present article is based                                                | 21    |

\*Give information separately for cases and controls in case-control studies and, if applicable, for exposed and unexposed groups in cohort and cross-sectional studies.

**Note:** An Explanation and Elaboration article discusses each checklist item and gives methodological background and published examples of transparent reporting. The STROBE checklist is best used in conjunction with this article (freely available on the Web sites of PLoS Medicine at <http://www.plosmedicine.org/>, Annals of Internal Medicine at <http://www.annals.org/>, and Epidemiology at <http://www.epidem.com/>). Information on the STROBE Initiative is available at [www.strobe-statement.org](http://www.strobe-statement.org).

# BMJ Open

## Projecting the prevalence of obesity in South Korea through 2040: a microsimulation modeling approach

|                                 |                                                                                                                                                                                                                                                                                                                                                                                                                                                                                                                                              |
|---------------------------------|----------------------------------------------------------------------------------------------------------------------------------------------------------------------------------------------------------------------------------------------------------------------------------------------------------------------------------------------------------------------------------------------------------------------------------------------------------------------------------------------------------------------------------------------|
| Journal:                        | <i>BMJ Open</i>                                                                                                                                                                                                                                                                                                                                                                                                                                                                                                                              |
| Manuscript ID                   | bmjopen-2020-037629.R3                                                                                                                                                                                                                                                                                                                                                                                                                                                                                                                       |
| Article Type:                   | Original research                                                                                                                                                                                                                                                                                                                                                                                                                                                                                                                            |
| Date Submitted by the Author:   | 03-Dec-2020                                                                                                                                                                                                                                                                                                                                                                                                                                                                                                                                  |
| Complete List of Authors:       | Jung, Yoon-Sun; Korea University, Department of Public Health, Graduate School, Korea University, Seoul, Korea<br>Kim, Young-Eun ; National Health Insurance Service, Big Data Department, National Health Insurance Service, Wonju, Korea<br>Go, Dun-Sol; Korea Institute for Health and Social Affairs, Department of Health Care Policy Research, Korea Institute for Health and Social Affairs, Sejong, Korea<br>Yoon, Seok-Jun; Korea University, Department of Preventive Medicine, Korea University College of Medicine, Seoul, Korea |
| <b>Primary Subject Heading</b>: | Public health                                                                                                                                                                                                                                                                                                                                                                                                                                                                                                                                |
| Secondary Subject Heading:      | Health policy                                                                                                                                                                                                                                                                                                                                                                                                                                                                                                                                |
| Keywords:                       | PUBLIC HEALTH, Health policy < HEALTH SERVICES ADMINISTRATION & MANAGEMENT, PREVENTIVE MEDICINE                                                                                                                                                                                                                                                                                                                                                                                                                                              |
|                                 |                                                                                                                                                                                                                                                                                                                                                                                                                                                                                                                                              |

SCHOLARONE™  
Manuscripts



I, the Submitting Author has the right to grant and does grant on behalf of all authors of the Work (as defined in the below author licence), an exclusive licence and/or a non-exclusive licence for contributions from authors who are: i) UK Crown employees; ii) where BMJ has agreed a CC-BY licence shall apply, and/or iii) in accordance with the terms applicable for US Federal Government officers or employees acting as part of their official duties; on a worldwide, perpetual, irrevocable, royalty-free basis to BMJ Publishing Group Ltd ("BMJ") its licensees and where the relevant Journal is co-owned by BMJ to the co-owners of the Journal, to publish the Work in this journal and any other BMJ products and to exploit all rights, as set out in our [licence](#).

The Submitting Author accepts and understands that any supply made under these terms is made by BMJ to the Submitting Author unless you are acting as an employee on behalf of your employer or a postgraduate student of an affiliated institution which is paying any applicable article publishing charge ("APC") for Open Access articles. Where the Submitting Author wishes to make the Work available on an Open Access basis (and intends to pay the relevant APC), the terms of reuse of such Open Access shall be governed by a Creative Commons licence – details of these licences and which [Creative Commons](#) licence will apply to this Work are set out in our licence referred to above.

Other than as permitted in any relevant BMJ Author's Self Archiving Policies, I confirm this Work has not been accepted for publication elsewhere, is not being considered for publication elsewhere and does not duplicate material already published. I confirm all authors consent to publication of this Work and authorise the granting of this licence.

1 **Title: Projecting the prevalence of obesity in South Korea through 2040: a**  
2 **microsimulation modeling approach**

3  
4 **Authors:** Yoon-Sun Jung <sup>a\*</sup>, Young-Eun Kim<sup>b</sup>, Dun-Sol Go<sup>c</sup>, Seok-Jun Yoon<sup>d</sup>

5 **Affiliations:**

6 <sup>a</sup>Department of Public Health, Graduate School, Korea University, Seoul, Korea

7 <sup>b</sup>Big Data Department, National Health Insurance Service, Wonju, Korea

8 <sup>c</sup>Department of Health Care Policy Research, Korea Institute for Health and Social Affairs,  
9 Sejong, Korea

10 <sup>d</sup>Department of Preventive Medicine, Korea University College of Medicine, Seoul, Korea

11 **Corresponding author:**

12 Seok-Jun Yoon, M.D., Ph.D.

13 Department of Preventive Medicine, Korea University College of Medicine,  
14 73, Goryeodae-ro, Seongbuk-gu, Seoul, 02841, Korea

15 E-mail: yoonsj02@korea.ac.kr

16  
17 **E-mail addresses:**

18 sunnyauroa@nate.com (Yoon-Sun Jung)

19 kimyes4454@gmail.com (Young-Eun Kim)

20 kds237@gmail.com (Dun-Sol Go)

21  
22 **Keywords:** Microsimulation, body mass index, obesity, Population Health Model, South  
23 Korea

24  
25 **Word count:** 4,421

**ABSTRACT**

**Objective** To project the prevalence of obesity in 2040 among individuals 19 years and older in South Korea.

**Design, setting, and participants** Using the ‘Population Health Model-Body Mass Index’ (POHEM-BMI) microsimulation model, the prevalence of obesity in Korean adults 19 years and older was projected until 2040. The model integrated individual survey data from the Korea Health Panel Survey of 2011 and 2012, population statistics based on resident registration, population projections, and complete life tables categorized by sex and age. Birth rate, life expectancy, and international migration were based on a medium growth scenario. The base population of Korean adults in 2012, devised through data aggregation, was 39,842,730. The prediction equations were formulated using BMI as the dependent variable; the individual’s sex, age, smoking status, physical activity, and preceding year’s BMI were used as predictive factors.

**Outcome measure** BMI categorized by sex.

**Results** The median BMI for Korean adults in 2040 was expected to be 23.55 kg/m<sup>2</sup> (23.97 and 23.17 kg/m<sup>2</sup> for men and women, respectively). According to the Korean BMI classification, 70.05% of all adults were expected to be ‘pre-obese’ (i.e., have BMIs 23 to 24.9) by 2040 (81.23% of men and 59.07% of women) and 24.88% to be ‘normal’.

**Conclusions** We explored the possibility of applying and expanding on the concept of microsimulation in the field of healthcare by combining data sources available in Korea and found that more than half of the adults in this study population will be pre-obese, and the proportions of “obesity” and “normal” will decrease compared with those in 2012. The results of our study will aid in devising healthy strategies and spreading public awareness for preventing this condition.

1  
2  
3 514  
5 52**Strengths and limitations of this study**6  
7  
8 53

- To the best of our knowledge, this is the first study to use a microsimulation model to predict future obesity prevalence in Korea considering the change in population structure (macro level) as well as individual health behavior components (micro level).

9  
10 54  
11  
12 5513  
14 56

- The results of our study will be beneficial in suggesting additional and wider ranging goals for obesity prevention, by taking into consideration the influence of sex and age in the formulation of the ‘National Health Plan’.

15  
16 57  
17  
18 5819  
20 59

- Although a representative data source was used in this study, the prevalence of obesity may be underestimated because it is based on a self-reported BMI value.

21  
22 60  
23  
24 61

- This study uses a micro-simulation model developed abroad, and hence, may not reflect the domestic situations accurately.

25  
26 62  
27  
28 63

- Another limitation is that we assumed the attributes of 19-year-old individuals to remain similar each year.

29  
30 64  
31  
32 6533  
34 66  
35  
36  
37  
38  
39  
40  
41  
42  
43  
44  
45  
46  
47  
48  
49  
50  
51  
52  
53  
54  
55  
56  
57  
58  
59  
60



## 67 **BACKGROUND**

68 The prevalence of overweight and obesity has increased markedly over the past 3 decades,  
69 and concerns about health risks associated with obesity have become almost universal.[1]

70 The increasing rate of obesity is a growing public health concern not only in Western  
71 countries but also in South Korea.[2] From the 1990s through the beginning of the new  
72 millennium, the prevalence of adult and child obesity has increased rapidly and continues to  
73 rise steadily in parallel with rapid social and economic development.[3]

74 Obesity, a major public health problem and a factor in the development of many  
75 chronic diseases, constitutes a strain on individuals and health systems worldwide. The  
76 associated disorders of obesity include diabetes, hypertension, dyslipidemia, heart disease,  
77 stroke, sleep apnea, early death, and cancer.[4-8] Moreover, obesity among older people  
78 increases the risk of knee osteoarthritis[9] and reduces functional capacity and quality of  
79 life.[10-13] The prevalence of these conditions rises in proportion to the increase in  
80 obesity[14-17] and is associated with increased economic costs for both individuals and the  
81 society at large.[18] A study using the National Health Insurance Service data in Korea found  
82 that the socioeconomic cost of obesity in 2016 was approximately 9,665.32 million US  
83 Dollars.[19]

84 Meanwhile, with respect to worldwide comparisons, whether cutoff points for  
85 overweight and obesity should be lower for Asians than for another ethnic groups remains  
86 debatable.[20] The World Health Organization has proposed BMIs of 18.5–22.9, 23–24.9,  
87 25–29.9, and  $\geq 30$  kg/m<sup>2</sup> as optimal, overweight, moderate, and severe obesity for Asians,  
88 respectively.[21] The Korean Society of Obesity, which was established to improve obesity  
89 management through research and education, revised its clinical practical guidelines for the  
90 prevention and treatment of obesity in 2018. The new guidelines renamed the “overweight”  
91 category to "pre-obese", and divided obesity into 3 categories, to highlight the risk of obesity,

1  
2  
3 92 instead of promoting the term "overweight." The most recent guideline is based in part on  
4  
5 93 data of 84,690,131 Korean adults extracted from the Korean National Health Insurance  
6  
7 94 Service Health Checkup Database between 2006 and 2015. By including the entire  
8  
9 95 population registered in the National Health Insurance Service Database, they calculated the  
10  
11 96 first and second cutoff points corresponding to the increased risk of any of the 3  
12  
13 97 accompanying diseases (type 2 diabetes, hypertension, and dyslipidemia). The first (23  
14  
15 98 kg/m<sup>2</sup>) and second (25 kg/m<sup>2</sup>) cutoff BMI levels suggest the necessity of obesity criteria that  
16  
17 99 accurately reflect the risk of chronic disease among Koreans.[22,23]  
18  
19  
20

21  
22 100 Although numerous investigators in other countries have attempted to predict the  
23  
24 101 future prevalence of obesity, only one such study by Inkyung Baik was recently performed in  
25  
26 102 South Korea.[2] More recent trends still need to be investigated through predictive studies,  
27  
28 103 and the accurate prediction of obesity prevalence remains an important public health-related  
29  
30 104 goal in the country. To efficiently establish and execute an effective healthcare policy, which  
31  
32 105 would require a large budget, it is necessary to select future targets for policy interventions  
33  
34 106 (such as high-risk groups) to predict healthcare needs and prevent budget waste.  
35  
36

37 107 Past prediction models incorporated a country's entire population; as such,  
38  
39 108 macroscopic inferences based on average projections for the future society were generalized.  
40  
41 109 However, when establishing a healthcare policy, it is necessary to predict the future burden of  
42  
43 110 disease and medical needs of the entire population based on a real-world understanding of  
44  
45 111 individual-level factors that are influenced by policies or institutions. Individuals are  
46  
47 112 independent entities with different characteristics and needs, and health-related projections  
48  
49 113 can be modeled to reflect these individual characteristics, including health risk factors.[24] In  
50  
51 114 this regard, we aimed to predict the prevalence of obesity in Korea by using microsimulation,  
52  
53 115 which is optimal for considering individual properties.  
54  
55  
56

57  
58 116 Microsimulation, a modeling technique, typically uses individual microunits, each  
59  
60

1  
2  
3 117 with its own set of properties, to simulate downstream events based on the probability of  
4  
5 118 transition between predefined states and their changes over time. When used in medicine,  
6  
7 119 microsimulation can be particularly powerful because it preserves the patterns of previous  
8  
9 120 behaviors and conditions, and allows for a clearer representation and understanding of how  
10  
11 121 various processes affect the total outcome of the population over time.[25] Given macro-  
12  
13 122 effects such as changes in population structures in the forecasting model, microsimulation is  
14  
15 123 very useful as it can estimate both disease burdens and medical needs across the country.[24]  
16  
17 124 Microsimulation modeling is particularly useful for studying BMI trends because it can  
18  
19 125 simultaneously explain population dynamics such as aging and mortality.[26] However,  
20  
21 126 while microsimulation models have been steadily evolving across health- and economy-  
22  
23 127 related fields in many European countries,[27] they are yet to be actively utilized in South  
24  
25 128 Korea (especially for healthcare).

26  
27 129 Obesity prevalence and trend estimates provide important information for research,  
28  
29 130 policy, and intervention.[28] Because health forecasting predicts disease episodes and  
30  
31 131 portends future events, it facilitates healthcare strategies by promoting the setting of goals to  
32  
33 132 reduce obesity, establish health promotion interventions, and optimize resource  
34  
35 133 allocation.[29] Obesity trends may also be used to urge governments to implement  
36  
37 134 preventative approaches for reducing obesity.[30] Based on the above findings, we performed  
38  
39 135 this study to project the future trends in obesity prevalence in South Korea up to the year  
40  
41 136 2040.

42  
43  
44  
45  
46  
47  
48  
49 137

## 50 51 138 **METHODS**

### 52 53 139 **Model**

54  
55 140 We used the Population Health Model (POHEM)-BMI[26] to estimate the prevalence  
56  
57 141 of obesity among adults 19 years and older in South Korea from 2012 through 2040. In brief,  
58  
59  
60

1  
2  
3 142 POHEM is a time-continuous, population-based, dynamic microsimulation model with  
4  
5 143 individual underlying units of analysis used worldwide. Dynamic microsimulation, in the  
6  
7 144 context of social science and population health, is a simulation of individuals (i.e., micro-  
8  
9 145 level) and their behaviors, statuses, and actions (dynamics) over time.[31] These are modeled  
10  
11 146 as desired using multiple sources of empirical data, including cross-sectional surveys,  
12  
13 147 administrative databases, vital statistics, and census data.[32]  
14  
15 148 Through dynamic simulation, POHEM creates a population and ages it, one person at a time,  
16  
17 149 until death.[33] The model dynamically simulates an individual's disease state, risk factors,  
18  
19 150 and health determinants to describe and plan health outcomes.[32] POHEM is accessible  
20  
21 151 because it wants the general process to be constant across the country's population, with the  
22  
23 152 exception of variables unique to each country, such as marriage and mortality. The POHEM  
24  
25 153 models include cardiovascular disease, various cancers, osteoarthritis, physical activity, and  
26  
27 154 neurological events. The model used in this study was the POHEM-BMI; the performance of  
28  
29 155 each prediction step is shown in Figure 1.  
30  
31  
32  
33  
34

### 35 **Base population**

36  
37 157 To create the base population for the POHEM-BMI model, we used the 2011–2012 Korea  
38  
39 158 Health Panel survey[34] and the resident registration-based population statistics.[35] The  
40  
41 159 base population for POHEM-BMI (n=39,842,730), reflected the Korean population. Each  
42  
43 160 Korean respondent 19 years of age and older (n=11,501) in 2012 was replicated using their  
44  
45 161 survey-recorded weights to generate a simulated cohort of approximately 39,842,730  
46  
47 162 individuals. Korea Health Panel survey data are nationally representative, and incorporate  
48  
49 163 health status, chronic diseases, health risk behaviors, and socio-demographic characteristics.  
50  
51 164 Among them, we extracted sex, age, current smoking status, physical activity, and the  
52  
53 165 previous and current years' BMI values; these variables were required for the predictive  
54  
55 166 equation. We then used a multiple linear regression model to estimate the BMI value using  
56  
57  
58  
59  
60

1  
2  
3 167 the extracted independent variables as predictors. The POHEM-BMI model is auto-regressive  
4  
5 168 and includes previous BMI values as the main explanatory variable.[26] We matched the  
6  
7  
8 169 composition of the variables considered as covariates in the POHEM-BMI model. We did not  
9  
10 170 match the operational definition of the variables because we applied the Korea Health Panel  
11  
12 171 Survey data (not the survey data obtained in Canada where the POHEM model was  
13  
14 172 developed). The definitions of the variables in this study are consistent with the definitions of  
15  
16 173 the indicators in the Korea Health Statistics.[36] A current smoker was an individual who  
17  
18 174 reported smoking 'every day' or 'sometimes'. Practicing physical activity was defined as  
19  
20 175 performing either intense physical activity for at least 10 continuous minutes a day, 20  
21  
22 176 minutes total per day, 3 days a week during the preceding week, or moderate physical activity  
23  
24 177 for at least 30 minutes a day, 5 days a week during the preceding week. Height and weight,  
25  
26 178 which are components of BMI, were based on self-reported data.

### 179 **Simulation: Annual updates and risk transition**

180 The study population was updated by aging each person by 1 year and changing the total  
181 population size based on population statistics, population projections, and complete life tables  
182 categorized by sex and age from the Korean Statistics. For population projections, we  
183 assumed a medium growth scenario in terms of birth rate, life expectancy, and international  
184 migration. Each person's BMI was updated annually by applying a predictive equation that  
185 incorporates individual's own characteristics. The transition probability for each stochastic  
186 characteristic was calculated based on a generalized linear model.

187 We assumed that the current individual behavioral patterns persisted, and no new  
188 factors arose to prevent obesity, like in the original POHEM-BMI. We also assumed that the  
189 attributes of 19-year-old individuals, which were entered annually, remained similar each  
190 year. Therefore, in this model, since each individual's smoking status and physical activity in  
191 the initial population remained the same until 2040, the model predicted the BMI when the

192 adult smoking and physical activity rates in the initial year (2012) persisted until 2040.

### 193 **Model validation and calibration**

194 In order to establish the validity of the prediction model, we adjusted the model by  
195 comparing the 2013 to 2016 median BMIs projected from the model with the 2013 to 2016  
196 Korea Health Panel Survey median BMI estimates. We compared the median BMI values for  
197 each sex and age group from 2013 to 2016, and accepted a difference between the median  
198 BMI values in the prediction model and in the Korea Health Panel Survey to less than 5% by  
199 setting the calibration cutoff point to 5%. Finally, we adjusted the demographics of the 2040  
200 population so that the predictions were within the 5% margin of error. In this study, all the  
201 necessary data for model building and projection were obtained from publicly available data  
202 and do not include any identifiable personal information. Hence, no ethical approval was  
203 required in addition to the ethical and governance approvals granted by the Korea Institute for  
204 Health and Social Affairs (KIHASA), which conducts the Korea Health Panel Survey. All  
205 participants gave written informed consent before they completed the survey.

### 206 **Projection**

207 The model, validated through calibration, projected the BMI of each person from 2017 to  
208 2040. Based on the demographic characteristics, the projections were then aggregated by year  
209 for each of the predefined subgroups. The various trends observed in the Korean population  
210 data were used to generate algorithms that were applied to future projections.

### 211 **Model outputs**

212 The BMI distributions were calculated overall and by sex. Individuals with a BMI  $\geq 25$   
213 kg/m<sup>2</sup> were regarded as obese according to the Guidelines for the Management of Obesity in  
214 Korea, which is not the internationally accepted standard (Table 1). All analyses in this study  
215 were performed using STATA version 13 (StataCorp LLC, College Station, TX, USA).

216

217 **Table 1** BMI classification of South Korea

| Classification  | Body mass index<br>(kg/m <sup>2</sup> ) |
|-----------------|-----------------------------------------|
| Underweight     | < 18.5                                  |
| Normal          | 18.5 – 22.9                             |
| Pre-obese       | 23 – 24.9                               |
| Obese class I   | 25 – 29.9                               |
| Obese class II  | 30 – 34.9                               |
| Obese class III | ≥ 35                                    |

218

219 **Patient and public involvement**

220 No patient involved

221

222 **RESULTS**

223 We compared the total number of the individuals and their characteristics in the  
 224 initial 2012 population to those in the projected 2040 population (Table 2). There were  
 225 39,842,730 adults who were 19 years of age or older in 2012 and 43,818,808 in 2040. The  
 226 male: female ratio was nearly 1:1 in both 2012 and 2040. Rapid aging of the Korean  
 227 population was clearly observed when comparing the 2 populations. The mean age of adults  
 228 was expected to increase by 10.9 years (from 45.69 years in 2012 to 56.59 years in 2040  
 229 [from 44.57 to 55.54 years among men and 46.77 to 57.63 years among women]). In 2012,  
 230 the proportion of young people (those in the 19–39 and 40–64-year age groups combined)  
 231 accounted for approximately 85.54% of the adult population, while the proportion of

1  
2  
3 232 individuals aged 65 years and older was relatively low at approximately 14%. However, the  
4  
5 233 age group structure in South Korea 28 years later (2040) is predicted to be quite different, as  
6  
7 234 the proportion of individuals 19–64 years (i.e., the working age population) was only 60.95%  
8  
9  
10 235 of the adult population, while the proportion of the elderly population ( $\geq 65$  years) was  
11  
12  
13 236 estimated to be almost 40% of the total adult population. As of 2012, men and women  
14  
15 237 smoking rates were 45.05% and 2.24%, respectively, and physical activity rates were 15.41%  
16  
17 238 and 20.84%, respectively. In this study, only the BMI was updated annually by the predictive  
18  
19 239 equation, so the adult smoking rate and physical activity rate in 2040 are the same as in the  
20  
21 240 initial 2012 population.  
22  
23  
24  
25 241



242 **Table 2** Comparison of the number of people, South Korea, 2012 and 2040

|                    | <i>Population at baseline (2012)</i> |          |               |          |               |          | <i>Projected population (2040)</i> |          |               |          |               |          |
|--------------------|--------------------------------------|----------|---------------|----------|---------------|----------|------------------------------------|----------|---------------|----------|---------------|----------|
|                    | <b>Men</b>                           |          | <b>Women</b>  |          | <b>Total</b>  |          | <b>Men</b>                         |          | <b>Women</b>  |          | <b>Total</b>  |          |
|                    | <b>Number</b>                        | <b>%</b> | <b>Number</b> | <b>%</b> | <b>Number</b> | <b>%</b> | <b>Number</b>                      | <b>%</b> | <b>Number</b> | <b>%</b> | <b>Number</b> | <b>%</b> |
| Number of people   | 19,709,628                           |          | 20,133,102    |          | 39,842,730    |          | 21,717,128                         |          | 22,101,680    |          | 43,818,808    |          |
| Age (mean±s.d.)    | 44.57±15.60                          |          | 46.77±16.92   |          | 45.69±16.31   |          | 55.54±18.60                        |          | 57.63±19.33   |          | 56.59±19.00   |          |
| 19-39 years        | 7,985,737                            | 40.52%   | 7,505,824     | 37.29%   | 15,491,561    | 38.88%   | 4,873,740                          | 22.45%   | 4,588,867     | 20.76%   | 9,462,607     | 21.60%   |
| 40-64 years        | 9,360,489                            | 47.49%   | 9,230,871     | 45.85%   | 18,591,360    | 46.66%   | 8,896,886                          | 40.97%   | 8,349,634     | 37.78%   | 17,246,520    | 39.35%   |
| 65 years and above | 2,363,402                            | 11.98%   | 3,396,407     | 16.87%   | 5,759,809     | 14.45%   | 7,946,502                          | 36.59%   | 9,163,179     | 41.45%   | 17,109,681    | 39.05%   |
| Smoker             | 8,879,037                            | 45.05%   | 450,946       | 2.24%    | 9,329,983     | 23.42%   |                                    |          |               |          |               |          |
| Physical activity  | 5,199,273                            | 26.38%   | 3,103,036     | 15.41%   | 8,302,309     | 20.84%   |                                    |          |               |          |               |          |

243 s.d. standard deviation

244

1  
2  
3 245 The model was well calibrated to establish the validity. The difference in median  
4  
5 246 BMI between that estimated from the 2013 and 2016 Korea Health Panel survey and that  
6  
7 247 predicted by the 2013 and 2016 model was within the 5% range. Additionally, when  
8  
9 248 compared to the population structure for 2040 (the final year) as predicted by Statistics  
10  
11 249 Korea, the total population, gender, and age-specific ratio in the prediction model were  
12  
13 250 similar.  
14  
15

16  
17 251 Figure 2 shows the median BMI of the adult population from 2012 when the initial  
18  
19 252 population was generated to 2040, the final projected year. Each median BMI value from  
20  
21 253 2013 to 2016 was estimated from the Korea Health Panel survey, and the median BMI from  
22  
23 254 2017 to 2040 is the predicted value determined by the model. The median BMI for the entire  
24  
25 255 adult population is predicted to increase very slightly from 23.23 kg/m<sup>2</sup> in 2018 to 23.53  
26  
27 256 kg/m<sup>2</sup> in 2036 and is expected to remain steady thereafter. The predicted median BMI trends  
28  
29 257 are similar for men; the median BMI in adult men was projected to increase only slightly,  
30  
31 258 from 23.74 kg/m<sup>2</sup> in 2018 to 23.95 kg/m<sup>2</sup> in 2036 and then almost plateau thereafter.  
32  
33 259 However, women were expected to experience a relatively steep rise compared to that of  
34  
35 260 men; the median BMI in adult women was projected to increase from 22.66 kg/m<sup>2</sup> in 2018 to  
36  
37 261 23.17 kg/m<sup>2</sup> in 2040. The model in this study, used to predict the BMI of the population, did  
38  
39 262 not include any uncertainty parameters for the estimates.  
40  
41  
42  
43  
44  
45  
46

47 264 The BMI distributions for men and women from 2012 to 2040 are shown in Figure 3.  
48  
49 265 There was no significant difference between the median BMIs in 2012 and 2040, but the  
50  
51 266 results according to the BMI classifications showed large changes. The proportions of ‘pre-  
52  
53 267 obese’ individuals in both sexes are predicted to increase dramatically over time, while the  
54  
55 268 proportions of individuals who are classified as ‘normal’ and ‘obese’ will gradually decrease.  
56  
57 269 As of 2025, 52.35% of all male adults were expected to be pre-obese, with that proportion  
58  
59  
60

270 expected to be close to 81.23% by 2040. Moreover, 53.24% of all women were expected to  
 271 be 'pre-obese' by 2035, with the proportion rising to almost 59.07% by 2040.

272

273 According to the BMI classification by age group, in South Korea, in 2012, about  
 274 20.36% of the population aged 19-39 were 'pre-obese', but in 2040, it increased to 39.59%,  
 275 almost double. The proportion of the 'normal' population was almost the same in 2012 and  
 276 2040, and the 'obese class I' decreased by nearly half. However, in the population aged 40  
 277 to 64 and over 65, the proportion of 'pre-obese' increased almost three times in 2040  
 278 compared to that in 2012, and the proportion of 'normal' decreased to less than 20% (Table  
 279 3).

280

281 **Table 3** Comparison of the number of people according to the BMI classification by age group, South

282 Korea, 2012 and 2040

|                                              | <i>Population at baseline (2012)</i> |                    |                  | <i>Projected population (2040)</i> |                    |                  |
|----------------------------------------------|--------------------------------------|--------------------|------------------|------------------------------------|--------------------|------------------|
|                                              | <b>19-39 years</b>                   | <b>40-64 years</b> | <b>65- years</b> | <b>19-39 years</b>                 | <b>40-64 years</b> | <b>65- years</b> |
| Number of people                             | 15,491,561                           | 18,591,360         | 5,759,809        | 9,462,607                          | 17,246,520         | 17,109,681       |
| BMI (median)                                 | 22.37                                | 23.52              | 23.02            | 23.07                              | 23.64              | 23.58            |
| Distribution of people by BMI classification |                                      |                    |                  |                                    |                    |                  |
| Underweight %                                | 11.76                                | 5.10               | 7.60             | 2.66                               | 0.00               | 0.00             |
| Normal %                                     | 45.66                                | 37.81              | 42.12            | 45.68                              | 19.89              | 18.40            |
| Pre-obese %                                  | 20.36                                | 26.51              | 24.10            | 39.59                              | 76.60              | 80.31            |
| Obese class I %                              | 20.67                                | 28.40              | 24.85            | 11.70                              | 3.51               | 1.29             |
| Obese class II %                             | 1.51                                 | 1.79               | 1.30             | 0.36                               | 0.00               | 0.00             |
| Obese class III %                            | 0.03                                 | 0.38               | 0.02             | 0.02                               | 0.00               | 0.00             |

## 283 DISCUSSION

284 The purpose of this study was to predict the prevalence of obesity in South Korea in  
285 the year 2040 using a microsimulation model. In this study, we strove to predict future adult  
286 obesity rates in South Korea using the POHEM-BMI, which was developed by Statistics  
287 Canada. Summarizing the predicted results, the median BMI of South Korea's adult  
288 population aged 19 years and older was expected to be 23.55 in 2040, while the percentage of  
289 'pre-obese' individuals was expected to increase over time. While it is encouraging that the  
290 proportion of 'obese' people (i.e., those with BMIs  $\geq 25$  kg/m<sup>2</sup>) in 2040 is predicted to be  
291 much lower than that in 2012, it is discouraging that the proportion of 'normal' individuals is  
292 also markedly lower. Most notably, the pre-obesity rate is predicted to rise dramatically. In  
293 addition to the sex and age variables, our model includes only smoking and physical activity  
294 as health-related behaviors. It was assumed that the status of these health risk factors remain  
295 consistent from the initial population period to the final projected year of 2040; hence, our  
296 results showed that maintaining smoking and physical activity rates in 2012 among adults  
297 will lead to a sharp increase in the 'pre-obese' population by 2040.

298 To the best of our knowledge, the only other study that predicted future obesity rates  
299 among South Korean adults was the investigation by Baik.[2] That study explored factors  
300 affecting adult as well as abdominal obesity, and constructed forecasting models to predict  
301 obesity prevalence rates in 2020 and 2030 using the Korea National Health and Nutritional  
302 Examination Survey (KNHANES). The prevalence rates of obesity among men and women  
303 in that study were predicted to be 47% and 32%, respectively, in 2020 and 62% and 37%,  
304 respectively, in 2030; these data were inconsistent with our results. The differences in  
305 prediction results appeared to be caused by the different secondary sources and prediction  
306 models in the two studies. First, in Baik's study, a prediction model was constructed by  
307 applying a linear regression model and an autoregressive integrated moving average model

1  
2  
3 308 using the KNHANES data. The dependent variable in the prediction model was BMI, and the  
4  
5 309 independent variables included the survey year, age, marital status, job status, income status,  
6  
7 310 smoking, alcohol consumption, sleep duration, psychological factors, dietary intake, and  
8  
9 311 fertility rate. In contrast, in this study, the Korea Health Panel data was used as the data  
10  
11 312 source, and BMI was predicted by performing microsimulation with sex, age, smoking,  
12  
13 313 physical activity, and previous years' BMIs as independent variables. Therefore, the method  
14  
15 314 of measurement of the dependent variable, BMI differs between the studies; unlike the  
16  
17 315 KNHANES, which contains body-measured height and weight information, the Korea Health  
18  
19 316 Panel (although this is a representative data source) generates data based on self-reported by  
20  
21 317 respondents, which may underestimate obesity. Inevitably, the obesity rate in the initial  
22  
23 318 population according to the KNHANES tended to be higher; as such, a higher initial  
24  
25 319 prevalence rate would lead to a higher projection.[37]

30 320 We also tried to compare the results from this study with the predicted estimate by  
31  
32 321 country, but few studies have empirically predicted the prevalence of obesity in the future  
33  
34 322 using simulation models. One study compiled nationally-representative data from various  
35  
36 323 sources and predicted the future prevalence of overweight and obesity in Indian adults aged  
37  
38 324 20-69 years will reach 30.5% and 9.5% among men, 27.4% and 13.9% among women,  
39  
40 325 respectively, by 2040.[38] According to a study that estimated the prevalence of obesity in  
41  
42 326 the future through regression modeling, 42% of Americans were expected to be obese by  
43  
44 327 2030.[39] Similarly, a study that predicted the prevalence of obesity in Australian adults by  
45  
46 328 2025 using a multiple linear regression model predicted that 83% of male adults over the age  
47  
48 329 of 20 and 75% of female adults would be overweight or obese.[40] In all three countries,  
49  
50 330 India, the United States, and Australia, overweight and obesity were defined according to the  
51  
52 331 classifications defined by the WHO, and much higher values were found than those in Korea.  
53  
54 332 We also compared our results to those predicted in Canada using the same model, and 59% of  
55  
56  
57  
58  
59  
60

1  
2  
3 333 the adult Canadian population was predicted to be 'overweight or obese' by 2030.  
4

5 334 This study defined obesity by applying the BMI classification system according to  
6  
7 335 2018 Korean Society for the Study of Obesity guideline for the management of obesity in  
8  
9 336 Korea. It would be appropriate to use international standards for comparison; however, it is  
10  
11 337 necessary to reflect the situation of individual countries in the management of obesity for the  
12  
13 338 purpose of preventing and managing chronic diseases. Therefore, rather than emphasizing the  
14  
15 339 BMI classification criteria, more research is needed to determine the BMI values that can  
16  
17 340 significantly predict the occurrence of chronic diseases. In other words, it is necessary to  
18  
19 341 continuously accumulate sufficient epidemiologic evidence for the relationship between the  
20  
21 342 BMI and the actual risk of disease and death for Koreans, and based on such evidence, efforts  
22  
23 343 to establish appropriate diagnostic and medical standards for Koreans are needed. In  
24  
25 344 particular, the relationship is likely to vary by age and sex; hence, it should be considered too.  
26  
27 345 Here, the obesity standard has been applied collectively regardless of sex and age. However,  
28  
29 346 in order to deviate from a uniform approach to obesity, gender- and age-based approaches are  
30  
31 347 needed, considering the changes in hormones and body composition.  
32  
33  
34  
35  
36

37 348 Because health management policies including obesity management require a large  
38  
39 349 budget, it is most important to establish cost-effective policies. The results from this study  
40  
41 350 made it possible to determine the obese high-risk group by sex and age group, and to estimate  
42  
43 351 medical needs. As it is necessary to apply obesity standards differently according to sex and  
44  
45 352 age group, it is difficult to set the 'National Health Plan' [41] goals. This plan needs to  
46  
47 353 suggest additional, wider ranging goals considering the characteristics of each sex and age  
48  
49 354 group, rather than presenting goals for obesity prevalence among adult men and women. In  
50  
51 355 this case, the goal should be presented at an achievable level in consideration of future  
52  
53 356 prediction patterns. Finally, systematic public health interventions, which are tailored to  
54  
55 357 individual characteristics need to be established.  
56  
57  
58  
59  
60

1  
2  
3 358 Findings from this study should be interpreted with consideration to several limitations. First,  
4  
5 359 since a microsimulation model for predicting obesity prevalence has not been developed in  
6  
7 360 South Korea, we adapted the model developed by Statistics Canada, and this may not fit our  
8  
9 361 domestic situation. If the BMI predictors are suitable for our domestic situation, that is, if  
10  
11 362 variables that are important for predicting BMI of Koreans are constructed through empirical  
12  
13 363 analysis or literature review, the composition of the covariates may be different from that of  
14  
15 364 the existing POHEM-BMI model. However, in this study, since we explored the possibility of  
16  
17 365 a domestic application of the model and carefully adapted the existing model, the process of  
18  
19 366 constructing a prediction equation was omitted. In the future, research to develop a new  
20  
21 367 model of microsimulation in the field of healthcare for domestic conditions will be very  
22  
23 368 valuable. In this process, it is necessary to consider practical suitability and efficiency in  
24  
25 369 selecting basic data, module-specific behavioral equations, and variables for use in the model.  
26  
27 370 Second, we had limited data sources. The prevalence of obesity calculated in this study is  
28  
29 371 different from that of the Korea Health Statistics using the KNHANES, and as of 2011, the  
30  
31 372 prevalence of adult obesity in the Korea Health Statistics was 8.2% higher than that of the  
32  
33 373 Korea Health Panel Survey.[42] Although the method of measuring BMI in KNHANES is  
34  
35 374 more accurate, in the POHEM-BMI model used in this study, the BMI of the previous year  
36  
37 375 was regarded as the main explanatory variable, and therefore, the Korea Health panel data  
38  
39 376 that followed-up the same participants once a year was inevitably used. In addition, the  
40  
41 377 original POHEM-BMI model includes the process of converting self-reported BMI into a  
42  
43 378 measured BMI, but we omitted this due to limitations of the data source. Third, we assumed  
44  
45 379 that the attributes of 19-year-old individuals entered each year remain at a similar level each  
46  
47 380 year. This means that the individual attributes of 19-year-old adults are the same for 29 years  
48  
49 381 from 2012 to 2040; thus, it can be considered somewhat less realistic. In future studies, it is  
50  
51 382 expected that more meaningful and realistic results will be derived if the model is constructed  
52  
53  
54  
55  
56  
57  
58  
59  
60

383 by reflecting the trend of changes in the attributes of the 19-year-old population and updating  
384 it according to the year.

385 Nevertheless, our study is the first to examine the possibility of using  
386 microsimulation to predict future BMI medians in South Korea. Additionally, the BMI of the  
387 future adult population was predicted after considering the change in population structure at  
388 the macro level as well as individual health behavior components at the micro level.

389

## 390 **CONCLUSION**

391 The key finding of this study is that by 2040, 70.05% of Korean adults are predicted  
392 to be pre-obese. Utilizing data sources available in Korea, the possibility of applying and  
393 expanding on the concept of microsimulation was explored. In future studies, a model  
394 suitable for South Korea needs to be developed, and the effectiveness of specific health  
395 policies ought to be assessed by applying various relevant scenarios to the basic forecasting  
396 model.

397

## 398 **Abbreviations**

399 BMI: body mass index; KNHANES: Korea National Health and Nutritional  
400 Examination Survey, POHEM: Population Health Model; s.d. standard deviation

## 401 **Authors' contributions**

402 YS (the first author) designed the study, analyzed, and interpreted the data, and wrote  
403 the paper. YE participated in the statistical analysis. DS aided in the interpretation of the data  
404 and preparation of the manuscript. SJ (the corresponding author) directed this study. All  
405 authors read and approved the final version of the manuscript.

## 406 **Funding**

407 This work was supported by the National Research Foundation of Korea (NRF) grant



1  
2  
3 408 funded by the Korea government (Ministry of Science and ICT) (No. 2017R1A2B4005876).  
4

5 409 The funding agency had no role in the study design, analysis and interpretation of the data, or  
6  
7  
8 410 the preparation of the manuscript.  
9

#### 10 411 **Competing Interests**

11  
12 412 The authors declare that they have no competing interests.  
13

#### 14 413 **Ethics approval**

15  
16  
17 414 This study used publicly available data of Korea Health Panel Survey 2011-2012  
18  
19 415 from the Korea Institute for Health and Social Affairs and the National Health Insurance,  
20  
21 416 population statistics based on resident registration, population projections, complete life  
22  
23 417 tables and future mortality rates from Statistics Korea. The dataset does not contain any  
24  
25 418 identifiable personal information. Ethical approval was given by the Institutional Review  
26  
27 419 Board of Korea University, Seoul, Korea (IRB No. KUIRB-2020-0018-01).  
28  
29

#### 30 420 **Data sharing statement**

31  
32  
33 421 The Korea Health Panel Survey data used in this article is available in  
34  
35 422 <https://www.khp.re.kr:444/eng/data/data.do>. Detailed information on the survey design and  
36  
37 423 data characteristics are provided at <https://www.khp.re.kr:444/eng/survey/sampling.do>.  
38  
39 424 Population statistics, population projections, and complete life tables are available from  
40  
41 425 <http://kosis.kr/eng/>.  
42  
43  
44  
45  
46  
47  
48  
49  
50  
51  
52  
53  
54  
55  
56  
57  
58  
59  
60

428 **REFERENCES**

429

- 430 1. Ng M, Fleming T, Robinson M, et al. Global, regional, and national prevalence of  
431 overweight and obesity in children and adults during 1980-2013: a systematic analysis for  
432 the Global Burden of Disease Study 2013. *Lancet* 2014;384:766–81.  
433 [https://doi.org/10.1016/S0140-6736\(14\)60460-8](https://doi.org/10.1016/S0140-6736(14)60460-8)
- 434 2. Baik I. Forecasting obesity prevalence in Korean adults for the years 2020 and 2030 by the  
435 analysis of contributing factors. *Nutr Res Pract* 2018;12:25–7.  
436 <https://dx.doi.org/10.4162/nrp.2018.12.3.251>
- 437 3. Kim D, Ahn C, Nam SY. Prevalence of obesity in Korea. *Obesity Rev* 2005;6:117–21.  
438 <https://doi.org/10.1111/j.1467-789X.2005.00173.x>
- 439 4. Okosun IS, Chandra KMD, Choi S, et al. Hypertension and type 2 diabetes comorbidity in  
440 adults in the United States: Risk of overall and regional adiposity. *Obes Res* 2001;9:1–9.  
441 <https://doi.org/10.1038/oby.2001.1>
- 442 5. Krauss RM, Winston M, Fletcher BJ, et al. Obesity: impact on cardiovascular disease.  
443 *Circulation* 1998;98:1472–6.
- 444 6. Chin K, Ohi M. Obesity and obstructive sleep apnea syndrome. *Intern Med* 1999;38:200–  
445 2. <https://doi.org/10.2169/internalmedicine.38.200>
- 446 7. Wallström P, Bjartell A, Gullberg B, et al. A prospective Swedish study on body size, body  
447 composition, diabetes, and prostate cancer risk. *Brit J Cancer* 2009;100:1799–805.  
448 <https://doi.org/10.1038/sj.bjc.6605077>
- 449 8. Guh DP, Zhang W, Bansback N, et al. The incidence of comorbidities related to obesity  
450 and overweight: a systematic review and meta-analysis. *BMC Public Health* 2009;9:88.  
451 <https://doi.org/10.1186/1471-2458-9-88>
- 452 9. Coggon D, Reading I, Croft P, et al. Knee osteoarthritis and obesity. *Int J Obes Relat*

- 1  
2  
3 453 *Metab Disord* 2001;25:622–7. <https://doi.org/10.1038/sj.ijo.0801585>
- 4  
5 454 10. Stenholm S, Rantanen T, Alanen E, et al. Obesity history as a predictor of walking  
6  
7 455 limitation at old age. *Obesity* 2007;15:929–38. <https://doi.org/10.1038/oby.2007.583>
- 8  
9 456 11. Alley DE, Chang VW. The changing relationship of obesity and disability, 1988–2004.  
10  
11 457 *JAMA* 2007;298:2020–7. <https://doi.org/10.1001/jama.298.17.2020>
- 12  
13 458 12. Larsson U, Karlsson J, Sullivan M. Impact of overweight and obesity on health-related  
14  
15 459 quality of life—a Swedish population study. *Int J Obes Relat Metab Disord* 2002;26:417–24.  
16  
17 460 <https://doi.org/10.1038/sj.ijo.0801919>
- 18  
19 461 13. Zaninotto P, Pierce M, Breeze E, et al. BMI and waist circumference as predictors of  
20  
21 462 well-being in older adults: findings from the English Longitudinal Study of Ageing. *Obesity*  
22  
23 463 2010;18:1981–7. <https://doi.org/10.1038/oby.2009.497>
- 24  
25 464 14. Emerging Risk Factors Collaboration, Wormser D, Kaptoge S, et al. Separate and  
26  
27 465 combined associations of body-mass index and abdominal adiposity with cardiovascular  
28  
29 466 disease: Collaborative analysis of 58 prospective studies. *Lancet* 2011;377:1085–95.  
30  
31 467 [https://doi.org/10.1016/S0140-6736\(11\)60105-0](https://doi.org/10.1016/S0140-6736(11)60105-0)
- 32  
33 468 15. The Global Burden of Metabolic Risk Factors for Chronic Diseases Collaboration (BMI  
34  
35 469 Mediated Effects), Lu Y, Hajifathalian K, et al. Metabolic mediators of the effects of body-  
36  
37 470 mass index, overweight, and obesity on coronary heart disease and stroke: A pooled  
38  
39 471 analysis of 97 prospective cohorts with 1.8 million participants. *Lancet* 2014;383:970–83.  
40  
41 472 [https://doi.org/10.1016/S0140-6736\(13\)61836-X](https://doi.org/10.1016/S0140-6736(13)61836-X)
- 42  
43 473 16. Renehan AG, Tyson M, Egger M, et al. Body-mass index and incidence of cancer: A  
44  
45 474 systematic review and meta-analysis of prospective observational studies. *Lancet*  
46  
47 475 2008;371:569–78. [https://doi.org/10.1016/S0140-6736\(08\)60269-X](https://doi.org/10.1016/S0140-6736(08)60269-X)
- 48  
49 476 17. Bhimjiyani A, Knuchel-Takano A, Hunt D, et al. Tipping the scales: Why preventing  
50  
51 477 obesity makes economic sense. Technical Report 2016.  
52  
53  
54  
55  
56  
57  
58  
59  
60

- 1  
2  
3 478 [https://www.cancerresearchuk.org/sites/default/files/tipping\\_the\\_scales\\_-](https://www.cancerresearchuk.org/sites/default/files/tipping_the_scales_-_cruk_full_report11.pdf)  
4  
5 479 [cruk\\_full\\_report11.pdf](https://www.cancerresearchuk.org/sites/default/files/tipping_the_scales_-_cruk_full_report11.pdf) (accessed 26 Jan 2020).  
6  
7  
8 480 18. Wang YC, McPherson K, Marsh T, et al. Health and economic burden of the projected  
9 obesity trends in the USA and the UK. *Lancet* 2011;378:815–25.  
10 481  
11  
12 482 [https://doi.org/10.1016/S0140-6736\(11\)60814-3](https://doi.org/10.1016/S0140-6736(11)60814-3)  
13  
14 483 19. Lee M. Half of the socioeconomic costs of obesity are ‘medical costs’. Korea Biomedical  
15 Review (2018, December 10).  
16 484  
17 485 <http://www.docdocdoc.co.kr/news/articleView.html?idxno=1063317/> (accessed 29 Jan  
18 2020)  
19 486  
20  
21 487 20. Low S, Chin MC, Ma S, et al. Rationale for redefining obesity in Asians. *Ann Acad Med*  
22 *Singapore* 2009;38:66–9.  
23 488  
24 489 21. The World Health Organization Western Pacific Region, International Association for the  
25 Study of Obesity. The Asia-Pacific Perspective: Redefining obesity and its treatment.  
26 Sydney, Australia: Health Communications Australia Pty Limited; 2000.  
27 490  
28 491  
29 492 22. Seo MH, Kim YH, Han K, et al. Prevalence of obesity and incidence of obesity-related  
30 comorbidities in Koreans based on National Health Insurance Service Health Checkup Data  
31 2006-2015 (*J Obes Metab Syndr* 2018;27:46–52). *J Obes Metab Syndr* 2018;27:198–9.  
32 493  
33 494 <https://doi.org/10.7570/jomes.2018.27.3.198>  
34 495  
35 496 23. Seo MH, Lee WY, Kim SS, et al. 2018 Korean Society for the Study of Obesity guideline  
36 for the management of obesity in Korea. *J Obes Metab Syndr* 2019;28:40–5.  
37 497  
38 498 <https://doi.org/10.7570/jomes.2019.28.1.40>  
39 499  
40 500 24. Kim D. Estimation of disease and disease burden by health behavior. Sejong City: Korea  
41 Institute for Health and Social Affairs 2018.  
42 501  
43 502 25. Çağlayan Ç, Terawaki H, Chen Q, et al. Microsimulation Modeling in Oncology. *JCO*  
44 *Clin Cancer Inform* 2018;2:1–11. <https://doi.org/10.1200/CCI.17.00029>  
45  
46  
47  
48  
49  
50  
51  
52  
53  
54  
55  
56  
57  
58  
59  
60

- 1  
2  
3 503 26. Hennessy D, Garner R, Flanagan WM, et al. Development of a population-based  
4  
5 504 microsimulation model of body mass index. *Health Rep* 2017;28:20–30.  
6  
7  
8 505 27. Spielauer M. Dynamic microsimulation of health care demand, health care finance and  
9  
10 506 the economic impact of health behaviours: survey and review. 2007 *International Journal*  
11  
12 507 *of Microsimulation* 2007;1:35–53.  
13  
14  
15 508 28. The National Academies of Sciences, Engineering, and Medicine. Assessing prevalence  
16  
17 509 and trends in obesity: Navigating the evidence. Washington DC: The National Academies  
18  
19 510 Press 2016.  
20  
21  
22 511 29. Soyiri IN, Reidpath DD. An overview of health forecasting. *Environ Health Prev Med*  
23  
24 512 2013;18:1–9. <https://doi.org/10.1007/s12199-012-0294-6>  
25  
26 513 30. Pineda E, Sanchez-Romero LM, Brown M, et al. Forecasting future trends in obesity  
27  
28 514 across Europe: The value of improving surveillance. *Obes Facts* 2018;11:360–71.  
29  
30 515 <https://doi.org/10.1159/000492115>  
31  
32  
33 516 31. Zucchelli E, Jones A, Rice N. The evaluation of health policies through dynamic  
34  
35 517 microsimulation methods. *International Journal of Microsimulation* 2012;5:2–20.  
36  
37  
38 518 32. Hennessy DA, Flanagan WM, Tanuseputro P, et al. The Population Health Model  
39  
40 519 (POHEM): an overview of rationale, methods and applications. *Popul Health Metrics*  
41  
42 520 2015;13:24. <https://doi.org/10.1186/s12963-015-0057-x>  
43  
44  
45 521 33. Manuel DG, Tuna M, Hennessy D, et al. Projections of preventable risks for  
46  
47 522 cardiovascular disease in Canada to 2021: a microsimulation modelling approach. *CMAJ*  
48  
49 523 *Open* 2014;2:E94–101. <https://doi.org/10.9778/cmajo.2012-0015>  
50  
51  
52 524 34. Korea Health Panel Study. <https://www.khp.re.kr:444/eng/main.do> (accessed 30 Nov  
53  
54 525 2020).  
55  
56 526 35. KOREAN Statistical Information Service. <https://kosis.kr/eng/> (accessed 30 Nov 2020).  
57  
58  
59 527 36. Korea National Health and Nutrition Examination Survey.  
60

- 1  
2  
3 528 <https://knhanes.cdc.go.kr/knhanes/eng/index.do> (accessed 30 Nov 2020).  
4  
5  
6 529 37. Lin J, Thompson TJ, Cheng YJ, et al. Projection of the future diabetes burden in the  
7  
8 530 United States through 2060. *Popul Health Metr* 2018;16:9. [https://doi.org/10.1186/s12963-](https://doi.org/10.1186/s12963-018-0166-4)  
9  
10 531 018-0166-4  
11  
12 532 38. Luhar S, Timæus IM, Jones R, et al. Forecasting the prevalence of overweight and obesity  
13  
14 533 in India to 2040. *PloS One* 2020;15:e0229438.  
15  
16  
17 534 39. Finkelstein EA, Khavjou OA, Thompson H, et al. Obesity and severe obesity forecasts  
18  
19 535 through 2030. *Am J Prev Med* 2012;42:563–70.  
20  
21  
22 536 40. Haby MM, Markwick A, Peeters A, et al. Future predictions of body mass index and  
23  
24 537 overweight prevalence in Australia, 2005–2025. *Health Promot Int* 2012;27:250–60.  
25  
26  
27 538 41. Ministry of Health and Welfare. National Health Plan 2020.  
28  
29 539 <https://www.mindbank.info/item/4070> (accessed 26 Nov 2020).  
30  
31 540 42. Choi JS, Choi SE, Yeom AR, et al. A Report on the Korea Health Panel Survey of 2011.  
32  
33 541 Korea Institute for Health and Affairs. 2013.  
34  
35  
36  
37  
38  
39  
40  
41  
42  
43  
44  
45  
46  
47  
48  
49  
50  
51  
52  
53  
54  
55  
56  
57  
58  
59  
60

1  
2  
3 542 **Figure legends**  
4

5 543 **Figure 1** Summary of the data sources and methods used to generate and validate the  
6  
7  
8 544 projections of the distribution of BMI categories in South Korea, 2012–2040  
9

10 545 **Figure 2** Population Health Model (POHEM) projections of median BMI in South Korea,  
11  
12 546 2012–2040  
13

14 547 **Figure 3A** Projection of the distribution of BMI, adults aged 19 years and older, South  
15  
16  
17 548 Korea, 2012–2040  
18

19 549 **Figure 3B** Projection of the distribution of BMI, men aged 19 years and older, South Korea,  
20  
21 550 2012–2040  
22

23  
24 551 **Figure 3C** Projection of the distribution of BMI, women aged 19 years and older, South  
25  
26 552 Korea, 2012–2040  
27

28 553  
29  
30  
31  
32  
33  
34  
35  
36  
37  
38  
39  
40  
41  
42  
43  
44  
45  
46  
47  
48  
49  
50  
51  
52  
53  
54  
55  
56  
57  
58  
59  
60

BMI categories in South Korea, 2012-2040

1  
2  
3  
4  
5  
6  
7  
8  
9  
10  
11  
12  
13  
14  
15  
16  
17  
18  
19  
20  
21  
22  
23  
24  
25  
26  
27  
28  
29  
30  
31  
32  
33  
34  
35  
36  
37  
38  
39  
40  
41

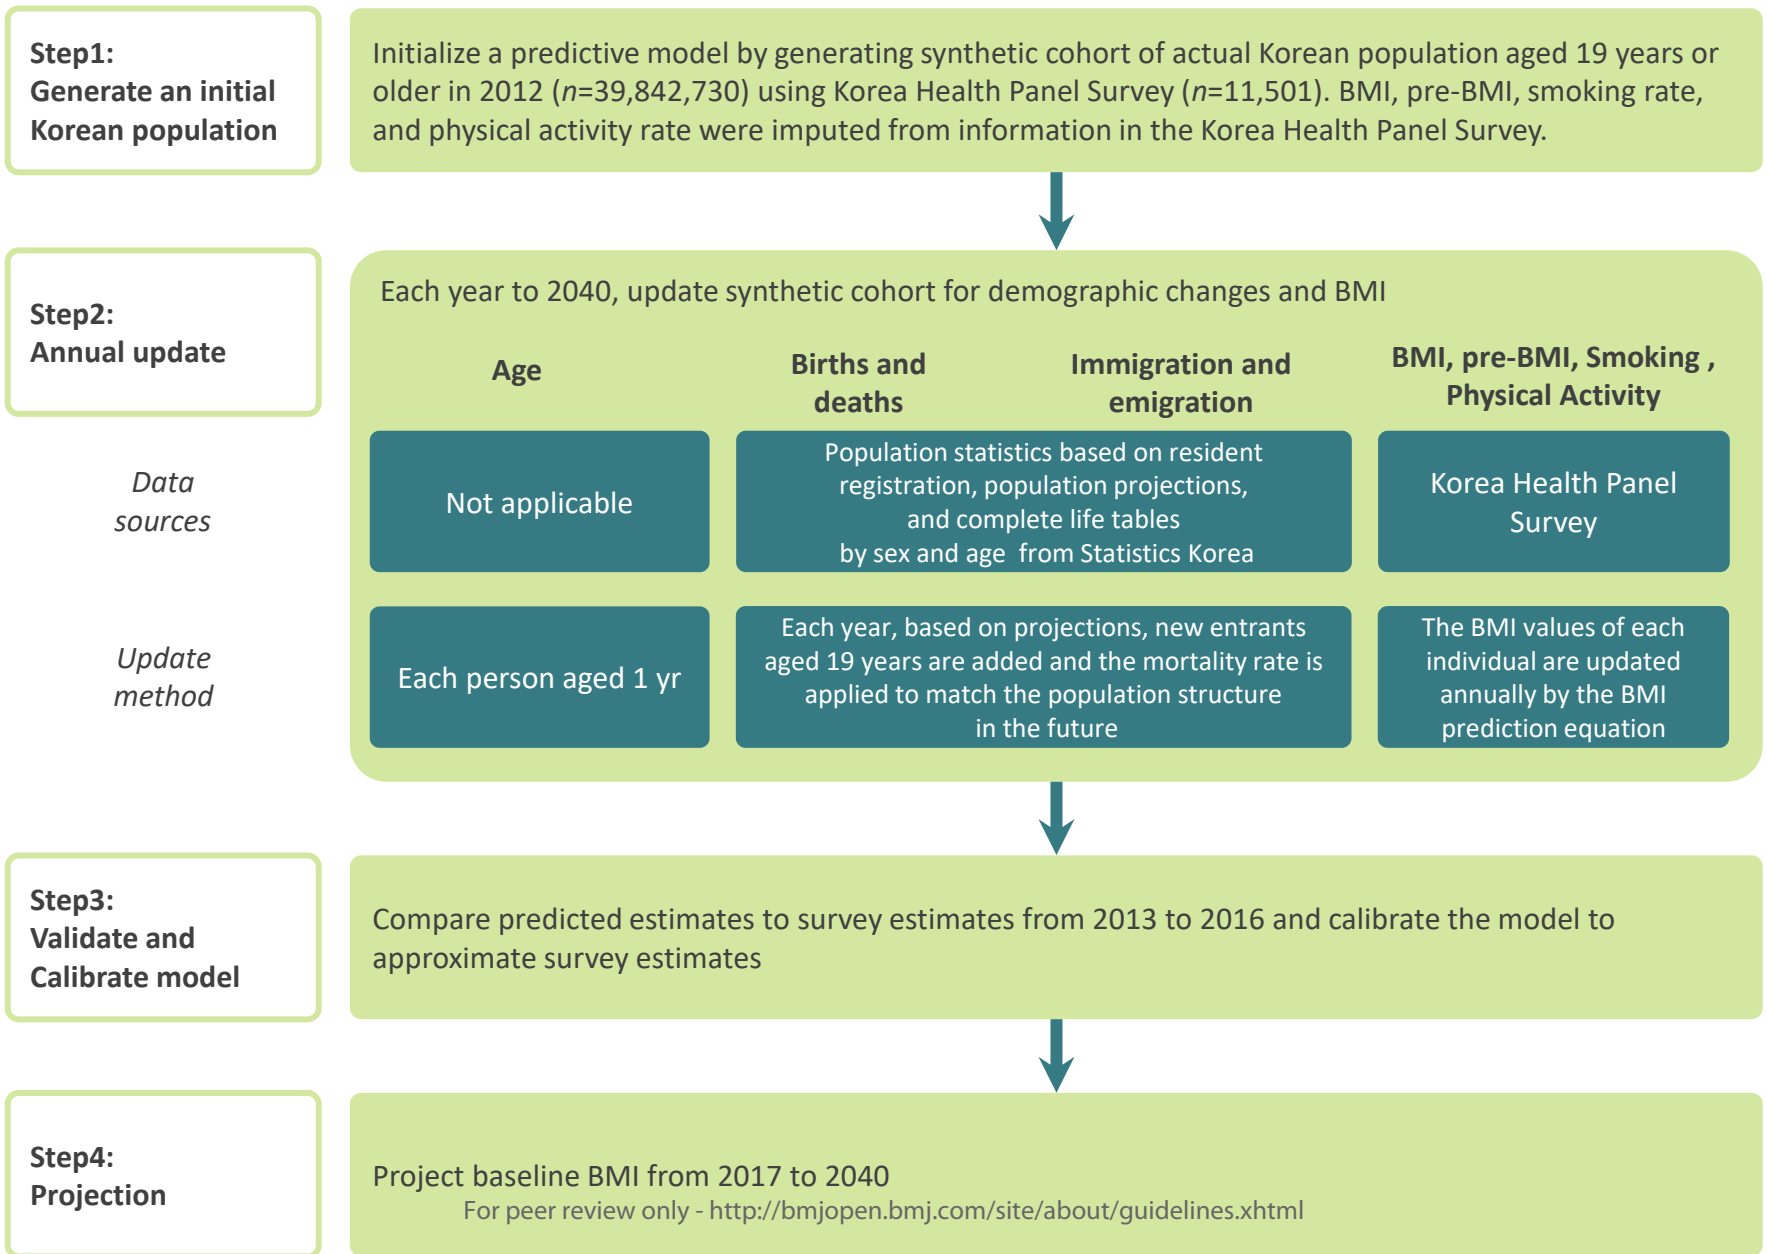



Figure 2 Population Health Model (POHEM) projections of Median BMI in South Korea, 2012-2040

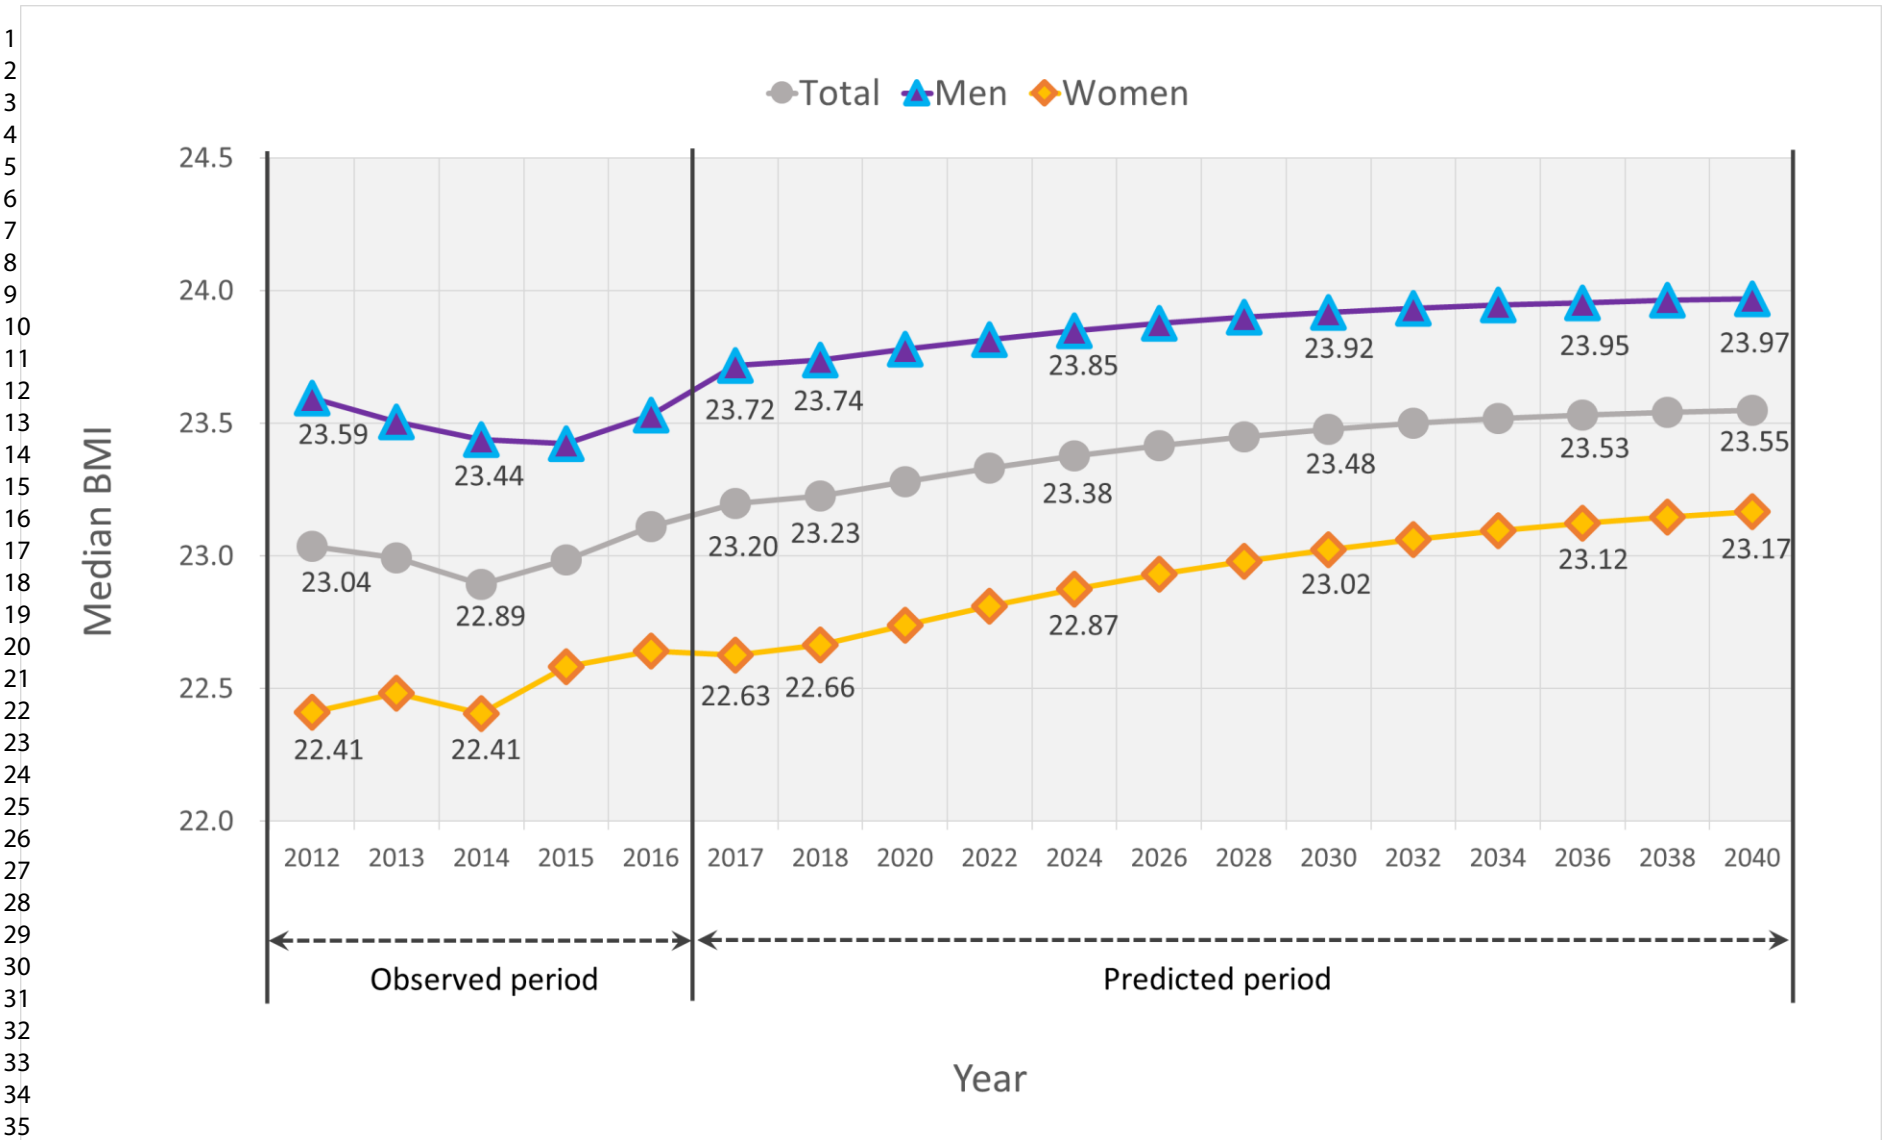

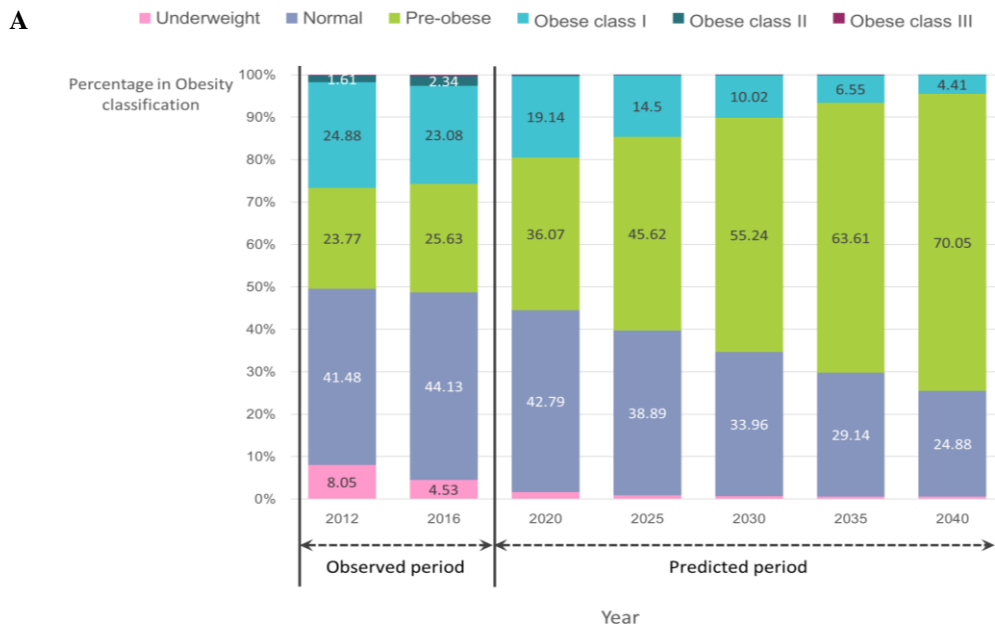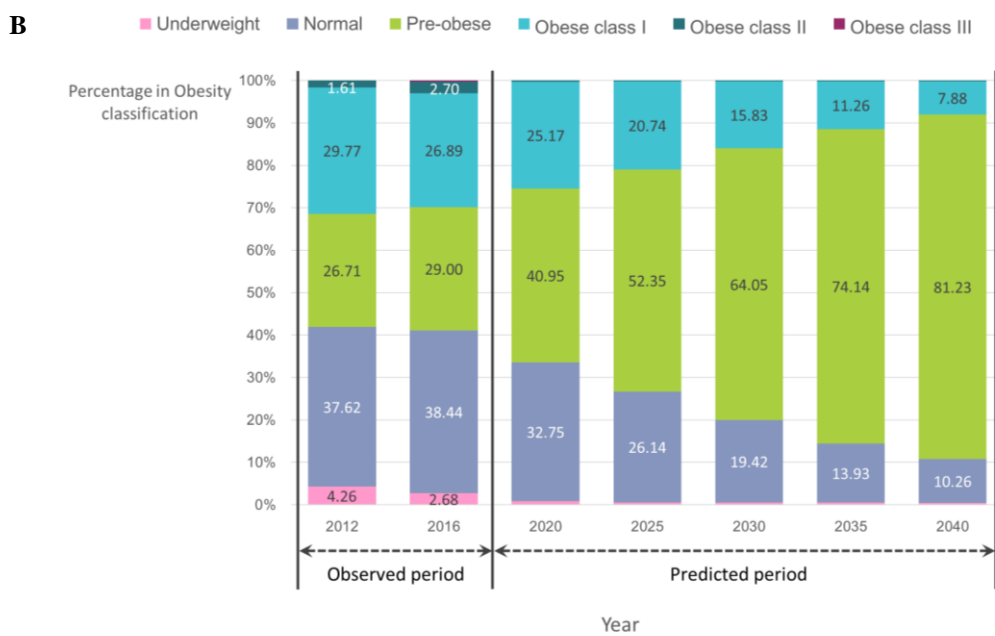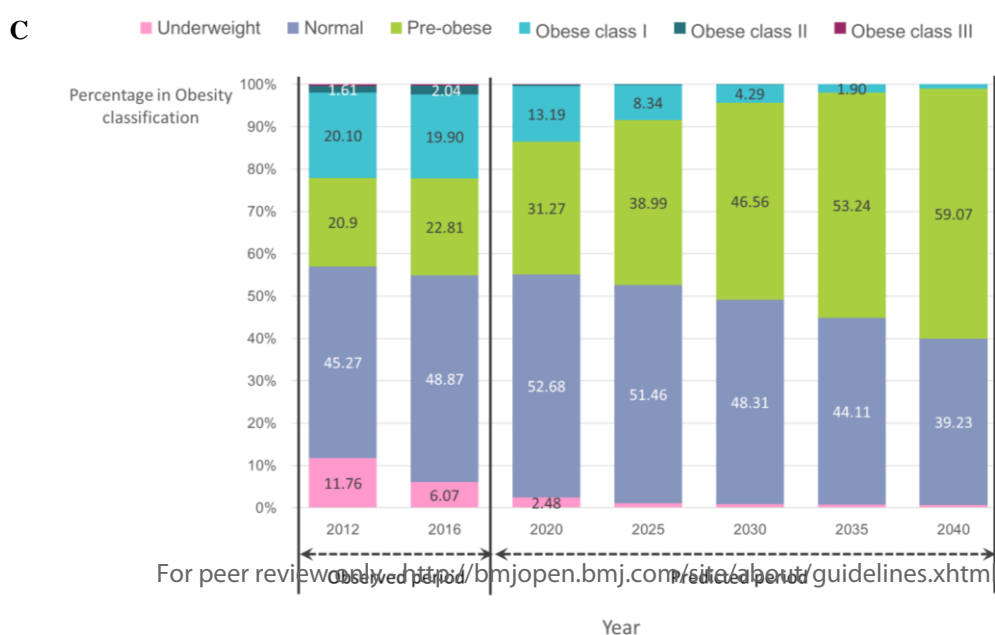

## STROBE Statement—checklist of items that should be included in reports of observational studies

|                              | Item No | Recommendation                                                                                                                                                                                                                                                                                                                                                                                                                                                         | Page No |
|------------------------------|---------|------------------------------------------------------------------------------------------------------------------------------------------------------------------------------------------------------------------------------------------------------------------------------------------------------------------------------------------------------------------------------------------------------------------------------------------------------------------------|---------|
| <b>Title and abstract</b>    | 1       | (a) Indicate the study's design with a commonly used term in the title or the abstract                                                                                                                                                                                                                                                                                                                                                                                 | 1-2     |
|                              |         | (b) Provide in the abstract an informative and balanced summary of what was done and what was found                                                                                                                                                                                                                                                                                                                                                                    | 2       |
| <b>Introduction</b>          |         |                                                                                                                                                                                                                                                                                                                                                                                                                                                                        |         |
| Background/rationale         | 2       | Explain the scientific background and rationale for the investigation being reported                                                                                                                                                                                                                                                                                                                                                                                   | 4-6     |
| Objectives                   | 3       | State specific objectives, including any prespecified hypotheses                                                                                                                                                                                                                                                                                                                                                                                                       | 6       |
| <b>Methods</b>               |         |                                                                                                                                                                                                                                                                                                                                                                                                                                                                        |         |
| Study design                 | 4       | Present key elements of study design early in the paper                                                                                                                                                                                                                                                                                                                                                                                                                | 7       |
| Setting                      | 5       | Describe the setting, locations, and relevant dates, including periods of recruitment, exposure, follow-up, and data collection                                                                                                                                                                                                                                                                                                                                        | 7-8     |
| Participants                 | 6       | (a) <i>Cohort study</i> —Give the eligibility criteria, and the sources and methods of selection of participants. Describe methods of follow-up<br><i>Case-control study</i> —Give the eligibility criteria, and the sources and methods of case ascertainment and control selection. Give the rationale for the choice of cases and controls<br><i>Cross-sectional study</i> —Give the eligibility criteria, and the sources and methods of selection of participants | 8-9     |
|                              |         | (b) <i>Cohort study</i> —For matched studies, give matching criteria and number of exposed and unexposed<br><i>Case-control study</i> —For matched studies, give matching criteria and the number of controls per case                                                                                                                                                                                                                                                 | -       |
| Variables                    | 7       | Clearly define all outcomes, exposures, predictors, potential confounders, and effect modifiers. Give diagnostic criteria, if applicable                                                                                                                                                                                                                                                                                                                               | 7-9     |
| Data sources/<br>measurement | 8*      | For each variable of interest, give sources of data and details of methods of assessment (measurement). Describe comparability of assessment methods if there is more than one group                                                                                                                                                                                                                                                                                   | 7-9     |
| Bias                         | 9       | Describe any efforts to address potential sources of bias                                                                                                                                                                                                                                                                                                                                                                                                              | 9       |
| Study size                   | 10      | Explain how the study size was arrived at                                                                                                                                                                                                                                                                                                                                                                                                                              | 7       |
| Quantitative variables       | 11      | Explain how quantitative variables were handled in the analyses. If applicable, describe which groupings were chosen and why                                                                                                                                                                                                                                                                                                                                           | 7-8     |
| Statistical methods          | 12      | (a) Describe all statistical methods, including those used to control for confounding                                                                                                                                                                                                                                                                                                                                                                                  | 7-9     |
|                              |         | (b) Describe any methods used to examine subgroups and interactions                                                                                                                                                                                                                                                                                                                                                                                                    | -       |
|                              |         | (c) Explain how missing data were addressed                                                                                                                                                                                                                                                                                                                                                                                                                            | -       |
|                              |         | (d) <i>Cohort study</i> —If applicable, explain how loss to follow-up was addressed<br><i>Case-control study</i> —If applicable, explain how matching of cases and controls was addressed<br><i>Cross-sectional study</i> —If applicable, describe analytical methods taking account of sampling strategy                                                                                                                                                              | 9       |
|                              |         | (e) Describe any sensitivity analyses                                                                                                                                                                                                                                                                                                                                                                                                                                  | -       |

Continued on next page

| <b>Results</b>           |     |                                                                                                                                                                                                              |       |
|--------------------------|-----|--------------------------------------------------------------------------------------------------------------------------------------------------------------------------------------------------------------|-------|
| Participants             | 13* | (a) Report numbers of individuals at each stage of study—eg numbers potentially eligible, examined for eligibility, confirmed eligible, included in the study, completing follow-up, and analysed            | 10    |
|                          |     | (b) Give reasons for non-participation at each stage                                                                                                                                                         | -     |
|                          |     | (c) Consider use of a flow diagram                                                                                                                                                                           | -     |
| Descriptive data         | 14* | (a) Give characteristics of study participants (eg demographic, clinical, social) and information on exposures and potential confounders                                                                     | 10-13 |
|                          |     | (b) Indicate number of participants with missing data for each variable of interest                                                                                                                          | 14    |
|                          |     | (c) <i>Cohort study</i> —Summarise follow-up time (eg, average and total amount)                                                                                                                             | 10-11 |
| Outcome data             | 15* | <i>Cohort study</i> —Report numbers of outcome events or summary measures over time                                                                                                                          | 14    |
|                          |     | <i>Case-control study</i> —Report numbers in each exposure category, or summary measures of exposure                                                                                                         | -     |
|                          |     | <i>Cross-sectional study</i> —Report numbers of outcome events or summary measures                                                                                                                           | -     |
| Main results             | 16  | (a) Give unadjusted estimates and, if applicable, confounder-adjusted estimates and their precision (eg, 95% confidence interval). Make clear which confounders were adjusted for and why they were included | 13-14 |
|                          |     | (b) Report category boundaries when continuous variables were categorized                                                                                                                                    | 13-14 |
|                          |     | (c) If relevant, consider translating estimates of relative risk into absolute risk for a meaningful time period                                                                                             | -     |
| Other analyses           | 17  | Report other analyses done—eg analyses of subgroups and interactions, and sensitivity analyses                                                                                                               | -     |
| <b>Discussion</b>        |     |                                                                                                                                                                                                              |       |
| Key results              | 18  | Summarise key results with reference to study objectives                                                                                                                                                     | 15    |
| Limitations              | 19  | Discuss limitations of the study, taking into account sources of potential bias or imprecision. Discuss both direction and magnitude of any potential bias                                                   | 18-19 |
| Interpretation           | 20  | Give a cautious overall interpretation of results considering objectives, limitations, multiplicity of analyses, results from similar studies, and other relevant evidence                                   | 15-19 |
| Generalisability         | 21  | Discuss the generalisability (external validity) of the study results                                                                                                                                        | 19    |
| <b>Other information</b> |     |                                                                                                                                                                                                              |       |
| Funding                  | 22  | Give the source of funding and the role of the funders for the present study and, if applicable, for the original study on which the present article is based                                                | 19-20 |

\*Give information separately for cases and controls in case-control studies and, if applicable, for exposed and unexposed groups in cohort and cross-sectional studies.

**Note:** An Explanation and Elaboration article discusses each checklist item and gives methodological background and published examples of transparent reporting. The STROBE checklist is best used in conjunction with this article (freely available on the Web sites of PLoS Medicine at <http://www.plosmedicine.org/>, Annals of Internal Medicine at <http://www.annals.org/>, and Epidemiology at <http://www.epidem.com/>). Information on the STROBE Initiative is available at [www.strobe-statement.org](http://www.strobe-statement.org).
